# Supplementary material for: Convergent Evolutionary Trade-Offs between Olfaction and Vocal Learning in Mammals
Source: Research Square preprint supplement (doi:10.21203/rs.3.rs-8748829/v1), 2026-02-06
Supplement: Supplementary file 1 [file e0204ca38139d5fb1833d53c.xlsx]

## Sheet: Supplementary-Table-1
Species	Common name	Taxid	Family	Suborder	Order	Superorder	Subclass	Genome Accession	Assembly Level	Release Date	Assembly Name	Submitter
Acinonyx jubatus	Cheetah	32536	Felidae	Feliformia	Carnivora	Laurasiatheria	Eutheria	GCF 027475565.1	Chromosome	2022-12-28	VMU Ajub asm v1.0	University of Veterinary Medicine
Acomys cahirinus	Egyptian spiny mouse	10068	Muridae	Myomorpha	Rodentia	Euarchontoglires	Eutheria	GCA 004027535.1	Scaffold	2019-01-16	AcoCah v1 BIUU	Broad Institute
Acomys dimidiatus	Eastern spiny mouse	60744	Muridae	Myomorpha	Rodentia	Euarchontoglires	Eutheria	GCA 907164435.1	Chromosome	2021-07-06	mAcoDim1 REL 1905	WELLCOME TRUST SANGER INSTITUTE
Acomys kempi	Kemp's spiny mouse	83762	Muridae	Myomorpha	Rodentia	Euarchontoglires	Eutheria	GCA 907164505.1	Chromosome	2021-07-06	mAcoKem2 REL 1905	WELLCOME TRUST SANGER INSTITUTE
Acomys percivali	Percival's spiny mouse	83527	Muridae	Myomorpha	Rodentia	Euarchontoglires	Eutheria	GCA 907169655.1	Chromosome	2021-07-06	mAcoPer2 REL 1905	WELLCOME TRUST SANGER INSTITUTE
Acomys russatus	Golden spiny mouse	60746	Muridae	Myomorpha	Rodentia	Euarchontoglires	Eutheria	GCF 903995435.1	Chromosome	2020-08-21	mAcoRus1.1	SC
Addax nasomaculatus	Addax	59515	Bovidae	Ruminantia	Artiodactyla	Laurasiatheria	Eutheria	GCA 019593525.1	Scaffold	2021-08-13	ASM1959352v1	University of Potsdam
Aeorestes cinereus	Hoary bat	257879	Vespertilionidae	Microchiroptera	Chiroptera	Laurasiatheria	Eutheria	GCA 011751065.1	Scaffold	2020-03-25	L.cinereus Cryan 1219 p1.0	United States Geological Survey
Aepyceros melampus	Impala	9897	Bovidae	Ruminantia	Artiodactyla	Laurasiatheria	Eutheria	GCA 006408695.1	Scaffold	2019-06-24	IMP	Northwestern Polytechnical University
Ailuropoda melanoleuca	Giant panda	9646	Ursidae	Caniformia	Carnivora	Laurasiatheria	Eutheria	GCF 002007445.2	Chromosome	2020-04-20	ASM200744v3	Institute of Zoology, Chinese Academy of Sciences
Ailurus styani	Red panda	424585	Ailuridae	Caniformia	Carnivora	Laurasiatheria	Eutheria	GCA 002007465.1	Scaffold	2017-02-28	ASM200746v1	Institute of Zoology, Chinese Academy of Sciences
Alcelaphus buselaphus	Hartebeest	59517	Bovidae	Ruminantia	Artiodactyla	Laurasiatheria	Eutheria	GCA 006408545.1	Scaffold	2019-06-24	HBT	Northwestern Polytechnical University
Alces alces	Eurasian elk	9852	Cervidae	Ruminantia	Artiodactyla	Laurasiatheria	Eutheria	GCA 007570765.1	Scaffold	2019-07-12	GSC moose 1.0	Canada's Genomic Enterprise
Alexandromys oeconomus	Root vole	2162900	Cricetidae	Myomorpha	Rodentia	Euarchontoglires	Eutheria	GCA 007455595.1	Scaffold	2019-07-25	ASM745559v1	Groningen Institute for Evolutionary Life Sciences
Alouatta palliata	Mantled howler monkey	30589	Atelidae	Haplorrhini	Primates	Euarchontoglires	Eutheria	GCA 004027835.1	Scaffold	2019-01-16	AloPal v1 BIUU	Broad Institute
Ammotragus lervia	Aoudad	9899	Bovidae	Ruminantia	Artiodactyla	Laurasiatheria	Eutheria	GCA 002201775.1	Scaffold	2017-06-20	ALER1.0	Northwest A&F University
Anoura caudifer	Tailed tailless bat	27642	Phyllostomidae	Microchiroptera	Chiroptera	Laurasiatheria	Eutheria	GCA 004027475.1	Scaffold	2019-01-16	AnoCau v1 BIUU	Broad Institute
Antechinus flavipes	Yellow-footed antechinus	38775	Dasyuridae	na	Dasyuromorphia	na	Metatheria	GCF 016432865.1	Chromosome	2021-01-06	AdamAnt v2	Nanjing Normal University
Antechinus stuartii	Brown antechinus	9283	Dasyuridae	na	Dasyuromorphia	na	Metatheria	GCA 016696395.1	Scaffold	2021-01-15	USYD AStu M	University of Sydney
Antidorcas marsupialis	Springbok	59523	Bovidae	Ruminantia	Artiodactyla	Laurasiatheria	Eutheria	GCA 006408585.1	Scaffold	2019-06-24	SGB	Northwestern Polytechnical University
Antilocapra americana	Pronghorn	9891	Antilocapridae	Ruminantia	Artiodactyla	Laurasiatheria	Eutheria	GCA 007570785.1	Scaffold	2019-07-12	GSC phorn 1.0	Canada's Genomic Enterprise
Antrozous pallidus	Pallid bat	9440	Vespertilionidae	Microchiroptera	Chiroptera	Laurasiatheria	Eutheria	GCA 027563665.1	Chromosome	2023-01-09	DD ASM mAP 20210503	Bat1K
Aotus nancymaae	Ma's night monkey	37293	Aotidae	Haplorrhini	Primates	Euarchontoglires	Eutheria	GCF 000952055.2	Scaffold	2017-06-09	Anan 2.0	Baylor College of Medicine
Aplodontia rufa	Mountain beaver	51342	Aplodontiidae	Sciuromorpha	Rodentia	Euarchontoglires	Eutheria	GCA 004027875.1	Scaffold	2019-01-16	AplRuf v1 BIUU	Broad Institute
Apodemus speciosus	Large Japanese field mouse	105296	Muridae	Myomorpha	Rodentia	Euarchontoglires	Eutheria	GCA 002335545.1	Scaffold	2017-09-12	Aspe assembly01	University of the Ryukyus
Apodemus sylvaticus	European woodmouse	10129	Muridae	Myomorpha	Rodentia	Euarchontoglires	Eutheria	GCF 947179515.1	Chromosome	2022-10-28	mApoSyl1.1	WELLCOME SANGER INSTITUTE
Arctocephalus gazella	Antarctic fur seal	37190	Otariidae	Caniformia	Carnivora	Laurasiatheria	Eutheria	GCA 900642305.1	Scaffold	2019-02-08	arcGaz3	LMU
Arctocephalus townsendi	Guadalupe fur seal	161921	Otariidae	Caniformia	Carnivora	Laurasiatheria	Eutheria	GCA 028646355.1	Chromosome	2023-02-16	Arctocephalus townsendi HiC	DNA Zoo
Artibeus jamaicensis	Jamaican fruit-eating bat	9417	Phyllostomidae	Microchiroptera	Chiroptera	Laurasiatheria	Eutheria	GCF 021234435.1	Scaffold	2021-12-20	CSHL Jam final	CSHL
Arvicanthis niloticus	Nile rat	61156	Muridae	Myomorpha	Rodentia	Euarchontoglires	Eutheria	GCF 011762505.1	Chromosome	2020-03-27	mArvNil1.pat.X	Vertebrate Genomes Project
Arvicola amphibius	Eurasian water vole	1047088	Cricetidae	Myomorpha	Rodentia	Euarchontoglires	Eutheria	GCF 903992535.2	Chromosome	2021-05-15	mArvAmp1.2	Wellcome Sanger Institute
Ateles geoffroyi	Black-handed spider monkey	9509	Atelidae	Haplorrhini	Primates	Euarchontoglires	Eutheria	GCA 023783555.1	Contig	2022-06-17	ASM2378355v1	BGI-Shenzhen
Ateles hybridus	Brown spider monkey	129801	Atelidae	Haplorrhini	Primates	Euarchontoglires	Eutheria	GCA 916098195.1	Scaffold	2021-09-22	ORGONE 01	IBE (Institut de Biologia Evolutiva))
Axis porcinus	Hog deer	57737	Cervidae	Ruminantia	Artiodactyla	Laurasiatheria	Eutheria	GCA 003798545.1	Scaffold	2018-11-20	ASM379854v1	Novogene Bioinformatics Technology Corporation
Balaenoptera acutorostrata scammoni	Minke whale	310752	Balaenopteridae	Whippomorpha	Artiodactyla (Cetacea)	Laurasiatheria	Eutheria	GCF 000493695.1	Scaffold	2013-10-31	BalAcu1.0	Korea Ocean Research & Development Institute
Balaenoptera bonaerensis	Antarctic minke whale	33556	Balaenopteridae	Whippomorpha	Artiodactyla (Cetacea)	Laurasiatheria	Eutheria	GCA 000978805.1	Scaffold	2015-03-18	ASM97880v1	Division of Biological Science, Graduate School of Science, Kyoto University
Balaenoptera musculus	Blue whale	9771	Balaenopteridae	Whippomorpha	Artiodactyla (Cetacea)	Laurasiatheria	Eutheria	GCF 009873245.2	Chromosome	2020-10-02	mBalMus1.pri.v3	G10K
Balaenoptera physalus	Fin whale	9770	Balaenopteridae	Whippomorpha	Artiodactyla (Cetacea)	Laurasiatheria	Eutheria	GCA 023338255.1	Scaffold	2022-05-11	SBiKF Bphy ph2	Senckenberg BiK-F
Balaenoptera ricei	Rice's whale	2746895	Balaenopteridae	Whippomorpha	Artiodactyla (Cetacea)	Laurasiatheria	Eutheria	GCA 028023285.1	Chromosome	2023-01-30	mBalRic1.hap2	Vertebrate Genomes Project
Beatragus hunteri	Hirola	59527	Bovidae	Ruminantia	Artiodactyla	Laurasiatheria	Eutheria	GCA 004027495.1	Scaffold	2019-01-16	BeaHun v1 BIUU	Broad Institute
Bison bison bison	Plains bison	43346	Bovidae	Ruminantia	Artiodactyla	Laurasiatheria	Eutheria	GCF 000754665.1	Scaffold	2014-10-08	Bison UMD1.0	University of Maryland
Bos frontalis	Gayal	30520	Bovidae	Ruminantia	Artiodactyla	Laurasiatheria	Eutheria	GCA 007844835.1	Scaffold	2019-08-05	NRC Mithun 1	NRC on Mithun ICAR
Bos gaurus	Gaur	9904	Bovidae	Ruminantia	Artiodactyla	Laurasiatheria	Eutheria	GCA 014182915.2	Chromosome	2020-08-14	ARS UOA Gaur 1.1	USDA, ARS, USMARC
Bos gaurus x Bos taurus	Hybrid cow	1705790	Bovidae	Ruminantia	Artiodactyla	Laurasiatheria	Eutheria	GCA 946052875.1	Chromosome	2022-09-11	ARS Pied mat1.0	ETH ZURICH
Bos grunniens	Domestic yak	30521	Bovidae	Ruminantia	Artiodactyla	Laurasiatheria	Eutheria	GCA 005887515.3	Chromosome	2019-06-10	BosGru3.1	Lanzhou University
Bos grunniens x Bos taurus	Dzo	331036	Bovidae	Ruminantia	Artiodactyla	Laurasiatheria	Eutheria	GCA 009493645.1	Chromosome	2019-11-04	ARS UNL BGru maternal 1.0 p	University of Nebraska - Lincoln
Bos indicus	Zebu cattle	9915	Bovidae	Ruminantia	Artiodactyla	Laurasiatheria	Eutheria	GCF 000247795.1	Chromosome	2014-11-25	Bos indicus 1.0	Genoa Biotecnologia SA
Bos indicus x Bos taurus	Hybrid cattle	30522	Bovidae	Ruminantia	Artiodactyla	Laurasiatheria	Eutheria	GCF 003369695.1	Chromosome	2018-11-30	UOA Brahman 1	University of Adelaide
Bos mutus	Wild yak	72004	Bovidae	Ruminantia	Artiodactyla	Laurasiatheria	Eutheria	GCF 000298355.1	Scaffold	2013-01-09	BosGru v2.0	BGI-shenzhen
Bos taurus	Domestic cattle	9913	Bovidae	Ruminantia	Artiodactyla	Laurasiatheria	Eutheria	GCF 002263795.2	Chromosome	2018-04-11	ARS-UCD1.3	USDA ARS
Bos taurus x Bison bison	Beefalo	297284	Bovidae	Ruminantia	Artiodactyla	Laurasiatheria	Eutheria	GCA 018282465.1	Chromosome	2021-05-06	ARS Simm1.0	USDA ARS
Bradypus variegatus	Brown-throated sloth	9355	Bradypodidae	Folivora	Pilosa	Xenarthra	Eutheria	GCA 004027775.1	Scaffold	2019-01-16	BraVar v1 BIUU	Broad Institute
Bubalus bubalis	Water buffalo	89462	Bovidae	Ruminantia	Artiodactyla	Laurasiatheria	Eutheria	GCF 019923935.1	Chromosome	2021-09-10	NDDB SH 1	National Dairy Development Board, India
Bubalus depressicornis	Lowland anoa	27596	Bovidae	Ruminantia	Artiodactyla	Laurasiatheria	Eutheria	GCA 025584935.1	Scaffold	2022-10-05	MNHNYannick LA 1	Museum national d'Histoire naturelle
Budorcas taxicolor	Takin	37181	Bovidae	Ruminantia	Artiodactyla	Laurasiatheria	Eutheria	GCF 023091745.1	Chromosome	2022-04-22	Takin1.1	Northwest A&F University
Callithrix jacchus	White-tufted-ear marmoset	9483	Cebidae	Haplorrhini	Primates	Euarchontoglires	Eutheria	GCF 011100555.1	Chromosome	2021-04-28	mCalJa1.2.pat.X	Vertebrate Genomes Project
Callorhinus ursinus	Northern fur seal	34884	Otariidae	Caniformia	Carnivora	Laurasiatheria	Eutheria	GCF 003265705.1	Scaffold	2018-06-26	ASM326570v1	Canada's Genomics Enterprise
Camelus bactrianus	Bactrian camel	9837	Camelidae	Tylopoda	Artiodactyla	Laurasiatheria	Eutheria	GCF 000767855.1	Scaffold	2014-10-23	Ca bactrianus MBC 1.0	Inner Mongolia Agricultural University, P.R.China
Camelus dromedarius	Arabian camel	9838	Camelidae	Tylopoda	Artiodactyla	Laurasiatheria	Eutheria	GCF 000803125.2	Chromosome	2019-10-07	CamDro3	Vetmeduni Vienna
Camelus ferus	Wild Bactrian camel	419612	Camelidae	Tylopoda	Artiodactyla	Laurasiatheria	Eutheria	GCF 009834535.1	Chromosome	2020-01-08	BCGSAC Cfer 1.0	The Bactrian Camels Genome Sequencing and Analysis Consortium
Canis lupus dingo	Dingo	286419	Canidae	Caniformia	Carnivora	Laurasiatheria	Eutheria	GCF 003254725.2	Chromosome	2020-09-11	ASM325472v2	James Cook University
Canis lupus familiaris	Dog	9615	Canidae	Caniformia	Carnivora	Laurasiatheria	Eutheria	GCF 000002285.5	Chromosome	2020-10-06	Dog10K Boxer Tasha	Dog Genome Sequencing Consortium
Caperea marginata	Pygmy right whale	27604	Neobalaenidae	Whippomorpha	Artiodactyla (Cetacea)	Laurasiatheria	Eutheria	GCA 029224305.1	Scaffold	2023-03-16	Cmar C18 SBIK-F TBG 1	Senckenberg BiK-F, LOEWE-TBG
Capra aegagrus	Wild goat	9923	Bovidae	Ruminantia	Artiodactyla	Laurasiatheria	Eutheria	GCA 000978405.1	Chromosome	2015-04-24	CapAeg 1.0	BGI
Capra hircus	Goat	9925	Bovidae	Ruminantia	Artiodactyla	Laurasiatheria	Eutheria	GCF 001704415.2	Chromosome	2016-08-24	ARS1.2	USDA ARS
Capra ibex	Alpine ibex	72542	Bovidae	Ruminantia	Artiodactyla	Laurasiatheria	Eutheria	GCA 006410555.1	Scaffold	2019-06-24	IBX	Northwestern Polytechnical University
Capra sibirica	Siberian ibex	72544	Bovidae	Ruminantia	Artiodactyla	Laurasiatheria	Eutheria	GCA 003182615.2	Scaffold	2018-10-30	ASM318261v2	Northwest A&F University
Capreolus capreolus	Western roe deer	9858	Cervidae	Ruminantia	Artiodactyla	Laurasiatheria	Eutheria	GCA 000751575.1	Scaffold	2014-09-09	kmer631	UNIMELB
Capreolus pygargus	Eastern roe deer	48560	Cervidae	Ruminantia	Artiodactyla	Laurasiatheria	Eutheria	GCA 012922965.1	Scaffold	2020-04-28	ASM1292296v1	Northwestern Polytechnical University
Capromys pilorides	Desmarest's hutia	34842	Capromyidae	Hystricomorpha	Rodentia	Euarchontoglires	Eutheria	GCA 004027915.1	Scaffold	2019-01-16	CapPil v1 BIUU	Broad Institute
Caracal caracal	Caracal	61394	Felidae	Feliformia	Carnivora	Laurasiatheria	Eutheria	GCA 016801355.1	Scaffold	2021-02-02	CarCar1.0	Felidae consortium
Carlito syrichta	Philippine tarsier	1868482	Tarsiidae	Haplorrhini	Primates	Euarchontoglires	Eutheria	GCF 000164805.1	Scaffold	2013-09-18	Tarsius syrichta-2.0.1	Washington University (WashU)
Carollia perspicillata	Seba's short-tailed bat	40233	Phyllostomidae	Microchiroptera	Chiroptera	Laurasiatheria	Eutheria	GCA 004027735.1	Scaffold	2019-01-16	CarPer v1 BIUU	Broad Institute
Castor canadensis	American beaver	51338	Castoridae	Castorimorpha	Rodentia	Euarchontoglires	Eutheria	GCF 001984765.1	Scaffold	2017-02-04	C.can genome v1.0	Hospital for Sick Children
Catagonus wagneri	Chacoan peccary	51154	Tayassuidae	Suina	Artiodactyla	Laurasiatheria	Eutheria	GCA 004024745.2	Scaffold	2019-07-15	CatWag v2 BIUU UCD	Broad Institute
Cavia aperea	Brazilian guinea pig	37548	Caviidae	Hystricomorpha	Rodentia	Euarchontoglires	Eutheria	GCA 000688575.1	Scaffold	2014-01-21	CavAp1.0	Leibniz Institute for Zoo and Wildlife research
Cavia porcellus	Domestic guinea pig	10141	Caviidae	Hystricomorpha	Rodentia	Euarchontoglires	Eutheria	GCF 000151735.1	Scaffold	2008-03-03	Cavpor3.0	The Genome Sequencing Platform, The Genome Assembly Team
Cavia tschudii	Montane guinea pig	143287	Caviidae	Hystricomorpha	Rodentia	Euarchontoglires	Eutheria	GCA 004027695.1	Scaffold	2019-01-16	CavTsc v1 BIUU	Broad Institute
Cebus albifrons	White-fronted capuchin	9514	Cebidae	Haplorrhini	Primates	Euarchontoglires	Eutheria	GCA 023783575.1	Contig	2022-06-17	ASM2378357v1	BGI-Shenzhen
Cebus imitator	Panamanian white-faced capuchin	2715852	Cebidae	Haplorrhini	Primates	Euarchontoglires	Eutheria	GCF 001604975.1	Scaffold	2016-04-04	Cebus imitator-1.0	McDonnell Genome Institute - Washington University School of Medicine
Cephalopachus bancanus	Horsfield's tarsier	9477	Tarsiidae	Haplorrhini	Primates	Euarchontoglires	Eutheria	GCA 027257055.1	Contig	2022-12-23	ASM2725705v1	BGI
Cephalophus harveyi	Harvey's duiker	129224	Bovidae	Ruminantia	Artiodactyla	Laurasiatheria	Eutheria	GCA 006410635.1	Scaffold	2019-06-24	HVD	Northwestern Polytechnical University
Ceratotherium simum simum	Southern white rhinoceros	73337	Rhinocerotidae	na	Perissodactyla	Laurasiatheria	Eutheria	GCF 000283155.1	Scaffold	2012-07-31	CerSimSim1.0	Broad Institute
Cercocebus atys	Sooty mangabey	9531	Cercopithecidae	Haplorrhini	Primates	Euarchontoglires	Eutheria	GCF 000955945.1	Scaffold	2015-03-19	Caty 1.0	Human Genome Sequencing Center - BCM
Cercopithecus albogularis	Sykes' monkey	867370	Cercopithecidae	Haplorrhini	Primates	Euarchontoglires	Eutheria	GCA 023783535.1	Contig	2022-06-17	ASM2378353v1	BGI-Shenzhen
Cercopithecus mitis	Blue monkey	36225	Cercopithecidae	Haplorrhini	Primates	Euarchontoglires	Eutheria	GCA 028627265.1	Chromosome	2023-02-16	Cercopithecus mitis HiC	DNA Zoo
Cercopithecus mona	Mona monkey	36226	Cercopithecidae	Haplorrhini	Primates	Euarchontoglires	Eutheria	GCA 014849445.1	Scaffold	2020-10-05	KIZ CMon 1.0	Kunming Institute of Zoology, Chinese Academy of Sciences
Cercopithecus neglectus	De Brazza's monkey	36227	Cercopithecidae	Haplorrhini	Primates	Euarchontoglires	Eutheria	GCA 004027615.1	Scaffold	2019-01-16	CertNeg v1 BIUU	Broad Institute
Cervus albirostris	White-lipped deer	1088058	Cervidae	Ruminantia	Artiodactyla	Laurasiatheria	Eutheria	GCA 006408465.1	Scaffold	2019-06-24	WLD	Northwestern Polytechnical University
Cervus canadensis	Elk	1574408	Cervidae	Ruminantia	Artiodactyla	Laurasiatheria	Eutheria	GCF 019320065.1	Chromosome	2021-07-26	ASM1932006v1	Iowa State University
Cervus elaphus	Red deer	9860	Bovidae	Ruminantia	Artiodactyla	Laurasiatheria	Eutheria	GCF 910594005.1	Chromosome	2021-07-07	mCerEla1.1	WELLCOME SANGER INSTITUTE
Cervus hanglu yarkandensis	Yarkand deer	84702	Cervidae	Ruminantia	Artiodactyla	Laurasiatheria	Eutheria	GCA 010411085.1	Chromosome	2020-02-12	CEY v1	Institute of Special Wild Economic Animals and Plants, Chinese Academy of Agricultural Sciences
Chaetophractus vellerosus	Screaming hairy armadillo	340076	Chlamyphoridae	na	Cingulata	Xenarthra	Eutheria	GCA 004027955.1	Scaffold	2019-01-16	ChaVel v1 BIUU	Broad Institute
Cheirogaleus medius	Lesser dwarf lemur	9460	Cheirogaleidae	Strepsirrhini	Primates	Euarchontoglires	Eutheria	GCA 008086735.1	Scaffold	2019-08-26	ASM808673v1	Duke University
Chinchilla lanigera	Long-tailed chinchilla	34839	Chinchillidae	Hystricomorpha	Rodentia	Euarchontoglires	Eutheria	GCF 000276665.1	Scaffold	2012-08-28	ChiLan1.0	Broad Institute
Chlorocebus aethiops	Grivet	9534	Cercopithecidae	Haplorrhini	Primates	Euarchontoglires	Eutheria	GCA 023783515.1	Contig	2022-06-17	ASM2378351v1	BGI-Shenzhen
Chlorocebus sabaeus	Green monkey	60711	Cercopithecidae	Haplorrhini	Primates	Euarchontoglires	Eutheria	GCF 015252025.1	Scaffold	2020-11-06	Vero WHO p1.0	Viral Vectors and Vaccines Bioprocessing Group, McGill University
Choloepus didactylus	Southern two-toed sloth	27675	Megalonychidae	Folivora	Pilosa	Xenarthra	Eutheria	GCF 015220235.1	Chromosome	2020-11-03	mChoDid1.pri	Vertebrate Genomes Project
Choloepus hoffmanni	Hoffmann's two-fingered sloth	9358	Megalonychidae	Folivora	Pilosa	Xenarthra	Eutheria	GCA 000164785.2	Scaffold	2014-09-30	C hoffmanni-2.0.1	The Genome Institute, Washington University School of Medicine
Chrysochloris asiatica	Cape golden mole	185453	Chrysochloridae	na	na	Afrotheria	Eutheria	GCF 000296735.1	Scaffold	2012-09-19	ChrAsi1.0	Broad Institute
Chrysocyon brachyurus	Maned wolf	68728	Canidae	Caniformia	Carnivora	Laurasiatheria	Eutheria	GCA 028533335.1	Chromosome	2023-02-09	Chrysocyon brachyurus HiC	DNA Zoo
Coendou prehensilis	Brazilian porcupine	187985	Erethizontidae	Hystricomorpha	Rodentia	Euarchontoglires	Eutheria	GCA 028534165.1	Chromosome	2023-02-09	Coendou prehensilis HiC	DNA Zoo
Colobus angolensis palliatus	Angola colobus	336983	Cercopithecidae	Haplorrhini	Primates	Euarchontoglires	Eutheria	GCF 000951035.1	Scaffold	2015-03-12	Cang.pa 1.0	Baylor College of Medicine
Colobus guereza	Mantled guereza	33548	Cercopithecidae	Haplorrhini	Primates	Euarchontoglires	Eutheria	GCA 021498455.1	Chromosome	2022-01-19	ASM2149845v1	BGI-Shenzhen
Condylura cristata	Star-nosed mole	143302	Talpidae	na	Eulipotyphla	Laurasiatheria	Eutheria	GCF 000260355.1	Scaffold	2012-05-01	ConCri1.0	Broad Institute
Connochaetes taurinus	Brindled gnu	9927	Bovidae	Ruminantia	Artiodactyla	Laurasiatheria	Eutheria	GCA 006408615.1	Scaffold	2019-06-24	BWD	Northwestern Polytechnical University
Craseonycteris thonglongyai	Hog-nosed bat	208972	Craseonycteridae	Microchiroptera	Chiroptera	Laurasiatheria	Eutheria	GCA 004027555.1	Scaffold	2019-01-16	CraTho v1 BIUU	Broad Institute
Cricetomys gambianus	Gambian giant pouched rat	10085	Nesomyidae	Myomorpha	Rodentia	Euarchontoglires	Eutheria	GCA 004027575.1	Scaffold	2019-01-16	CriGam v1 BIUU	Broad Institute
Cricetulus griseus	Chinese hamster	10029	Cricetidae	Myomorpha	Rodentia	Euarchontoglires	Eutheria	GCF 000223135.1	Scaffold	2011-08-23	CriGri 1.0	Beijing Genomics Institute
Crocidura indochinensis	Indochinese shrew	876679	Soricidae	na	Eulipotyphla	Laurasiatheria	Eutheria	GCA 004027635.1	Scaffold	2019-01-16	CroInd v1 BIUU	Broad Institute
Crocuta crocuta	Spotted hyena	9678	Hyaenidae	Feliformia	Carnivora	Laurasiatheria	Eutheria	GCA 008692635.1	Scaffold	2019-10-07	BGI CrCroc 1.0	BGI
Cryptoprocta ferox	Fossa	94188	Eupleridae	Feliformia	Carnivora	Laurasiatheria	Eutheria	GCA 028646485.1	Chromosome	2023-02-16	Cryptoprocta ferox HiC	DNA Zoo
Cryptotis parvus	Least shrew	183661	Soricidae	na	Eulipotyphla	Laurasiatheria	Eutheria	GCA 021461705.1	Contig	2022-01-13	Cryptotis parva assembly 1.0	National Institutes of Health
Ctenodactylus gundi	Northern gundi	10166	Ctenodactylidae	Hystricomorpha	Rodentia	Euarchontoglires	Eutheria	GCA 004027205.1	Scaffold	2019-01-16	CteGun v1 BIUU	Broad Institute
Ctenomys sociabilis	Social tuco-tuco	43321	Ctenomyidae	Hystricomorpha	Rodentia	Euarchontoglires	Eutheria	GCA 004027165.1	Scaffold	2019-01-16	CteSoc v1 BIUU	Broad Institute
Cuniculus paca	Lowland paca	108852	Cuniculidae	Hystricomorpha	Rodentia	Euarchontoglires	Eutheria	GCA 004365215.1	Scaffold	2019-03-22	CunPac v1 BIUU	Broad Institute
Cynocephalus volans	Philippine flying lemur	110931	Cynocephalidae	na	Dermoptera	Euarchontoglires	Eutheria	GCA 027409185.1	Chromosome	2022-12-28	mCynVol1.pri	Vertebrate Genomes Project
Cynomys gunnisoni	Gunnison's prairie dog	45479	Sciuridae	Sciuromorpha	Rodentia	Euarchontoglires	Eutheria	GCA 011316645.1	Scaffold	2020-03-16	ASM1131664v1	Smithsonian Herndon Data Center
Cynopterus brachyotis	Lesser short-nosed fruit bat	58060	Pteropodidae	Megachiroptera	Chiroptera	Laurasiatheria	Eutheria	GCA 009793145.1	Scaffold	2019-12-23	ASM979314v1	National University of Singapore
Damaliscus lunatus	Topi	9929	Bovidae	Ruminantia	Artiodactyla	Laurasiatheria	Eutheria	GCA 006408505.1	Scaffold	2019-06-24	CTB	Northwestern Polytechnical University
Dasyprocta punctata	Punctate agouti	34846	Dasyproctidae	Hystricomorpha	Rodentia	Euarchontoglires	Eutheria	GCA 004363535.1	Scaffold	2019-03-22	DasPun v1 BIUU	Broad Institute
Dasypus novemcinctus	Nine-banded armadillo	9361	Dasypodidae	na	Cingulata	Xenarthra	Eutheria	GCF 000208655.3	Scaffold	2012-01-06	Dasnov3.2	Baylor College of Medicine
Dasyurus viverrinus	Eastern quoll	9279	Dasyuridae	na	Dasyuromorphia	na	Metatheria	GCA 020854095.1	Chromosome	2021-11-12	UniMelb DasViv v1.0	The University of Melbourne
Daubentonia madagascariensis	Aye-aye	31869	Daubentoniidae	Strepsirrhini	Primates	Euarchontoglires	Eutheria	GCA 023783475.1	Contig	2022-06-17	ASM2378347v1	BGI-Shenzhen
Delphinapterus leucas	Beluga whale	9749	Monodontidae	Whippomorpha	Artiodactyla (Cetacea)	Laurasiatheria	Eutheria	GCF 002288925.2	Scaffold	2019-08-29	ASM228892v3	BC Cancer Agency
Desmodus rotundus	Common vampire bat	9430	Phyllostomidae	Microchiroptera	Chiroptera	Laurasiatheria	Eutheria	GCF 022682495.1	Chromosome	2022-03-24	HLdesRot8A	Bat1K
Dicerorhinus sumatrensis harrissoni	Bornean rhinoceros	310711	Rhinocerotidae	na	Perissodactyla	Laurasiatheria	Eutheria	GCA 014189135.1	Scaffold	2020-08-14	NRM Dsumatrensis v1.fasta	Swedish Museum of Natural History
Dicrostonyx torquatus	Arctic lemming	85952	Cricetidae	Myomorpha	Rodentia	Euarchontoglires	Eutheria	GCA 028555095.1	Scaffold	2023-02-08	ASM2855509v1	University of Alaska Fairbanks
Dinomys branickii	Pacarana	108858	Dinomyidae	Hystricomorpha	Rodentia	Euarchontoglires	Eutheria	GCA 004027595.1	Scaffold	2019-01-16	DinBra v1 BIUU	Broad Institute
Dipodomys merriami	Merriam's kangaroo rat	94247	Heteromyidae	Castorimorpha	Rodentia	Euarchontoglires	Eutheria	GCA 024711535.1	Scaffold	2022-08-18	mDipMer1.0.p	UCLA
Dipodomys ordii	Ord's kangaroo rat	10020	Heteromyidae	Castorimorpha	Rodentia	Euarchontoglires	Eutheria	GCF 000151885.1	Scaffold	2014-12-12	Dord 2.0	Baylor College of Medicine
Dipodomys spectabilis	Banner-tailed kangaroo rat	105255	Heteromyidae	Castorimorpha	Rodentia	Euarchontoglires	Eutheria	GCF 019054845.1	Contig	2021-06-29	ASM1905484v1	Auburn University
Dipodomys stephensi	Stephens's kangaroo rat	323379	Heteromyidae	Castorimorpha	Rodentia	Euarchontoglires	Eutheria	GCA 004024685.1	Scaffold	2019-01-15	DipSte v1 BIUU	Broad Institute
Dolichotis patagonum	Patagonian cavy	29091	Caviidae	Hystricomorpha	Rodentia	Euarchontoglires	Eutheria	GCA 004027295.1	Scaffold	2019-01-16	DolPat v1 BIUU	Broad Institute
Dromiciops gliroides	Monito del monte	33562	Microbiotheriidae	na	Microbiotheria	na	Metatheria	GCF 019393635.1	Chromosome	2021-08-03	mDroGli1.pri	Vertebrate Genomes Project
Dugong dugon	Dugong	29137	Dugongidae	na	Sirenia	Afrotheria	Eutheria	GCA 905400935.1	Scaffold	2022-02-18	Dugong	Max-Planck Institute for Evolutionary Anthropology
Echinops telfairi	Small Madagascar hedgehog	9371	Tenrecidae	na	na	Afrotheria	Eutheria	GCF 000313985.2	Scaffold	2019-07-15	ASM31398v2	Broad Institute
Eidolon dupreanum	Malagasy straw-colored fruit bat	58063	Pteropodidae	Megachiroptera	Chiroptera	Laurasiatheria	Eutheria	GCA 028627145.1	Chromosome	2023-02-16	Eidolon dupreanum HiC	DNA Zoo
Eidolon helvum	Straw-colored fruit bat	77214	Pteropodidae	Megachiroptera	Chiroptera	Laurasiatheria	Eutheria	GCA 000465285.1	Scaffold	2013-09-13	ASM46528v1	School of Biological & Chemical Sciences, Queen Mary University of London
Eira barbara	Tayra	204263	Mustelidae	Caniformia	Carnivora	Laurasiatheria	Eutheria	GCA 020311275.1	Scaffold	2021-10-05	ASM2031127v1	Leibniz Institute for Zoo and Wildlife Research (IZW)
Elaphurus davidianus	Pere David's deer	43332	Cervidae	Ruminantia	Artiodactyla	Laurasiatheria	Eutheria	GCA 021018665.1	Scaffold	2021-12-01	miluL	Northwestern Polytechnical University
Elephantulus edwardii	Cape elephant shrew	28737	Macroscelididae	na	Macroscelidea	Afrotheria	Eutheria	GCF 000299155.1	Scaffold	2012-10-10	EleEdw1.0	Broad Institute
Elephas maximus indicus	Indian elephant	99487	Elephantidae	na	Proboscidea	Afrotheria	Eutheria	GCF 024166365.1	Chromosome	2022-07-06	mEleMax1 primary haplotype	Vertebrate Genomes Project
Ellobius lutescens	Transcaucasian mole vole	3370998	Cricetidae	Myomorpha	Rodentia	Euarchontoglires	Eutheria	GCA 001685075.1	Scaffold	2016-07-14	ASM168507v1	Erasmus medical center (ErasmusMC)
Ellobius talpinus	Northern mole vole	329620	Cricetidae	Myomorpha	Rodentia	Euarchontoglires	Eutheria	GCA 001685095.1	Scaffold	2016-07-14	ETalpinus 0.1	Erasmus medical center (ErasmusMC)
Enhydra lutris kenyoni	Northern sea otter	391180	Mustelidae	Caniformia	Carnivora	Laurasiatheria	Eutheria	GCF 002288905.1	Scaffold	2017-09-11	ASM228890v2	BC Cancer Agency
Eonycteris spelaea	Lesser dawn bat	58065	Pteropodidae	Megachiroptera	Chiroptera	Laurasiatheria	Eutheria	GCA 003508835.1	Contig	2018-09-07	Espe.v1	Duke-NUS Medical School
Eptesicus fuscus	Big brown bat	29078	Vespertilionidae	Microchiroptera	Chiroptera	Laurasiatheria	Eutheria	GCF 000308155.1	Scaffold	2012-11-08	EptFus1.0	Broad Institute
Equus asinus	Ass	9793	Equidae	na	Perissodactyla	Laurasiatheria	Eutheria	GCF 016077325.2	Chromosome	2021-10-14	ASM1607732v2	Dairy Cattle Research Center, Shandong Academy of Agricultural Sciences
Equus caballus	Horse	9796	Equidae	na	Perissodactyla	Laurasiatheria	Eutheria	GCF 002863925.1	Chromosome	2018-01-05	EquCab3.0	University of Louisville
Equus przewalskii	Przewalski's horse	9798	Equidae	na	Perissodactyla	Laurasiatheria	Eutheria	GCF 000696695.1	Scaffold	2014-06-05	Burgud	College of Animal Science, Inner Mongolian Agricultural University, China
Equus quagga	Zebra	89248	Equidae	na	Perissodactyla	Laurasiatheria	Eutheria	GCF 021613505.1	Chromosome	2022-01-31	UCLA HA Equagga 1.0	University of California Los Angeles
Erethizon dorsatum	North American porcupine	34844	Erethizontidae	Hystricomorpha	Rodentia	Euarchontoglires	Eutheria	GCA 028451465.1	Chromosome	2023-02-06	mEreDor1.pri	Vertebrate Genomes Project
Erinaceus europaeus	Western European hedgehog	9365	Erinaceidae	na	Eulipotyphla	Laurasiatheria	Eutheria	GCF 000296755.1	Scaffold	2012-09-19	EriEur2.0	Broad Institute
Erythrocebus patas	Red guenon	9538	Cercopithecidae	Haplorrhini	Primates	Euarchontoglires	Eutheria	GCA 023783455.1	Contig	2022-06-17	ASM2378345v1	BGI-Shenzhen
Eschrichtius robustus	Grey whale	9764	Eschrichtiidae	Whippomorpha	Artiodactyla (Cetacea)	Laurasiatheria	Eutheria	GCA 028021215.1	Chromosome	2023-01-31	mEscRob2.pri	Vertebrate Genomes Project
Eubalaena glacialis	North Atlantic right whale	27606	Balaenidae	Whippomorpha	Artiodactyla (Cetacea)	Laurasiatheria	Eutheria	GCA 028564815.1	Chromosome	2023-02-09	mEubGla1.hap2	Vertebrate Genomes Project
Eubalaena japonica	North Pacific right whale	302098	Balaenidae	Whippomorpha	Artiodactyla (Cetacea)	Laurasiatheria	Eutheria	GCA 004363455.1	Scaffold	2019-03-22	EubJap v1 BIUU	Broad Institute
Eudorcas thomsonii	Thomson's gazelle	69308	Bovidae	Ruminantia	Artiodactyla	Laurasiatheria	Eutheria	GCA 006408755.1	Scaffold	2019-06-24	TMG	Northwestern Polytechnical University
Eulemur flavifrons	Sclater's lemur	87288	Lemuridae	Strepsirrhini	Primates	Euarchontoglires	Eutheria	GCA 001262665.1	Scaffold	2015-08-06	Eflavifronsk33QCA	University of Chicago
Eulemur fulvus	Brown lemur	13515	Lemuridae	Strepsirrhini	Primates	Euarchontoglires	Eutheria	GCA 004027275.1	Scaffold	2019-01-16	EulFul v1 BIUU	Broad Institute
Eulemur macaco	Black lemur	30602	Lemuridae	Strepsirrhini	Primates	Euarchontoglires	Eutheria	GCA 001262655.1	Scaffold	2015-08-06	Emacaco refEf BWA oneround	University of Chicago
Eulemur mongoz	Mongoose lemur	34828	Lemuridae	Strepsirrhini	Primates	Euarchontoglires	Eutheria	GCA 028534055.1	Chromosome	2023-02-09	Eulemur mongoz HiC	DNA Zoo
Eumetopias jubatus	Steller sea lion	34886	Otariidae	Caniformia	Carnivora	Laurasiatheria	Eutheria	GCF 004028035.1	Scaffold	2019-01-15	ASM402803v1	Canada's Genomic Enterprise
Felis catus	Domestic cat	9685	Felidae	Feliformia	Carnivora	Laurasiatheria	Eutheria	GCF 018350175.1	Chromosome	2021-05-13	F.catus Fca126 mat1.0	Texas A&M University
Felis chaus	Jungle cat	61376	Felidae	Feliformia	Carnivora	Laurasiatheria	Eutheria	GCA 019924945.1	Chromosome	2021-09-14	FelChav1.0	Texas A&M University
Felis nigripes	Black-footed cat	61379	Felidae	Feliformia	Carnivora	Laurasiatheria	Eutheria	GCA 028533295.1	Chromosome	2023-02-09	Felis nigripes HiC	DNA Zoo
Fukomys damarensis	Damara mole-rat	885580	Bathyergidae	Hystricomorpha	Rodentia	Euarchontoglires	Eutheria	GCF 012274545.1	Scaffold	2020-04-13	DMR v1.0 HiC	DNA Zoo Consortium
Galago moholi	Moholi bushbaby	30609	Galagidae	Strepsirrhini	Primates	Euarchontoglires	Eutheria	GCA 023783435.1	Contig	2022-06-17	ASM2378343v1	BGI-Shenzhen
Galemys pyrenaicus	Pyrenean desman	202257	Talpidae	na	Eulipotyphla	Laurasiatheria	Eutheria	GCA 019455555.1	Scaffold	2021-08-05	Gpyr 1.0	Institute of Evolutionary Biology (CSIC-UPF)
Galeopterus variegatus	Sunda flying lemur	482537	Cynocephalidae	na	Dermoptera	Euarchontoglires	Eutheria	GCF 000696425.1	Scaffold	2014-06-05	G variegatus-3.0.2	Washington University (WashU)
Giraffa tippelskirchi	Masai giraffe	439328	Giraffidae	Ruminantia	Artiodactyla	Laurasiatheria	Eutheria	GCA 013496395.1	Chromosome	2020-07-24	ASM1349639v1	University of California Davis
Glaucomys volans	Southern flying squirrel	64683	Sciuridae	Sciuromorpha	Rodentia	Euarchontoglires	Eutheria	GCA 020662805.1	Scaffold	2021-10-28	ASM2066280v1	Wildlife Research and Monitoring Section
Glis glis	Fat dormouse	41261	Gliridae	Sciuromorpha	Rodentia	Euarchontoglires	Eutheria	GCA 004027185.1	Scaffold	2019-01-16	GliGli v1 BIUU	Broad Institute
Globicephala melas	Long-finned pilot whale	9731	Delphinidae	Whippomorpha	Artiodactyla (Cetacea)	Laurasiatheria	Eutheria	GCF 006547405.1	Scaffold	2019-07-01	ASM654740v1	Canada's Genomic Enterprise
Gorilla gorilla gorilla	Western lowland gorilla	9595	Hominidae	Haplorrhini	Primates	Euarchontoglires	Eutheria	GCF 008122165.1	Chromosome	2019-08-28	Kamilah GGO v0	University of Washington
Gracilinanus agilis	Agile gracile mouse opossum	191870	Didelphidae	na	Didelphimorphia	na	Metatheria	GCF 016433145.1	Chromosome	2021-01-06	AgileGrace	Nanjing Normal University
Grammomys dolichurus	Common thicket rat	491754	Muridae	Myomorpha	Rodentia	Euarchontoglires	Eutheria	GCA 019843835.1	Scaffold	2021-09-01	ASM1984383v1	University of Pennsylvania
Grammomys surdaster	African woodland thicket rats	491861	Muridae	Myomorpha	Rodentia	Euarchontoglires	Eutheria	GCF 004785775.1	Scaffold	2019-04-12	NIH TR 1.0	NIH Sequencing Center
Grampus griseus	Risso's dolphin	83653	Delphinidae	Whippomorpha	Artiodactyla (Cetacea)	Laurasiatheria	Eutheria	GCA 028646425.1	Chromosome	2023-02-16	Grampus griseus HiC	DNA Zoo
Graphiurus murinus	Woodland dormouse	51346	Gliridae	Sciuromorpha	Rodentia	Euarchontoglires	Eutheria	GCA 004027655.1	Scaffold	2019-01-16	GraMur v1 BIUU	Broad Institute
Gymnobelideus leadbeateri	Leadbeater's possum	38618	Petauridae	na	Diprotodontia	na	Metatheria	GCA 011680675.1	Scaffold	2020-03-23	LBP v1	Deakin University
Halichoerus grypus	Gray seal	9711	Phocidae	Caniformia	Carnivora	Laurasiatheria	Eutheria	GCF 012393455.1	Scaffold	2020-04-15	Tufts HGry 1.1	Cummings School of Veterinary Medicine at Tufts University
Helarctos malayanus	Malayan sun bear	9634	Ursidae	Caniformia	Carnivora	Laurasiatheria	Eutheria	GCA 028533245.1	Chromosome	2023-02-09	Helarctos malayanus HiC	DNA Zoo
Helogale parvula	Dwarf mongoose	210647	Herpestidae	Feliformia	Carnivora	Laurasiatheria	Eutheria	GCA 004023845.1	Scaffold	2019-01-15	HelPar v1 BIUU	Broad Institute
Hemitragus hylocrius	Nilgiri tahr	3349691	Bovidae	Ruminantia	Artiodactyla	Laurasiatheria	Eutheria	GCA 004026825.1	Scaffold	2019-01-16	HemHyl v1 BIUU	Broad Institute
Heterocephalus glaber	Naked mole-rat	10181	Bathyergidae	Hystricomorpha	Rodentia	Euarchontoglires	Eutheria	GCF 000247695.1	Scaffold	2012-02-17	HetGla female 1.0	Broad Institute
Heterohyrax brucei	Yellow-spotted hyrax	77598	Procaviidae	na	Hyracoidea	Afrotheria	Eutheria	GCA 028571685.1	Chromosome	2023-02-10	mHetBru1.pri	Vertebrate Genomes Project
Hexaprotodon liberiensis	Pygmy hippopotamus	56798	Hippopotamidae	Whippomorpha	Artiodactyla	Laurasiatheria	Eutheria	GCA 023065765.1	Chromosome	2022-04-22	ASM2306576v1	northwestern polytechnology university
Hippopotamus amphibius	Hippopotamus	9833	Hippopotamidae	Whippomorpha	Artiodactyla	Laurasiatheria	Eutheria	GCA 023065835.1	Chromosome	2022-04-22	ASM2306583v1	northwestern polytechnology university
Hipposideros armiger	Great roundleaf bat	186990	Hipposideridae	Microchiroptera	Chiroptera	Laurasiatheria	Eutheria	GCF 001890085.2	Scaffold	2016-12-06	ASM189008v1	SKLEC & IECR
Hipposideros galeritus	Cantor's roundleaf bat	58069	Hipposideridae	Microchiroptera	Chiroptera	Laurasiatheria	Eutheria	GCA 004027415.1	Scaffold	2019-01-16	HipGal v1 BIUU	Broad Institute
Hipposideros pendleburyi	Pendlebury's leaf-nosed bat	867831	Hipposideridae	Microchiroptera	Chiroptera	Laurasiatheria	Eutheria	GCA 021464545.1	Scaffold	2022-01-14	ASM2146454v1	National Science and Technology Development Agency
Hippotragus equinus	Roan antelope	37186	Bovidae	Ruminantia	Artiodactyla	Laurasiatheria	Eutheria	GCA 016433095.1	Scaffold	2020-12-29	ASM1643309v1	CIBIO, University of Porto
Hippotragus niger niger	Sable antelope	82127	Bovidae	Ruminantia	Artiodactyla	Laurasiatheria	Eutheria	GCA 006942125.1	Scaffold	2019-07-12	SCBI HNig 1.0	Saint-Petersburg State University
Homo sapiens	Human	9606	Hominidae	Haplorrhini	Primates	Euarchontoglires	Eutheria	GCF 000001405.40	Chromosome	2022-02-03	GRCh38.p14	Genome Reference Consortium
Hoolock leuconedys	Eastern hoolock gibbon	593543	Hylobatidae	Haplorrhini	Primates	Euarchontoglires	Eutheria	GCA 023748175.1	Scaffold	2022-06-16	ASM2374817v1	BGI-Shenzhen
Hyaena hyaena	Striped hyena	95912	Hyaenidae	Feliformia	Carnivora	Laurasiatheria	Eutheria	GCF 003009895.1	Scaffold	2018-03-19	ASM300989v1	Potsdam University
Hydrochoerus hydrochaeris	Capybara	10149	Hydrochaeridae	Hystricomorpha	Rodentia	Euarchontoglires	Eutheria	GCA 004027455.1	Scaffold	2019-01-16	HydHyd v1 BIUU	Broad Institute
Hydrodamalis gigas	Steller's sea cow	63631	Dugongidae	na	Sirenia	Afrotheria	Eutheria	GCA 013391785.1	Scaffold	2020-07-08	H Gigas 1.0	National Research Center Kurchatov Institute
Hydropotes inermis	Chinese water deer	9883	Cervidae	Ruminantia	Artiodactyla	Laurasiatheria	Eutheria	GCA 020226075.1	Chromosome	2021-10-05	ASM2022607v1	Northwestern Polytechnical University
Hylobates moloch	Silvery gibbon	81572	Hylobatidae	Haplorrhini	Primates	Euarchontoglires	Eutheria	GCF 009828535.2	Scaffold	2020-02-13	HMol V2	University of California, Santa Cruz
Hylobates pileatus	Pileated gibbon	9589	Hylobatidae	Haplorrhini	Primates	Euarchontoglires	Eutheria	GCA 021498465.1	Chromosome	2022-01-19	ASM2149846v1	BGI-Shenzhen
Hylomyscus alleni	Allen's wood mouse	34858	Muridae	Myomorpha	Rodentia	Euarchontoglires	Eutheria	GCA 019843855.1	Scaffold	2021-09-01	ASM1984385v1	University of Pennsylvania
Hyperoodon ampullatus	Northern bottlenose whale	48744	Ziphiidae	Whippomorpha	Artiodactyla (Cetacea)	Laurasiatheria	Eutheria	GCA 024363105.1	Scaffold	2022-07-21	DAL HAmp 1	Dalhousie University
Hystrix brachyura	Malayan porcupine	143286	Hystricidae	Hystricomorpha	Rodentia	Euarchontoglires	Eutheria	GCA 016801275.1	Scaffold	2021-02-02	DSBC Hbra 1.0	DNA Stories Bioinformatics Center
Hystrix cristata	Crested porcupine	10137	Hystricidae	Hystricomorpha	Rodentia	Euarchontoglires	Eutheria	GCA 004026905.1	Scaffold	2019-01-16	HysCri v1 BIUU	Broad Institute
Ia io	Great evening bat	360967	Vespertilionidae	Microchiroptera	Chiroptera	Laurasiatheria	Eutheria	GCA 025583905.1	Scaffold	2022-10-05	NENU Iio 1.0	Northeast Normal University
Ictidomys tridecemlineatus	Thirteen-lined ground squirrel	43179	Sciuridae	Sciuromorpha	Rodentia	Euarchontoglires	Eutheria	GCF 016881025.1	Chromosome	2021-02-17	HiC Itri 2	Stanford University School of Medicine
Indri indri	Indri	34827	Indriidae	Strepsirrhini	Primates	Euarchontoglires	Eutheria	GCA 004363605.1	Scaffold	2019-03-22	IndInd v1 BIUU	Broad Institute
Inia geoffrensis	Boutu	9725	Iniidae	Whippomorpha	Artiodactyla (Cetacea)	Laurasiatheria	Eutheria	GCA 004363515.1	Scaffold	2019-03-22	IniGeo v1 BIUU	Broad Institute
Jaculus jaculus	Lesser Egyptian jerboa	51337	Dipodidae	Myomorpha	Rodentia	Euarchontoglires	Eutheria	GCF 020740685.1	Chromosome	2021-11-04	mJacJac1.mat.Y.cur	Vertebrate Genomes Project
Kobus ellipsiprymnus	Waterbuck	9962	Bovidae	Ruminantia	Artiodactyla	Laurasiatheria	Eutheria	GCA 006410655.1	Scaffold	2019-06-24	DFW	Northwestern Polytechnical University
Kobus leche leche	Red lechwe	91880	Bovidae	Ruminantia	Artiodactyla	Laurasiatheria	Eutheria	GCA 014926565.1	Scaffold	2020-10-23	Klec v1.0	Kunming Institute of Zoology
Kogia breviceps	Pygmy sperm whale	27615	Physeteridae	Whippomorpha	Artiodactyla (Cetacea)	Laurasiatheria	Eutheria	GCA 026419965.1	Chromosome	2022-11-27	mKogBre1 haplotype 1	Vertebrate Genomes Project
Lagenorhynchus obliquidens	Pacific white-sided dolphin	3371155	Delphinidae	Whippomorpha	Artiodactyla (Cetacea)	Laurasiatheria	Eutheria	GCF 003676395.1	Scaffold	2018-10-23	ASM367639v1	Canada's Genomic Enterprise
Lagorchestes hirsutus	Rufous hare-wallaby	65632	Macropodidae	na	Diprotodontia	na	Metatheria	GCA 028533205.1	Chromosome	2023-02-09	Lagorchestes hirsutus HiC	DNA Zoo
Lama guanicoe cacsilensis	Guanaco	273908	Camelidae	Tylopoda	Artiodactyla	Laurasiatheria	Eutheria	GCA 013239625.1	Scaffold	2020-06-02	ASM1323962v1	Shanxi Agricultural University
Lasiurus borealis	Red bat	258930	Vespertilionidae	Microchiroptera	Chiroptera	Laurasiatheria	Eutheria	GCA 004026805.1	Scaffold	2019-01-16	LasBor v1 BIUU	Broad Institute
Lemur catta	Ring-tailed lemur	9447	Lemuridae	Strepsirrhini	Primates	Euarchontoglires	Eutheria	GCF 020740605.2	Chromosome	2021-11-04	mLemCat1.pri	Vertebrate Genomes Project
Leontopithecus rosalia	Golden lion tamarin	30588	Cebidae	Haplorrhini	Primates	Euarchontoglires	Eutheria	GCA 028533165.1	Chromosome	2023-02-09	Leontopithecus rosalia HiC	DNA Zoo
Leopardus geoffroyi	Geoffroy's cat	46844	Felidae	Feliformia	Carnivora	Laurasiatheria	Eutheria	GCF 018350155.1	Chromosome	2021-05-13	O.geoffroyi Oge1 pat1.0	Texas A&M University
Leptonychotes weddellii	Weddell seal	9713	Phocidae	Caniformia	Carnivora	Laurasiatheria	Eutheria	GCF 000349705.1	Scaffold	2013-03-29	LepWed1.0	Broad Institute
Lepus americanus	Snowshoe hare	48086	Leporidae	na	Lagomorpha	Euarchontoglires	Eutheria	GCA 004026855.1	Scaffold	2019-01-16	LepAme v1 BIUU	Broad Institute
Lepus timidus	Mountain hare	62621	Leporidae	na	Lagomorpha	Euarchontoglires	Eutheria	GCA 009760805.1	Chromosome	2019-12-17	CIBIO-ISEM LeTim 1.1	CIBIO
Lipotes vexillifer	Yangtze River dolphin	118797	Lipotidae	Whippomorpha	Artiodactyla (Cetacea)	Laurasiatheria	Eutheria	GCF 000442215.2	Scaffold	2013-07-24	Lipotes vexillifer v1.1	BGI
Litocranius walleri	Gerenuk	69311	Bovidae	Ruminantia	Artiodactyla	Laurasiatheria	Eutheria	GCA 006410535.1	Scaffold	2019-06-24	GRK	Northwestern Polytechnical University
Lontra canadensis	Northern American river otter	76717	Mustelidae	Caniformia	Carnivora	Laurasiatheria	Eutheria	GCF 010015895.1	Scaffold	2020-01-27	GSC riverotter 1.0	Canada's Genomic Enterprise
Lophiomys imhausi	Crested rat	248799	Muridae	Myomorpha	Rodentia	Euarchontoglires	Eutheria	GCA 907164525.1	Scaffold	2021-06-03	mLopImh1.curated primary 1811	WELLCOME TRUST SANGER INSTITUTE
Lophocebus aterrimus	Black crested mangabey	75566	Cercopithecidae	Haplorrhini	Primates	Euarchontoglires	Eutheria	GCA 023783235.1	Contig	2022-06-17	ASM2378323v1	BGI-Shenzhen
Loris tardigradus	Slender loris	9468	Lorisidae	Strepsirrhini	Primates	Euarchontoglires	Eutheria	GCA 023783135.1	Contig	2022-06-17	ASM2378313v1	BGI-Shenzhen
Loxodonta africana	African savanna elephant	9785	Elephantidae	na	Proboscidea	Afrotheria	Eutheria	GCF 000001905.1	Scaffold	2009-07-15	Loxafr3.0	Broad Institute
Lutra lutra	Eurasian river otter	9657	Mustelidae	Caniformia	Carnivora	Laurasiatheria	Eutheria	GCF 902655055.1	Chromosome	2020-07-31	mLutLut1.2	SC
Lycaon pictus	African hunting dog	9622	Canidae	Caniformia	Carnivora	Laurasiatheria	Eutheria	GCA 004216515.1	Scaffold	2019-02-20	sis1-161031-pseudohap	Stanford University
Lynx canadensis	Canada lynx	61383	Felidae	Feliformia	Carnivora	Laurasiatheria	Eutheria	GCF 007474595.2	Chromosome	2020-07-14	mLynCan4.pri.v2	Vertebrate Genomes Project
Lynx pardinus	Spanish lynx	191816	Felidae	Feliformia	Carnivora	Laurasiatheria	Eutheria	GCA 900661375.1	Scaffold	2019-03-28	LYPA1.0	CNAG
Lynx rufus	Bobcat	61384	Felidae	Feliformia	Carnivora	Laurasiatheria	Eutheria	GCF 022079265.1	Scaffold	2022-02-08	mLynRuf1.p	UCLA
Macaca arctoides	Stump-tailed macaque	9540	Cercopithecidae	Haplorrhini	Primates	Euarchontoglires	Eutheria	GCA 021188215.1	Scaffold	2021-12-15	Marc 1.0	Sichuan University
Macaca assamensis	Assam macaque	9551	Cercopithecidae	Haplorrhini	Primates	Euarchontoglires	Eutheria	GCA 023783095.1	Contig	2022-06-17	ASM2378309v1	BGI-Shenzhen
Macaca cyclopis	Taiwan macaque	78449	Cercopithecidae	Haplorrhini	Primates	Euarchontoglires	Eutheria	GCA 026956025.1	Chromosome	2022-12-19	MCyc01	Academia Sinica
Macaca fascicularis	Crab-eating macaque	9541	Cercopithecidae	Haplorrhini	Primates	Euarchontoglires	Eutheria	GCF 012559485.2	Chromosome	2021-10-26	MFA1912RKSv2	Keio University / RIKEN
Macaca fuscata fuscata	Japanese macaque	9543	Cercopithecidae	Haplorrhini	Primates	Euarchontoglires	Eutheria	GCA 003118495.1	Contig	2018-04-04	macFus 1.0	National Institutes of Natural Sciences
Macaca mulatta	Rhesus monkey	9544	Cercopithecidae	Haplorrhini	Primates	Euarchontoglires	Eutheria	GCF 003339765.1	Chromosome	2019-02-13	Mmul 10	The Genome Institute at Washington University School of Medicine
Macaca nemestrina	Pig-tailed macaque	9545	Cercopithecidae	Haplorrhini	Primates	Euarchontoglires	Eutheria	GCF 000956065.1	Scaffold	2015-03-19	Mnem 1.0	Baylor College of Medicine
Macaca nigra	Celebes crested macaque	54600	Cercopithecidae	Haplorrhini	Primates	Euarchontoglires	Eutheria	GCA 928851695.1	Scaffold	2022-02-09	mMacNir1.1	IBE (Institut de Biologia Evolutiva)
Macaca silenus	Liontail macaque	54601	Cercopithecidae	Haplorrhini	Primates	Euarchontoglires	Eutheria	GCA 023807365.1	Contig	2022-06-20	ASM2380736v1	BGI-Shenzhen
Macaca thibetana thibetana	Tibetan macaque	257877	Cercopithecidae	Haplorrhini	Primates	Euarchontoglires	Eutheria	GCF 024542745.1	Chromosome	2022-08-09	ASM2454274v1	Sichuan university
Macroglossus sobrinus	Long-tongued fruit bat	326083	Pteropodidae	Megachiroptera	Chiroptera	Laurasiatheria	Eutheria	GCA 004027375.1	Scaffold	2019-01-16	MacSob v1 BIUU	Broad Institute
Macropus fuliginosus	Western gray kangaroo	9316	Macropodidae	na	Diprotodontia	na	Metatheria	GCA 028583105.1	Chromosome	2023-02-10	mf-2k	DNA Zoo
Macropus giganteus	Eastern gray kangaroo	9317	Macropodidae	na	Diprotodontia	na	Metatheria	GCA 028627215.1	Chromosome	2023-02-16	mg-2k	DNA Zoo
Macrotus californicus	California big-eared bat	9419	Phyllostomidae	Microchiroptera	Chiroptera	Laurasiatheria	Eutheria	GCA 007922815.1	Scaffold	2019-08-08	MacCal v1 BIUU	Broad Institute
Madoqua kirkii	Kirk's dik-dik	66434	Bovidae	Ruminantia	Artiodactyla	Laurasiatheria	Eutheria	GCA 006408675.1	Scaffold	2019-06-24	KDD	Northwestern Polytechnical University
Mandrillus leucophaeus	Drill	9568	Cercopithecidae	Haplorrhini	Primates	Euarchontoglires	Eutheria	GCF 000951045.1	Scaffold	2015-03-12	Mleu.le 1.0	Baylor College of Medicine
Mandrillus sphinx	Mandrill	9561	Cercopithecidae	Haplorrhini	Primates	Euarchontoglires	Eutheria	GCA 023783085.1	Contig	2022-06-17	ASM2378308v1	BGI-Shenzhen
Manis crassicaudata	Indian pangolin	1496684	Manidae	na	Pholidota	Laurasiatheria	Eutheria	GCA 016801295.1	Scaffold	2021-02-02	DSBC Mcra 1.0	DNA Stories Bioinformatics Center
Manis javanica	Malayan pangolin	9974	Manidae	na	Pholidota	Laurasiatheria	Eutheria	GCF 014570535.1	Scaffold	2020-09-15	YNU ManJav 2.0	Yunnan University
Manis pentadactyla	Chinese pangolin	143292	Manidae	na	Pholidota	Laurasiatheria	Eutheria	GCF 014570555.1	Scaffold	2020-09-15	YNU ManPten 2.0	Yunnan University
Marmota flaviventris	Yellow-bellied marmot	93162	Sciuridae	Sciuromorpha	Rodentia	Euarchontoglires	Eutheria	GCF 003676075.3	Scaffold	2019-05-24	GSC YBM 2.1	Canada's Genomic Enterprise
Marmota himalayana	Himalayan marmot	93163	Sciuridae	Sciuromorpha	Rodentia	Euarchontoglires	Eutheria	GCA 005280165.1	Scaffold	2019-05-10	ASM528016v1	Xian Jiaotong University Health Science Center
Marmota marmota marmota	Alpine marmot	9994	Sciuridae	Sciuromorpha	Rodentia	Euarchontoglires	Eutheria	GCF 001458135.2	Scaffold	2019-12-18	marMar	MRC NATIONAL INSTITUTE FOR MEDICAL RESEARCH
Marmota monax	Woodchuck	9995	Sciuridae	Sciuromorpha	Rodentia	Euarchontoglires	Eutheria	GCF 021218885.1	Scaffold	2021-12-15	Marmota monax Labrador192 V1.0	Hospital for Sick Children
Marmota vancouverensis	Vancouver Island marmot	93167	Sciuridae	Sciuromorpha	Rodentia	Euarchontoglires	Eutheria	GCA 005458795.1	Scaffold	2019-05-16	GSC VIM 1.0	Canada's Genomic Enterprise
Martes flavigula	Yellow-throated marten	74864	Mustelidae	Caniformia	Carnivora	Laurasiatheria	Eutheria	GCA 029410595.1	Chromosome	2023-03-27	ASM2941059v1	Qufu Normal University
Martes zibellina	Sable	36722	Mustelidae	Caniformia	Carnivora	Laurasiatheria	Eutheria	GCA 012583365.1	Scaffold	2020-04-20	ASM1258336v1	Novogene
Mastomys coucha	Southern multimammate mouse	35658	Muridae	Myomorpha	Rodentia	Euarchontoglires	Eutheria	GCF 008632895.1	Chromosome	2019-09-24	UCSF Mcou 1	University of California, San Francisco
Mastomys natalensis	African soft-furred rat	10112	Muridae	Myomorpha	Rodentia	Euarchontoglires	Eutheria	GCA 021653895.1	Contig	2022-01-27	UFL Mnatal 1.0	University of Florida
Megaderma lyra	Indian false vampire	3371112	Megadermatidae	Microchiroptera	Chiroptera	Laurasiatheria	Eutheria	GCA 004026885.1	Scaffold	2019-01-16	MegLyr v1 BIUU	Broad Institute
Megaptera novaeangliae	Humpback whale	9773	Balaenopteridae	Whippomorpha	Artiodactyla (Cetacea)	Laurasiatheria	Eutheria	GCA 004329385.1	Scaffold	2019-03-06	megNov1	Arizona Cancer Evolution Center (ACE)
Meles meles	Eurasian badger	9662	Mustelidae	Caniformia	Carnivora	Laurasiatheria	Eutheria	GCF 922984935.1	Chromosome	2021-12-19	mMelMel3.1 paternal haplotype	WELLCOME SANGER INSTITUTE
Mellivora capensis	Ratel	9664	Mustelidae	Caniformia	Carnivora	Laurasiatheria	Eutheria	GCA 004024625.1	Scaffold	2019-01-15	MelCap v1 BIUU	Broad Institute
Meriones unguiculatus	Mongolian gerbil	10047	Muridae	Myomorpha	Rodentia	Euarchontoglires	Eutheria	GCF 002204375.1	Scaffold	2017-06-21	MunDraft-v1.0	Lucigen Corp.
Mesocricetus auratus	Golden hamster	10036	Cricetidae	Myomorpha	Rodentia	Euarchontoglires	Eutheria	GCF 017639785.1	Scaffold	2021-03-30	BCM Maur 2.0	Baylor College of Medicine Human Genome Sequencing Center
Mesoplodon bidens	Sowerby's beaked whale	48745	Ziphiidae	Whippomorpha	Artiodactyla (Cetacea)	Laurasiatheria	Eutheria	GCA 004027085.1	Scaffold	2019-01-16	MesBid v1 BIUU	Broad Institute
Mesoplodon densirostris	Blainville's beaked whale	48708	Ziphiidae	Whippomorpha	Artiodactyla (Cetacea)	Laurasiatheria	Eutheria	GCA 025265405.1	Chromosome	2022-09-19	mMesDen1 primary haplotype	Vertebrate Genomes Project
Microcebus griseorufus	Reddish-gray mouse lemur	143354	Cheirogaleidae	Strepsirrhini	Primates	Euarchontoglires	Eutheria	GCA 008750995.1	Scaffold	2019-09-30	Mgri 1.0	Duke University
Microcebus mittermeieri	Mittermeier's mouse lemur	236274	Cheirogaleidae	Strepsirrhini	Primates	Euarchontoglires	Eutheria	GCA 008750955.1	Scaffold	2019-09-30	Mmit 1.0	Duke University
Microcebus murinus	Gray mouse lemur	30608	Cheirogaleidae	Strepsirrhini	Primates	Euarchontoglires	Eutheria	GCF 000165445.2	Chromosome	2017-02-06	Mmur 3.0	Baylor College of Medicine
Microcebus ravelobensis	Golden-brown mouse lemur	122231	Cheirogaleidae	Strepsirrhini	Primates	Euarchontoglires	Eutheria	GCA 008750975.1	Scaffold	2019-09-30	Mrav 1.0	Duke University
Microcebus sp. 3 GT-2019	Mouse lemur	2508170	Cheirogaleidae	Strepsirrhini	Primates	Euarchontoglires	Eutheria	GCA 008750915.1	Scaffold	2019-09-30	Mjon 1.0	Duke University
Microcebus tavaratra	Northern rufous mouse lemur	143351	Cheirogaleidae	Strepsirrhini	Primates	Euarchontoglires	Eutheria	GCA 008750935.1	Scaffold	2019-09-30	Mtav 1.0	Duke University
Micronycteris hirsuta	Hairy big-eared bat	148065	Phyllostomidae	Microchiroptera	Chiroptera	Laurasiatheria	Eutheria	GCA 004026765.1	Scaffold	2019-01-16	MicHir v1 BIUU	Broad Institute
Microtus agrestis	Short-tailed field vole	29092	Cricetidae	Myomorpha	Rodentia	Euarchontoglires	Eutheria	GCA 902806775.1	Contig	2020-02-28	Field vole promethion pilon	LIV
Microtus arvalis	Common vole	47230	Cricetidae	Myomorpha	Rodentia	Euarchontoglires	Eutheria	GCA 007455615.1	Scaffold	2019-07-25	ASM745561v1	Groningen Institute for Evolutionary Life Sciences
Microtus californicus	California vole	100895	Cricetidae	Myomorpha	Rodentia	Euarchontoglires	Eutheria	GCA 028537955.1	Scaffold	2023-02-07	mMicCal1.0.hap1	UCLA
Microtus fortis	Reed vole	100897	Cricetidae	Myomorpha	Rodentia	Euarchontoglires	Eutheria	GCF 014885135.2	Scaffold	2020-10-13	M Fortis MF-2015 v1.1	Shanghai Institute for Biological Sciences, Chinese Academy of Sciences
Microtus montanus	Montane vole	88450	Cricetidae	Myomorpha	Rodentia	Euarchontoglires	Eutheria	GCA 020392405.1	Scaffold	2021-10-08	ASM2039240v1	The Ohio State University
Microtus ochrogaster	Prairie vole	79684	Cricetidae	Myomorpha	Rodentia	Euarchontoglires	Eutheria	GCF 000317375.1	Chromosome	2012-12-07	MicOch1.0	Broad Institute
Microtus oregoni	Creeping vole	111838	Cricetidae	Myomorpha	Rodentia	Euarchontoglires	Eutheria	GCF 018167655.1	Contig	2021-04-26	Mior012	Oklahoma State Universtiy
Microtus richardsoni	Water vole	111840	Cricetidae	Myomorpha	Rodentia	Euarchontoglires	Eutheria	GCA 019206885.2	Scaffold	2023-02-09	ASM1920688v2	IRIDIAN GENOMES
Miniopterus natalensis	Natal long-fingered bat	291302	Vespertilionidae	Microchiroptera	Chiroptera	Laurasiatheria	Eutheria	GCF 001595765.1	Scaffold	2016-03-22	Mnat.v1	University of California, San Francisco
Miniopterus schreibersii	Schreibers' long-fingered bat	9433	Vespertilionidae	Microchiroptera	Chiroptera	Laurasiatheria	Eutheria	GCA 004026525.1	Scaffold	2019-01-16	MinSch v1 BIUU	Broad Institute
Miopithecus talapoin	Talapoin	36231	Cercopithecidae	Haplorrhini	Primates	Euarchontoglires	Eutheria	GCA 028551445.1	Chromosome	2023-02-09	Miopithecus talapoin HiC	DNA Zoo
Mirounga angustirostris	Northern elephant seal	9716	Phocidae	Caniformia	Carnivora	Laurasiatheria	Eutheria	GCF 021288785.2	Chromosome	2022-12-21	ASM2128878v3	DNA Zoo
Mirounga leonina	Southern elephant seal	9715	Phocidae	Caniformia	Carnivora	Laurasiatheria	Eutheria	GCF 011800145.1	Scaffold	2020-03-31	KU Mleo 1.0	Earth Biogenome Project
Mirza coquereli	Coquerel's mouse lemur	47180	Cheirogaleidae	Strepsirrhini	Primates	Euarchontoglires	Eutheria	GCA 004024645.1	Scaffold	2019-01-15	MizCoq v1 BIUU	Broad Institute
Mirza zaza	Northern giant mouse lemur	339999	Cheirogaleidae	Strepsirrhini	Primates	Euarchontoglires	Eutheria	GCA 008750895.1	Scaffold	2019-09-30	Mzaz 1.0	Duke University
Molossus molossus	Pallas's mastiff bat	27622	Molossidae	Microchiroptera	Chiroptera	Laurasiatheria	Eutheria	GCF 014108415.1	Scaffold	2020-08-07	mMolMol1.p	Bat1K
Monodelphis domestica	Gray short-tailed opossum	13616	Didelphidae	na	Didelphimorphia	na	Metatheria	GCF 000002295.2	Chromosome	2007-01-25	MonDom5	The Genome Sequencing Platform, The Genome Assembly Team
Monodon monoceros	Narwhal	40151	Monodontidae	Whippomorpha	Artiodactyla (Cetacea)	Laurasiatheria	Eutheria	GCF 005190385.1	Scaffold	2019-05-06	NGI Narwhal 1	The Narwhal Genome Initiative
Mormoops blainvillei	Antillean ghost-faced bat	118852	Mormoopidae	Microchiroptera	Chiroptera	Laurasiatheria	Eutheria	GCA 004026545.1	Scaffold	2019-01-16	MorMeg v1 BIUU	Broad Institute
Moschus berezovskii	Chinese forest musk deer	68408	Moschidae	Ruminantia	Artiodactyla	Laurasiatheria	Eutheria	GCA 022376915.1	Scaffold	2022-02-23	ASM2237691v1	Northwestern Polytechnical University
Moschus chrysogaster	Alpine musk deer	68412	Moschidae	Ruminantia	Artiodactyla	Laurasiatheria	Eutheria	GCA 006461725.1	Scaffold	2019-06-25	NPU MCHR 1.0	Northwestern Polytechnical University
Moschus moschiferus	Siberian musk deer	68415	Moschidae	Ruminantia	Artiodactyla	Laurasiatheria	Eutheria	GCA 004024705.2	Scaffold	2019-07-15	MosMos v2 BIUU UCD	Broad Institute
Mungos mungo	Banded mongoose	210652	Herpestidae	Feliformia	Carnivora	Laurasiatheria	Eutheria	GCA 004023785.1	Scaffold	2019-01-15	MunMun v1 BIUU	Broad Institute
Muntiacus crinifrons	Black muntjac	71854	Cervidae	Ruminantia	Artiodactyla	Laurasiatheria	Eutheria	GCA 020276665.1	Chromosome	2021-10-05	ASM2027666v1	Northwestern Polytechnical University
Muntiacus gongshanensis	Gongshanensis muntjac	145526	Cervidae	Ruminantia	Artiodactyla	Laurasiatheria	Eutheria	GCA 020226025.1	Scaffold	2021-10-04	ASM2022602v1	Northwestern Polytechnical University
Muntiacus muntjak	Muntjak	9888	Cervidae	Ruminantia	Artiodactyla	Laurasiatheria	Eutheria	GCA 008782695.1	Chromosome	2019-10-07	UCB Mmun 1.0	University of California, Berkeley
Muntiacus reevesi	Reeves' muntjac	9886	Cervidae	Ruminantia	Artiodactyla	Laurasiatheria	Eutheria	GCA 020226045.1	Chromosome	2021-10-05	ASM2022604v1	Northwestern Polytechnical University
Murina aurata feae	Ask gray tube-nosed bat	1453894	Vespertilionidae	Microchiroptera	Chiroptera	Laurasiatheria	Eutheria	GCA 004026665.1	Scaffold	2019-01-16	MurFea v1 BIUU	Broad Institute
Mus caroli	Ryukyu mouse	10089	Muridae	Myomorpha	Rodentia	Euarchontoglires	Eutheria	GCF 900094665.2	Chromosome	2017-04-28	CAROLI EIJ v1.1	European Bioinformatics Institute
Mus minutoides	Southern African pygmy mouse	10105	Muridae	Myomorpha	Rodentia	Euarchontoglires	Eutheria	GCA 902729485.2	Scaffold	2020-09-25	Mus minutoides I2396 v1	INSTITUT DES SCIENCES DE L'EVOLUTION DE MONTPELLIER, UNIVERSITE DE MONTPELLIER, CNRS-EPHE-IRD-UM
Mus musculus	House mouse	10090	Muridae	Myomorpha	Rodentia	Euarchontoglires	Eutheria	GCF 000001635.27	Chromosome	2020-06-24	GRCm39	Genome Reference Consortium
Mus pahari	Shrew mouse	10093	Muridae	Myomorpha	Rodentia	Euarchontoglires	Eutheria	GCF 900095145.1	Chromosome	2017-04-28	PAHARI EIJ v1.1	EBI
Mus spicilegus	Steppe mouse	10103	Muridae	Myomorpha	Rodentia	Euarchontoglires	Eutheria	GCA 003336285.1	Scaffold	2018-07-23	MUSP714	Oklahoma State Universtiy
Mus spretus	Western wild mouse	10096	Muridae	Myomorpha	Rodentia	Euarchontoglires	Eutheria	GCA 921997135.2	Chromosome	2022-06-30	SPRET EiJ v3	EMBL-EBI, WELLCOME TRUST GENOME CAMPUS, CAMBRIDGE
Muscardinus avellanarius	Hazel dormouse	39082	Gliridae	Sciuromorpha	Rodentia	Euarchontoglires	Eutheria	GCA 004027005.1	Scaffold	2019-01-16	MusAve v1 BIUU	Broad Institute
Mustela erminea	Ermine	36723	Mustelidae	Caniformia	Carnivora	Laurasiatheria	Eutheria	GCF 009829155.1	Chromosome	2020-01-03	mMusErm1.Pri	Vertebrate Genomes Project
Mustela nigripes	Black-footed ferret	77151	Mustelidae	Caniformia	Carnivora	Laurasiatheria	Eutheria	GCA 022355385.1	Chromosome	2022-02-24	MUSNIG.SB6536	Smithsonian Institution
Mustela nivalis	Least weasel	36239	Mustelidae	Caniformia	Carnivora	Laurasiatheria	Eutheria	GCA 019141155.1	Scaffold	2021-07-06	MusNiv Pri1.0	CIBIO-InBIO
Mustela putorius furo	Domestic ferret	9669	Mustelidae	Caniformia	Carnivora	Laurasiatheria	Eutheria	GCF 011764305.1	Contig	2020-03-27	ASM1176430v1.1	JCVI
Myocastor coypus	Nutria	10157	Myocastoridae	Hystricomorpha	Rodentia	Euarchontoglires	Eutheria	GCA 004027025.1	Scaffold	2019-01-16	MyoCoy v1 BIUU	Broad Institute
Myodes glareolus	Bank vole	447135	Cricetidae	Myomorpha	Rodentia	Euarchontoglires	Eutheria	GCF 902806735.1	Scaffold	2020-02-22	Bank vole1 10x	LIV
Myotis brandtii	Brandt's bat	109478	Vespertilionidae	Microchiroptera	Chiroptera	Laurasiatheria	Eutheria	GCF 000412655.1	Scaffold	2013-06-28	ASM41265v1	BGI
Myotis davidii	David's myotis	225400	Vespertilionidae	Microchiroptera	Chiroptera	Laurasiatheria	Eutheria	GCF 000327345.1	Scaffold	2012-12-20	ASM32734v1	BGI
Myotis lucifugus	Little brown bat	59463	Vespertilionidae	Microchiroptera	Chiroptera	Laurasiatheria	Eutheria	GCF 000147115.1	Scaffold	2010-09-14	Myoluc2.0	Broad Institute
Myotis myotis	Greater mouse-eared bat	51298	Vespertilionidae	Microchiroptera	Chiroptera	Laurasiatheria	Eutheria	GCF 014108235.1	Scaffold	2020-08-07	mMyoMyo1.p	Bat1K
Myotis yumanensis	Yuma myotis	159337	Vespertilionidae	Microchiroptera	Chiroptera	Laurasiatheria	Eutheria	GCA 028538775.1	Scaffold	2023-02-10	mMyoYum1.0.hap1	UCLA
Myrmecobius fasciatus	Numbat	55782	Myrmecobiidae	na	Dasyuromorphia	na	Metatheria	GCA 023553655.1	Scaffold	2022-05-25	mMyrfas1.20211206	The University of Sydney
Myrmecophaga tridactyla	Giant anteater	71006	Myrmecophagidae	Vermilingua	Pilosa	Xenarthra	Eutheria	GCA 004026745.1	Scaffold	2019-01-16	MyrTri v1 BIUU	Broad Institute
Nanger dama	Dama gazelle	67940	Bovidae	Ruminantia	Artiodactyla	Laurasiatheria	Eutheria	GCA 917880005.1	Scaffold	2021-11-18	ORGONE 02	IBE (Institut de Biologia Evolutiva)
Nanger granti	Grant's gazelle	27591	Bovidae	Ruminantia	Artiodactyla	Laurasiatheria	Eutheria	GCA 006408635.1	Scaffold	2019-06-24	GTG	Northwestern Polytechnical University
Nannospalax galili	Upper Galilee mountains blind mole rat	1026970	Spalacidae	Myomorpha	Rodentia	Euarchontoglires	Eutheria	GCF 000622305.1	Scaffold	2014-06-05	S.galili v1.0	BGI
Nasalis larvatus	Proboscis monkey	43780	Cercopithecidae	Haplorrhini	Primates	Euarchontoglires	Eutheria	GCA 000772465.1	Chromosome	2014-11-10	Charlie1.0	Proboscis Monkey Functional Genome Consortium
Neodon shergylaensis	Shergyla mountain vole	2613871	Cricetidae	Myomorpha	Rodentia	Euarchontoglires	Eutheria	GCA 025134845.1	Scaffold	2022-09-02	SAF Nshe 1.1	BGI
Neofelis diardi	Sunda clouded leopard	427616	Felidae	Feliformia	Carnivora	Laurasiatheria	Eutheria	GCA 027422475.1	Scaffold	2022-12-27	ASM2742247v1	Smithsonian Institution
Neofelis nebulosa	Clouded leopard	61452	Felidae	Feliformia	Carnivora	Laurasiatheria	Eutheria	GCA 028018385.1	Chromosome	2023-01-31	mNeoNeb1.pri	Vertebrate Genomes Project
Neogale vison	American mink	452646	Mustelidae	Caniformia	Carnivora	Laurasiatheria	Eutheria	GCF 020171115.1	Chromosome	2021-09-29	ASM NN V1	Dalhousie University
Neomonachus schauinslandi	Hawaiian monk seal	29088	Phocidae	Caniformia	Carnivora	Laurasiatheria	Eutheria	GCF 002201575.2	Chromosome	2021-10-20	ASM220157v2	Johns Hopkins University
Neophocaena asiaeorientalis asiaeorientalis	Yangtze finless porpoise	1706337	Phocoenidae	Whippomorpha	Artiodactyla (Cetacea)	Laurasiatheria	Eutheria	GCF 003031525.2	Scaffold	2018-04-03	Neophocaena asiaeorientalis V1.1	Nanjing normal university
Neotoma lepida	Desert woodrat	56216	Cricetidae	Myomorpha	Rodentia	Euarchontoglires	Eutheria	GCA 001675575.1	Scaffold	2016-06-23	ASM167557v1	University of Utah
Neotragus moschatus	Suni	66442	Bovidae	Ruminantia	Artiodactyla	Laurasiatheria	Eutheria	GCA 006410615.1	Scaffold	2019-06-24	SUN	Northwestern Polytechnical University
Neotragus pygmaeus	Royal antelope	1027985	Bovidae	Ruminantia	Artiodactyla	Laurasiatheria	Eutheria	GCA 006410875.1	Scaffold	2019-06-24	RAL	Northwestern Polytechnical University
Nesogale talazaci	Talazac's shrew tenrec	2583312	Tenrecidae	na	na	Afrotheria	Eutheria	GCA 004026705.1	Scaffold	2019-01-16	MicTal v1 BIUU	Broad Institute
Noctilio leporinus	Greater bulldog bat	94963	Noctilionidae	Microchiroptera	Chiroptera	Laurasiatheria	Eutheria	GCA 004026585.1	Scaffold	2019-01-16	NocLep v1 BIUU	Broad Institute
Nomascus leucogenys	Northern white-cheeked gibbon	61853	Hylobatidae	Haplorrhini	Primates	Euarchontoglires	Eutheria	GCF 006542625.1	Chromosome	2019-07-02	Asia NLE v1	University of Washington
Nomascus siki	Southern white-cheeked gibbon	9586	Hylobatidae	Haplorrhini	Primates	Euarchontoglires	Eutheria	GCA 023783065.1	Scaffold	2022-06-17	ASM2378306v1	BGI-Shenzhen
Notamacropus eugenii	Tammar wallaby	9315	Macropodidae	na	Diprotodontia	na	Metatheria	GCA 028372415.1	Chromosome	2023-02-06	mMacEug1.pri	Vertebrate Genomes Project
Nyctereutes procyonoides	Raccoon dog	34880	Canidae	Caniformia	Carnivora	Laurasiatheria	Eutheria	GCA 905146905.1	Scaffold	2021-02-14	NYPRO anot genome	Senckenber Biodiversity and Climate Research Centre Frankfurt
Nycticebus bengalensis	Bengal slow loris	261741	Lorisidae	Strepsirrhini	Primates	Euarchontoglires	Eutheria	GCA 023898255.1	Chromosome	2022-06-27	ASM2389825v1	BGI-Shenzhen
Nycticebus coucang	Slow loris	9470	Lorisidae	Strepsirrhini	Primates	Euarchontoglires	Eutheria	GCF 027406575.1	Chromosome	2022-12-28	mNycCou1.pri	Vertebrate Genomes Project
Nycticeius humeralis	Evening bat	27670	Vespertilionidae	Microchiroptera	Chiroptera	Laurasiatheria	Eutheria	GCA 007922795.1	Scaffold	2019-08-08	NycHum v1 BIUU	Broad Institute
Ochotona curzoniae	Black-lipped pika	130825	Ochotonidae	na	Lagomorpha	Euarchontoglires	Eutheria	GCF 017591425.1	Scaffold	2021-03-26	NIBS Ocur 1.0	National Institute of Biological Sciences, Beijing
Ochotona princeps	American pika	9978	Ochotonidae	na	Lagomorpha	Euarchontoglires	Eutheria	GCF 014633375.1	Chromosome	2020-09-21	OchPri4.0	University of British Columbia Okanagan
Octodon degus	Degu	10160	Octodontidae	Hystricomorpha	Rodentia	Euarchontoglires	Eutheria	GCF 000260255.1	Scaffold	2012-05-01	OctDeg1.0	Broad Institute
Octomys mimax	Viscacha rat	135583	Octodontidae	Hystricomorpha	Rodentia	Euarchontoglires	Eutheria	GCA 002564305.1	Scaffold	2017-10-17	Oct mimax AO248 v1	McMaster University
Odobenus rosmarus divergens	Pacific walrus	9708	Odobenidae	Caniformia	Carnivora	Laurasiatheria	Eutheria	GCF 000321225.1	Scaffold	2013-01-16	Oros 1.0	Marine mammals
Odocoileus hemionus	Mule deer	9872	Cervidae	Ruminantia	Artiodactyla	Laurasiatheria	Eutheria	GCA 020976825.1	Chromosome	2021-11-30	BYU Ohem 2021	Brigham Young University
Odocoileus virginianus texanus	Texas white-tailed deer	9880	Cervidae	Ruminantia	Artiodactyla	Laurasiatheria	Eutheria	GCF 002102435.1	Scaffold	2017-04-20	Ovir.te 1.0	Baylor College of Medicine
Okapia johnstoni	Okapi	86973	Giraffidae	Ruminantia	Artiodactyla	Laurasiatheria	Eutheria	GCA 024291935.2	Chromosome	2022-07-16	TBG Okapi asm v1	Senckenberg Nature Research Society
Ondatra zibethicus	Muskrat	10060	Cricetidae	Myomorpha	Rodentia	Euarchontoglires	Eutheria	GCA 004026605.1	Scaffold	2019-01-16	OndZib v1 BIUU	Broad Institute
Onychomys torridus	Southern grasshopper mouse	38674	Cricetidae	Myomorpha	Rodentia	Euarchontoglires	Eutheria	GCF 903995425.1	Chromosome	2020-08-21	mOncTor1.1	SC
Orcinus orca	Killer whale	9733	Delphinidae	Whippomorpha	Artiodactyla (Cetacea)	Laurasiatheria	Eutheria	GCF 937001465.1	Chromosome	2022-05-03	mOrcOrc1.1	WELLCOME SANGER INSTITUTE
Oreamnos americanus	Mountain goat	34873	Bovidae	Ruminantia	Artiodactyla	Laurasiatheria	Eutheria	GCA 009758055.1	Scaffold	2019-12-16	ASM975805v1	Trent University
Oreotragus oreotragus	Klipspringer	66444	Bovidae	Ruminantia	Artiodactyla	Laurasiatheria	Eutheria	GCA 006410675.1	Scaffold	2019-06-24	KSP	Northwestern Polytechnical University
Orientallactaga bullata	Gobi jerboa	1041416	Dipodidae	Myomorpha	Rodentia	Euarchontoglires	Eutheria	GCA 004027895.1	Scaffold	2019-01-16	AllBul v1 BIUU	Broad Institute
Ornithorhynchus anatinus	Platypus	9258	Ornithorhynchidae	na	Monotremata	na	Prototheria	GCF 004115215.2	Chromosome	2020-11-06	mOrnAna1.pri.v4	Vertebrate Genomes Project
Orycteropus afer afer	Aardvark	1230840	Orycteropodidae	na	Tubulidentata	Afrotheria	Eutheria	GCF 000298275.1	Scaffold	2012-09-20	OryAfe1.0	Broad Institute
Oryctolagus cuniculus	Rabbit	9986	Leporidae	na	Lagomorpha	Euarchontoglires	Eutheria	GCF 009806435.1	Chromosome	2021-02-04	UM NZW 1.0	Shanghai Institutes for Biological Sciences
Oryx dammah	Scimitar-horned oryx	59534	Bovidae	Ruminantia	Artiodactyla	Laurasiatheria	Eutheria	GCF 014754425.2	Scaffold	2020-09-25	SCBI Odam 1.1	Smithsonian Conservation Biology Institute
Oryx gazella	Gemsbok	9958	Bovidae	Ruminantia	Artiodactyla	Laurasiatheria	Eutheria	GCA 003945745.1	Scaffold	2018-12-14	UCDavis Ogaz 1	University of California Davis
Otocolobus manul	Pallas's cat	61408	Felidae	Feliformia	Carnivora	Laurasiatheria	Eutheria	GCA 028564725.1	Scaffold	2023-02-09	OtoMan p1.0	University of Minnnesota
Otocyon megalotis megalotis	Bat-eared fox	2793302	Canidae	Caniformia	Carnivora	Laurasiatheria	Eutheria	GCA 017311455.1	Scaffold	2021-03-09	Otocyon megalotis TS305 17 09 2019	CNRS
Otolemur garnettii	Small-eared galago	30611	Galagidae	Strepsirrhini	Primates	Euarchontoglires	Eutheria	GCF 000181295.1	Scaffold	2011-03-16	OtoGar3	Broad Institute of MIT and Harvard, USA, Cambridge
Ourebia ourebi	Oribi	59536	Bovidae	Ruminantia	Artiodactyla	Laurasiatheria	Eutheria	GCA 006417275.1	Scaffold	2019-06-24	ORB	Northwestern Polytechnical University
Ovibos moschatus	Muskox	37176	Bovidae	Ruminantia	Artiodactyla	Laurasiatheria	Eutheria	GCA 021462335.1	Scaffold	2022-01-13	ASM2146233v1	Northwest A&F University
Ovis ammon polii x Ovis aries	Hybrid sheep	2918886	Bovidae	Ruminantia	Artiodactyla	Laurasiatheria	Eutheria	GCA 023701675.1	Chromosome	2022-06-10	CAU F1 maternal 1.0	China Agricultural University
Ovis aries	Sheep	9940	Bovidae	Ruminantia	Artiodactyla	Laurasiatheria	Eutheria	GCF 016772045.1	Chromosome	2021-02-03	ARS-UI Ramb v2.0	University of Idaho
Ovis canadensis	Bighorn sheep	37174	Bovidae	Ruminantia	Artiodactyla	Laurasiatheria	Eutheria	GCA 004026945.1	Scaffold	2019-01-16	OviCan v1 BIUU	Broad Institute
Ovis nivicola lydekkeri	Snow sheep	1867112	Bovidae	Ruminantia	Artiodactyla	Laurasiatheria	Eutheria	GCA 903231385.1	Scaffold	2020-06-16	OvNiv1.0	LMU Munich
Ovis orientalis	Asiatic mouflon	469796	Bovidae	Ruminantia	Artiodactyla	Laurasiatheria	Eutheria	GCA 014523465.1	Chromosome	2020-09-11	CAU Oori 1.0	INSTITUTE OF ZOOLOGY, CHINESE ACADEMY OF SCIENCES
Pan paniscus	Pygmy chimpanzee	9597	Hominidae	Haplorrhini	Primates	Euarchontoglires	Eutheria	GCF 013052645.1	Chromosome	2020-05-15	Mhudiblu PPA v0	University of Washington, University of Bari, Italy
Pan troglodytes	Chimpanzee	9598	Hominidae	Haplorrhini	Primates	Euarchontoglires	Eutheria	GCF 002880755.1	Chromosome	2018-01-19	Clint PTRv2	University of Washington
Panthera leo	Lion	9689	Felidae	Feliformia	Carnivora	Laurasiatheria	Eutheria	GCF 018350215.1	Chromosome	2021-05-13	P.leo Ple1 pat1.1	Texas A&M University
Panthera onca	Jaguar	9690	Felidae	Feliformia	Carnivora	Laurasiatheria	Eutheria	GCA 028533385.1	Chromosome	2023-02-09	Panthera onca HiC	DNA Zoo
Panthera pardus	Leopard	9691	Felidae	Feliformia	Carnivora	Laurasiatheria	Eutheria	GCF 024362965.1	Scaffold	2022-07-21	ASM2436296v1	Stanford University
Panthera tigris	Tiger	9694	Felidae	Feliformia	Carnivora	Laurasiatheria	Eutheria	GCF 018350195.1	Chromosome	2021-05-13	P.tigris Pti1 mat1.1	Texas A&M University
Panthera uncia	Snow leopard	29064	Felidae	Feliformia	Carnivora	Laurasiatheria	Eutheria	GCF 023721935.1	Chromosome	2022-06-16	Puncia PCG 1.0	Stanford University
Papio anubis	Olive baboon	9555	Cercopithecidae	Haplorrhini	Primates	Euarchontoglires	Eutheria	GCF 008728515.1	Chromosome	2019-10-02	Panubis1.0	University of California, San Francisco
Papio hamadryas	Hamadryas baboon	9557	Cercopithecidae	Haplorrhini	Primates	Euarchontoglires	Eutheria	GCA 023781915.1	Contig	2022-06-17	ASM2378191v1	BGI-Shenzhen
Papio papio	Guinea baboon	100937	Cercopithecidae	Haplorrhini	Primates	Euarchontoglires	Eutheria	GCA 028645565.1	Chromosome	2023-02-16	Papio papio HiC	DNA Zoo
Paradoxurus hermaphroditus	Asian palm civet	71117	Viverridae	Feliformia	Carnivora	Laurasiatheria	Eutheria	GCA 004024585.1	Scaffold	2019-01-15	ParHer v1 BIUU	Broad Institute
Pedetes capensis	Springhare	10023	Pedetidae	Anomaluromorpha	Rodentia	Euarchontoglires	Eutheria	GCA 007922755.1	Scaffold	2019-08-08	PedCap v1 BIUU	Broad Institute
Perognathus longimembris pacificus	Pacific pocket mouse	214514	Heteromyidae	Castorimorpha	Rodentia	Euarchontoglires	Eutheria	GCF 023159225.1	Chromosome	2022-04-27	ASM2315922v1	San Diego Zoo Wildlife Alliance
Peromyscus attwateri	Texas deermouse	97206	Cricetidae	Myomorpha	Rodentia	Euarchontoglires	Eutheria	GCA 902168425.1	Scaffold	2019-08-20	Patt 10x v1	UNIVERSITY OF NEW HAMPSHIRE
Peromyscus aztecus	Aztec mouse	57100	Cricetidae	Myomorpha	Rodentia	Euarchontoglires	Eutheria	GCA 902168405.1	Scaffold	2019-08-22	Pazt 10x v1	UNIVERSITY OF NEW HAMPSHIRE
Peromyscus californicus insignis	California deermouse	564181	Cricetidae	Myomorpha	Rodentia	Euarchontoglires	Eutheria	GCF 007827085.1	Scaffold	2022-04-27	ASM782708v3	University of Maryland
Peromyscus eremicus	Cactus mouse	42410	Cricetidae	Myomorpha	Rodentia	Euarchontoglires	Eutheria	GCA 902702925.1	Scaffold	2019-11-26	Peer1.7.4	UNIVERSITY OF NEW HAMPSHIRE
Peromyscus leucopus	White-footed mouse	10041	Cricetidae	Myomorpha	Rodentia	Euarchontoglires	Eutheria	GCF 004664715.2	Chromosome	2020-10-02	UCI PerLeu 2.1	University of California Irvine
Peromyscus maniculatus bairdii	Prairie deer mouse	230844	Cricetidae	Myomorpha	Rodentia	Euarchontoglires	Eutheria	GCF 003704035.1	Chromosome	2020-09-17	HU Pman 2.1.3	Harvard University / Howard Hughes Medical Institute
Peromyscus melanophrys	Plateau mouse	246392	Cricetidae	Myomorpha	Rodentia	Euarchontoglires	Eutheria	GCA 902168415.1	Scaffold	2019-08-20	Pmel 10x v1	UNIVERSITY OF NEW HAMPSHIRE
Peromyscus nudipes	Mexican deer mouse	162314	Cricetidae	Myomorpha	Rodentia	Euarchontoglires	Eutheria	GCA 902168325.1	Scaffold	2019-08-20	Pnud 10x v1	UNIVERSITY OF NEW HAMPSHIRE
Peromyscus polionotus subgriseus	Oldfield mouse	369710	Cricetidae	Myomorpha	Rodentia	Euarchontoglires	Eutheria	GCA 003704135.2	Chromosome	2019-04-26	HU Ppol 1.3.3	Harvard University / Howard Hughes Medical Institute
Petromus typicus	Dassie-rat	10183	Petromuridae	Hystricomorpha	Rodentia	Euarchontoglires	Eutheria	GCA 004026965.1	Scaffold	2019-01-16	PetTyp v1 BIUU	Broad Institute
Phacochoerus africanus	Common warthog	41426	Suidae	Suina	Artiodactyla	Laurasiatheria	Eutheria	GCF 016906955.1	Chromosome	2021-02-19	ROS Pafr v1	The Roslin Institute
Phalanger gymnotis	Ground cuscus	65615	Phalangeridae	na	Diprotodontia	na	Metatheria	GCA 028646595.1	Chromosome	2023-02-16	pg-2k	DNA Zoo
Phascolarctos cinereus	Koala	38626	Phascolarctidae	na	Diprotodontia	na	Metatheria	GCF 002099425.1	Contig	2017-04-18	phaCin unsw v4.1	The Earlham Institute
Phataginus tricuspis	Tree pangolin	358128	Manidae	na	Pholidota	Laurasiatheria	Eutheria	GCA 004765945.2	Scaffold	2022-11-10	mPhaTri1	Broad Institute
Philantomba maxwellii	Maxwell's duiker	907741	Bovidae	Ruminantia	Artiodactyla	Laurasiatheria	Eutheria	GCA 006410695.1	Scaffold	2019-06-24	MXD	Northwestern Polytechnical University
Phoca vitulina	Harbor seal	9720	Phocidae	Caniformia	Carnivora	Laurasiatheria	Eutheria	GCF 004348235.1	Scaffold	2019-02-11	GSC HSeal 1.0	Canada's Genome Enterprise (CGEN)
Phocoena phocoena	Harbor porpoise	9742	Phocoenidae	Whippomorpha	Artiodactyla (Cetacea)	Laurasiatheria	Eutheria	GCA 004363495.1	Scaffold	2019-03-22	PhoPho v1 BIUU	Broad Institute
Phocoena sinus	Vaquita	42100	Phocoenidae	Whippomorpha	Artiodactyla (Cetacea)	Laurasiatheria	Eutheria	GCF 008692025.1	Chromosome	2019-09-26	mPhoSin1.pri	Vertebrate Genomes Project
Phodopus roborovskii	Desert hamster	109678	Cricetidae	Myomorpha	Rodentia	Euarchontoglires	Eutheria	GCF 943737965.1	Contig	2022-07-01	PHOROB	FREIE UNIVERSITAET BERLIN
Phodopus sungorus	Winter white dwarf hamster	10044	Cricetidae	Myomorpha	Rodentia	Euarchontoglires	Eutheria	GCA 023856395.1	Chromosome	2022-06-29	Psun UM 1.1	University Of Montana
Phyllostomus discolor	Pale spear-nosed bat	89673	Phyllostomidae	Microchiroptera	Chiroptera	Laurasiatheria	Eutheria	GCF 004126475.2	Chromosome	2020-05-12	mPhyDis1.pri.v3	Vertebrate Genomes Project
Phyllostomus hastatus	Greater spear-nosed bat	9423	Phyllostomidae	Microchiroptera	Chiroptera	Laurasiatheria	Eutheria	GCF 019186645.2	Scaffold	2021-07-09	TTU PhHast 1.1	Texas Tech University
Piliocolobus tephrosceles	Ugandan red Colobus	591936	Cercopithecidae	Haplorrhini	Primates	Euarchontoglires	Eutheria	GCF 002776525.5	Chromosome	2019-12-12	ASM277652v5	University of Oregon
Pipistrellus kuhlii	Kuhl's pipistrelle	59472	Vespertilionidae	Microchiroptera	Chiroptera	Laurasiatheria	Eutheria	GCF 014108245.1	Scaffold	2020-08-07	mPipKuh1.p	Bat1K
Pipistrellus pipistrellus	Common pipistrelle	59474	Vespertilionidae	Microchiroptera	Chiroptera	Laurasiatheria	Eutheria	GCA 903992545.1	Chromosome	2020-08-06	mPipPip1.1	SC
Pithecia pithecia	White-faced saki	43777	Pitheciidae	Haplorrhini	Primates	Euarchontoglires	Eutheria	GCA 023779675.1	Contig	2022-06-17	ASM2377967v1	BGI-Shenzhen
Platanista gangetica	Ganges River dolphin	118798	Platanistidae	Whippomorpha	Artiodactyla (Cetacea)	Laurasiatheria	Eutheria	GCA 017311385.1	Contig	2021-03-09	HRRL Platanista gangetica 1.0	Chittagong Veterinary and Animal Sciences University; University of Chittagong (HRRL)
Platanista minor	Indus River dolphin	48752	Platanistidae	Whippomorpha	Artiodactyla (Cetacea)	Laurasiatheria	Eutheria	GCA 004363435.1	Scaffold	2019-03-22	PlaMin v1 BIUU	Broad Institute
Plecturocebus donacophilus	Bolivian titi	230833	Pitheciidae	Haplorrhini	Primates	Euarchontoglires	Eutheria	GCA 004027715.1	Scaffold	2019-01-16	CalDon v1 BIUU	Broad Institute
Pongo abelii	Sumatran orangutan	9601	Hominidae	Haplorrhini	Primates	Euarchontoglires	Eutheria	GCF 028885655.1	Chromosome	2023-02-28	NHGRI mPonAbe1-v1.1-hic.freeze pri	National Human Genome Research Institute, National Institutes of Health
Pongo pygmaeus	Bornean orangutan	9600	Hominidae	Haplorrhini	Primates	Euarchontoglires	Eutheria	GCF 028885625.1	Chromosome	2023-02-28	NHGRI mPonPyg2-v1.1-hic.freeze pri	National Human Genome Research Institute, National Institutes of Health
Pontoporia blainvillei	Franciscana	48723	Pontoporiidae	Whippomorpha	Artiodactyla (Cetacea)	Laurasiatheria	Eutheria	GCA 011754075.1	Scaffold	2020-03-25	ASM1175407v1	Universidade do Vale do Itajai (UNIVALI)
Potos flavus	Kinkajou	29067	Procyonidae	Caniformia	Carnivora	Laurasiatheria	Eutheria	GCA 028534135.1	Chromosome	2023-02-09	Potos flavus HiC	DNA Zoo
Praomys delectorum	Delectable soft-furred mouse	119565	Muridae	Myomorpha	Rodentia	Euarchontoglires	Eutheria	GCA 019843815.1	Scaffold	2021-09-01	ASM1984381v1	University of Pennsylvania
Prionailurus bengalensis	Leopard cat	37029	Felidae	Feliformia	Carnivora	Laurasiatheria	Eutheria	GCF 016509475.1	Chromosome	2021-01-06	Fcat Pben 1.1 paternal pri	Texas A&M University
Prionailurus iriomotensis	Iriomote cat	37030	Felidae	Feliformia	Carnivora	Laurasiatheria	Eutheria	GCA 018403415.1	Scaffold	2021-03-31	P iriomotensis scaffold 01	Environmental Genomics Office Center for Environmetal Biology and Ecosystem Studies, National Institute for Environmental Studies
Prionailurus viverrinus	Fishing cat	61388	Felidae	Feliformia	Carnivora	Laurasiatheria	Eutheria	GCF 022837055.1	Chromosome	2022-04-08	UM Priviv 1.0	University of Missouri
Procapra przewalskii	Przewalski's gazelle	157668	Bovidae	Ruminantia	Artiodactyla	Laurasiatheria	Eutheria	GCA 006410515.1	Scaffold	2019-06-24	PLG	Northwestern Polytechnical University
Procavia capensis	Cape rock hyrax	9813	Procaviidae	na	Hyracoidea	Afrotheria	Eutheria	GCA 004026925.3	Scaffold	2022-11-08	ProCapCap v3 BIUU UCD	Broad Institute
Procyon lotor	Raccoon	9654	Procyonidae	Caniformia	Carnivora	Laurasiatheria	Eutheria	GCA 028646535.1	Chromosome	2023-02-16	pl-1k	DNA Zoo
Prolemur simus	Greater bamboo lemur	1328070	Lemuridae	Strepsirrhini	Primates	Euarchontoglires	Eutheria	GCA 003258685.1	Scaffold	2018-06-20	Prosim 1.0	Henry Doorly Zoo & Aquarium
Propithecus coquereli	Coquerel's sifaka	379532	Indriidae	Strepsirrhini	Primates	Euarchontoglires	Eutheria	GCF 000956105.1	Scaffold	2015-03-23	Pcoq 1.0	Baylor College of Medicine
Proteles cristata cristata	Aardwolf	2793304	Hyaenidae	Feliformia	Carnivora	Laurasiatheria	Eutheria	GCA 017311185.1	Scaffold	2021-03-09	Proteles cristatus TS307 19 07 2019	CNRS
Psammomys obesus	Fat sand rat	48139	Muridae	Myomorpha	Rodentia	Euarchontoglires	Eutheria	GCA 907164565.1	Scaffold	2021-06-02	mPsaObe1.curated primary 1811	WELLCOME TRUST SANGER INSTITUTE
Pseudocheirus occidentalis	Western ringtail oppossum	656515	Pseudocheiridae	na	Diprotodontia	na	Metatheria	GCA 028646575.1	Chromosome	2023-02-16	Pseudocheirus occidentalis HiC	DNA Zoo
Pseudochirops corinnae	Golden ringtail possum	65629	Pseudocheiridae	na	Diprotodontia	na	Metatheria	GCA 028646515.1	Chromosome	2023-02-16	Pseudochirops corinnae HiC	DNA Zoo
Pseudochirops cupreus	Coppery ringtail possum	37702	Pseudocheiridae	na	Diprotodontia	na	Metatheria	GCA 028627135.1	Chromosome	2023-02-16	Pseudochirops cupreus HiC	DNA Zoo
Pseudois nayaur	Bharal	59542	Bovidae	Ruminantia	Artiodactyla	Laurasiatheria	Eutheria	GCA 003182575.1	Scaffold	2018-05-31	ASM318257v1	Northwest A&F University
Pteronotus parnellii mesoamericanus	Parnell's mustached bat	1884717	Mormoopidae	Microchiroptera	Chiroptera	Laurasiatheria	Eutheria	GCF 021234165.1	Scaffold	2021-12-20	CSHL Meso final	CSHL
Pteronura brasiliensis	Giant otter	9672	Mustelidae	Caniformia	Carnivora	Laurasiatheria	Eutheria	GCA 004024605.1	Scaffold	2019-01-15	PteBra v1 BIUU	Broad Institute
Pteropus alecto	Black flying fox	9402	Pteropodidae	Megachiroptera	Chiroptera	Laurasiatheria	Eutheria	GCF 000325575.1	Scaffold	2013-12-04	ASM32557v1	BGI
Pteropus giganteus	Large flying fox	132908	Pteropodidae	Megachiroptera	Chiroptera	Laurasiatheria	Eutheria	GCF 902729225.1	Scaffold	2020-04-15	Ma sr-lr union100	CIRI-Inserm-U1111
Pteropus pselaphon	Bonin flying fox	1496133	Pteropodidae	Megachiroptera	Chiroptera	Laurasiatheria	Eutheria	GCA 014363405.1	Scaffold	2020-08-23	P pselaphon scaffold 01	Environmental Genomics Office, Center for Enviromental Biology and Ecosystem Studies, National Institute for Environmental Studies
Pteropus vampyrus	Large flying fox	132908	Pteropodidae	Megachiroptera	Chiroptera	Laurasiatheria	Eutheria	GCF 000151845.1	Scaffold	2014-12-05	Pvam 2.0	Baylor College of Medicine
Puma concolor	Puma	9696	Felidae	Feliformia	Carnivora	Laurasiatheria	Eutheria	GCF 003327715.1	Scaffold	2018-07-19	PumCon1.0	Broad Institute
Puma yagouaroundi	Jaguarundi	1608482	Felidae	Feliformia	Carnivora	Laurasiatheria	Eutheria	GCF 014898765.1	Scaffold	2020-10-20	PumYag	Felidae consortium
Pusa hispida saimensis	Saimaa ringed seal	248495	Phocidae	Caniformia	Carnivora	Laurasiatheria	Eutheria	GCA 947044825.1	Contig	2023-02-03	Saimaa ringed seal draft genome	Institute of Biotechnology, University of Helsinki
Pusa sibirica	Animal	9719	Phocidae	Caniformia	Carnivora	Laurasiatheria	Eutheria	GCA 028975605.1	Chromosome	2023-03-08	PSIB hic	Institute for Molecular and Cellular biology
Pygathrix nemaeus	Red shanked douc langur	54133	Cercopithecidae	Haplorrhini	Primates	Euarchontoglires	Eutheria	GCA 004024825.1	Scaffold	2019-01-15	PygNem v1 BIUU	Broad Institute
Pygathrix nigripes	Black-shanked douc langur	310352	Cercopithecidae	Haplorrhini	Primates	Euarchontoglires	Eutheria	GCA 023764695.1	Contig	2022-06-17	ASM2376469v1	BGI-Shenzhen
Raphicerus campestris	Steenbok	59544	Bovidae	Ruminantia	Artiodactyla	Laurasiatheria	Eutheria	GCA 006410735.1	Scaffold	2019-06-24	SNB	Northwestern Polytechnical University
Rattus norvegicus	Norway rat	10116	Muridae	Myomorpha	Rodentia	Euarchontoglires	Eutheria	GCF 015227675.2	Chromosome	2020-11-10	mRatBN7.2	Wellcome Sanger Institute
Rattus rattus	Black rat	10117	Muridae	Myomorpha	Rodentia	Euarchontoglires	Eutheria	GCF 011064425.1	Chromosome	2020-03-04	Rrattus CSIRO v1	CSIRO
Redunca redunca	Bohar reedbuck	59556	Bovidae	Ruminantia	Artiodactyla	Laurasiatheria	Eutheria	GCA 006410935.1	Scaffold	2019-06-24	BHR	Northwestern Polytechnical University
Rhabdomys dilectus	Mesic four-striped grass rat	996586	Muridae	Myomorpha	Rodentia	Euarchontoglires	Eutheria	GCA 019844195.1	Scaffold	2021-09-01	ASM1984419v1	University of Pennsylvania
Rhinoceros unicornis	Greater Indian rhinoceros	9809	Rhinocerotidae	na	Perissodactyla	Laurasiatheria	Eutheria	GCA 028646465.1	Chromosome	2023-02-16	Rhinoceros unicornis HiC	DNA Zoo
Rhinolophus ferrumequinum	Greater horseshoe bat	59479	Rhinolophidae	Microchiroptera	Chiroptera	Laurasiatheria	Eutheria	GCF 004115265.2	Chromosome	2019-05-16	mRhiFer1 v1.p	Vertebrate Genomes Project
Rhinopithecus bieti	Black snub-nosed monkey	61621	Cercopithecidae	Haplorrhini	Primates	Euarchontoglires	Eutheria	GCF 001698545.2	Scaffold	2016-08-03	ASM169854v2	Laboratory for conservation and utilization of Bio-resource
Rhinopithecus roxellana	Golden snub-nosed monkey	61622	Cercopithecidae	Haplorrhini	Primates	Euarchontoglires	Eutheria	GCF 007565055.1	Chromosome	2019-07-29	ASM756505v1	Northwest University
Rhinopithecus strykeri	Burmese snub-nosed monkey	1194336	Cercopithecidae	Haplorrhini	Primates	Euarchontoglires	Eutheria	GCA 023764705.1	Contig	2022-06-17	ASM2376470v1	BGI-Shenzhen
Rhizomys pruinosus	Hoary bamboo rat	53275	Spalacidae	Myomorpha	Rodentia	Euarchontoglires	Eutheria	GCA 009823505.1	Scaffold	2019-12-31	RhiPru 1.0	Chinese Academy of Sciences
Rhombomys opimus	Great gerbil	186474	Muridae	Myomorpha	Rodentia	Euarchontoglires	Eutheria	GCA 010120015.1	Scaffold	2020-02-04	ASM1012001v1	University of Oslo
Rhynchomys soricoides	Mount Data shrew rat	1217597	Muridae	Myomorpha	Rodentia	Euarchontoglires	Eutheria	GCA 019843965.1	Scaffold	2021-09-01	ASM1984396v1	University of Pennsylvania
Rousettus aegyptiacus	Egyptian rousette	9407	Pteropodidae	Megachiroptera	Chiroptera	Laurasiatheria	Eutheria	GCF 014176215.1	Scaffold	2020-08-07	mRouAeg1.p	Bat1K
Rousettus leschenaultii	Leschenault's rousette	9408	Pteropodidae	Megachiroptera	Chiroptera	Laurasiatheria	Eutheria	GCA 015472975.1	Scaffold	2020-10-30	rouLes 1.0	Comparative Genomics Laboratory, Center for Information Biology, National Institute of Genetics
Rousettus madagascariensis	Madagascan rousette	77223	Pteropodidae	Megachiroptera	Chiroptera	Laurasiatheria	Eutheria	GCA 028533395.1	Chromosome	2023-02-09	Rousettus madagascariensis HiC	DNA Zoo
Saguinus imperator	Tamarin	9491	Cebidae	Haplorrhini	Primates	Euarchontoglires	Eutheria	GCA 004024885.1	Scaffold	2019-01-15	SagImp v1 BIUU	Broad Institute
Saguinus midas	Midas tamarin	30586	Cebidae	Haplorrhini	Primates	Euarchontoglires	Eutheria	GCA 021498475.1	Chromosome	2022-01-19	ASM2149847v1	BGI-Shenzhen
Saiga tatarica	Saiga antelope	34875	Bovidae	Ruminantia	Artiodactyla	Laurasiatheria	Eutheria	GCA 004024985.1	Scaffold	2019-01-15	SaiTat v1 BIUU	Broad Institute
Saimiri boliviensis boliviensis	Bolivian squirrel monkey	39432	Cebidae	Haplorrhini	Primates	Euarchontoglires	Eutheria	GCF 016699345.2	Scaffold	2021-01-12	BCM Sbol 2.1	Baylor College of Medicine Human Genome Sequencing Center
Sapajus apella	Tufted capuchin	9515	Cebidae	Haplorrhini	Primates	Euarchontoglires	Eutheria	GCF 009761245.1	Scaffold	2019-12-17	GSC monkey 1.0	Canada's Genomic Enterprise
Sarcophilus harrisii	Tasmanian devil	9305	Dasyuridae	na	Dasyuromorphia	na	Metatheria	GCF 902635505.1	Chromosome	2019-11-07	mSarHar1.11	SC
Scalopus aquaticus	Eastern mole	71119	Talpidae	na	Eulipotyphla	Laurasiatheria	Eutheria	GCA 004024925.1	Scaffold	2019-01-15	ScaAqu v1 BIUU	Broad Institute
Sciurus carolinensis	Gray squirrel	30640	Sciuridae	Sciuromorpha	Rodentia	Euarchontoglires	Eutheria	GCF 902686445.1	Chromosome	2020-07-31	mSciCar1.2	SC
Sciurus niger	Fox squirrel	34861	Sciuridae	Sciuromorpha	Rodentia	Euarchontoglires	Eutheria	GCA 020740815.1	Scaffold	2021-11-04	VCOM Snig 1.0	Edward Via College of Osteopathic Medicine
Sciurus vulgaris	Eurasian red squirrel	55149	Sciuridae	Sciuromorpha	Rodentia	Euarchontoglires	Eutheria	GCA 902686455.2	Chromosome	2020-07-31	mSciVul1.2	SC
Semnopithecus entellus	Hanuman langur	88029	Cercopithecidae	Haplorrhini	Primates	Euarchontoglires	Eutheria	GCA 004025065.1	Scaffold	2019-01-15	SemEnt v1 BIUU	Broad Institute
Sigmodon hispidus	Hispid cotton rat	42415	Cricetidae	Myomorpha	Rodentia	Euarchontoglires	Eutheria	GCA 004025045.1	Scaffold	2019-01-15	SigHis v1 BIUU	Broad Institute
Solenodon paradoxus	Hispaniolan solenodon	79805	Solenodontidae	na	Eulipotyphla	Laurasiatheria	Eutheria	GCA 004363575.1	Scaffold	2019-03-22	SolPar v1 BIUU	Broad Institute
Sorex araneus	European shrew	42254	Soricidae	na	Eulipotyphla	Laurasiatheria	Eutheria	GCF 000181275.2	Scaffold	2012-08-27	SorAra2.0	Broad Institute
Sorex cinereus	Cinereus shrew	36803	Soricidae	na	Eulipotyphla	Laurasiatheria	Eutheria	GCA 026122425.1	Scaffold	2022-11-10	SorCin 1.0	Trent University
Sousa chinensis	Indo-pacific humpbacked dolphin	103600	Delphinidae	Whippomorpha	Artiodactyla (Cetacea)	Laurasiatheria	Eutheria	GCA 007760645.1	Scaffold	2019-07-31	ASM776064v1	BGI-SZ
Speothos venaticus	Bush dog	68741	Canidae	Caniformia	Carnivora	Laurasiatheria	Eutheria	GCA 023170115.1	Scaffold	2022-04-01	Speothos venaticus v01	Center for Research and Education of Wildlife, Kyoto City Zoo
Spermophilus dauricus	Daurian ground squirrel	99837	Sciuridae	Sciuromorpha	Rodentia	Euarchontoglires	Eutheria	GCA 002406435.1	Scaffold	2017-09-28	ASM240643v1	BGI-shenzhen
Spilogale gracilis	Western spotted skunk	30551	Mephitidae	Caniformia	Carnivora	Laurasiatheria	Eutheria	GCA 004023965.1	Scaffold	2019-01-15	SpiGra v1 BIUU	Broad Institute
Spilogale interrupta	Plains spotted skunk	2340998	Mephitidae	Caniformia	Carnivora	Laurasiatheria	Eutheria	GCA 023159085.1	Contig	2022-04-27	UWYO SpInte 0.1	University of Wyoming
Steno bredanensis	Rough-toothed dolphin	46167	Delphinidae	Whippomorpha	Artiodactyla (Cetacea)	Laurasiatheria	Eutheria	GCA 028646385.1	Chromosome	2023-02-16	Steno bredanensis HiC	DNA Zoo
Sturnira hondurensis	Honduran Yellow-shouldered Bat	192404	Phyllostomidae	Microchiroptera	Chiroptera	Laurasiatheria	Eutheria	GCF 014824575.3	Scaffold	2020-09-30	WHU Shon v2.1	College of Life Sciences at Wuhan University
Suncus etruscus	White-toothed pygmy shrew	109475	Soricidae	na	Eulipotyphla	Laurasiatheria	Eutheria	GCF 024139225.1	Chromosome	2022-07-06	mSunEtr1.pri.cur	Vertebrate Genomes Project
Suricata suricatta	Meerkat	37032	Herpestidae	Feliformia	Carnivora	Laurasiatheria	Eutheria	GCF 006229205.1	Chromosome	2019-07-03	meerkat 22Aug2017 6uvM2 HiC	DNA Zoo
Sus cebifrons	Visayan warty pig	315377	Suidae	Suina	Artiodactyla	Laurasiatheria	Eutheria	GCA 905335845.1	Scaffold	2022-09-22	Sus cebifrons.v1	WAGENINGEN UR
Sus scrofa	Pig	9823	Suidae	Suina	Artiodactyla	Laurasiatheria	Eutheria	GCF 000003025.6	Chromosome	2017-02-07	Sscrofa11.1	The Swine Genome Sequencing Consortium (SGSC)
Sylvicapra grimmia	Bush duiker	119562	Bovidae	Ruminantia	Artiodactyla	Laurasiatheria	Eutheria	GCA 006408735.1	Scaffold	2019-06-24	CMD	Northwestern Polytechnical University
Sylvilagus bachmani	Brush rabbit	365149	Leporidae	na	Lagomorpha	Euarchontoglires	Eutheria	GCA 015711505.1	Chromosome	2020-12-04	Sylvilagus bachmani HiC	DNA Zoo
Symphalangus syndactylus	Siamang	9590	Hylobatidae	Haplorrhini	Primates	Euarchontoglires	Eutheria	GCA 028878055.1	Chromosome	2023-02-28	NHGRI mSymSyn1-v1.1-hic.freeze pri	National Human Genome Research Institute, National Institutes of Health
Syncerus caffer	African buffalo	9970	Bovidae	Ruminantia	Artiodactyla	Laurasiatheria	Eutheria	GCA 902825105.1	Scaffold	2020-04-02	synceruscaffer	UNIVERSITY OF EDINBURGH
Tachyglossus aculeatus	Australian echidna	9261	Tachyglossidae	na	Monotremata	na	Prototheria	GCF 015852505.1	Chromosome	2020-12-09	mTacAcu1.pri	Vertebrate Genomes Project
Tadarida brasiliensis	Brazilian free-tailed bat	9438	Molossidae	Microchiroptera	Chiroptera	Laurasiatheria	Eutheria	GCA 004025005.1	Scaffold	2019-01-15	TadBra v1 BIUU	Broad Institute
Talpa occidentalis	Iberian mole	50954	Talpidae	na	Eulipotyphla	Laurasiatheria	Eutheria	GCF 014898055.2	Scaffold	2020-10-19	MPIMG talOcc4v2	Max Planck Institute for Molecular Genetics
Tamandua tetradactyla	Southern tamandua	48850	Myrmecophagidae	Vermilingua	Pilosa	Xenarthra	Eutheria	GCA 023851605.1	Chromosome	2022-06-22	mTamTet1.pri	Vertebrate Genomes Project
Tamias sibiricus	Siberian chipmunk	64680	Sciuridae	Sciuromorpha	Rodentia	Euarchontoglires	Eutheria	GCA 025594165.1	Chromosome	2022-10-06	ASM2559416v1	Qufu Normal University
Tapirus indicus	Asiatic tapir	9802	Tapiridae	na	Perissodactyla	Laurasiatheria	Eutheria	GCA 004024905.1	Scaffold	2019-01-15	TapInd v1 BIUU	Broad Institute
Tapirus terrestris	Brazilian tapir	9801	Tapiridae	na	Perissodactyla	Laurasiatheria	Eutheria	GCA 004025025.1	Scaffold	2019-01-15	TapTer v1 BIUU	Broad Institute
Taxidea taxus jeffersonii	The american badger	2282171	Mustelidae	Caniformia	Carnivora	Laurasiatheria	Eutheria	GCA 003697995.1	Scaffold	2018-10-30	ASM369799v1	Canada's Genomic Enterprise
Theropithecus gelada	Gelada	9565	Cercopithecidae	Haplorrhini	Primates	Euarchontoglires	Eutheria	GCF 003255815.1	Chromosome	2018-06-19	Tgel 1.0	Kenneth Chiou's shared submissions
Thomomys bottae	Botta's pocket gopher	10013	Geomyidae	Castorimorpha	Rodentia	Euarchontoglires	Eutheria	GCA 024803745.1	Scaffold	2022-09-01	mThoBot1.0.p	UCLA
Thryonomys swinderianus	Greater cane rat	10169	Thryonomyidae	Hystricomorpha	Rodentia	Euarchontoglires	Eutheria	GCA 004025085.1	Scaffold	2019-01-15	ThrSwi v1 BIUU	Broad Institute
Thylacinus cynocephalus	Tasmanian wolf	9275	Thylacinidae	na	Dasyuromorphia	na	Metatheria	GCA 007646695.3	Chromosome	2022-04-04	UniMelb ThyCyn2.0 hybrid assembly	The University of Melbourne
Tokudaia osimensis	Amami-oshima island spiny rat	73109	Muridae	Myomorpha	Rodentia	Euarchontoglires	Eutheria	GCA 027943515.1	Scaffold	2022-11-01	T osimensis 1.0	Hokkaido University, Graduate School of Life Science
Tolypeutes matacus	Southern three-banded armadillo	183749	Chlamyphoridae	na	Cingulata	Xenarthra	Eutheria	GCA 026826555.1	Scaffold	2022-12-12	mTolMat1	University of California, Davis
Tonatia saurophila	Stripe-headed round-eared bat	171122	Phyllostomidae	Microchiroptera	Chiroptera	Laurasiatheria	Eutheria	GCA 004024845.1	Scaffold	2019-01-15	TonSau v1 BIUU	Broad Institute
Trachops cirrhosus	Fringe-lipped bat	148073	Phyllostomidae	Microchiroptera	Chiroptera	Laurasiatheria	Eutheria	GCA 028533065.1	Chromosome	2023-02-09	Trachops cirrhosus HiC	DNA Zoo
Trachypithecus francoisi	Francois's langur	54180	Cercopithecidae	Haplorrhini	Primates	Euarchontoglires	Eutheria	GCF 009764315.1	Scaffold	2019-12-18	Tfra 2.0	INSTITUTE OF ZOOLOGY, CHINESE ACADEMY OF SCIENCES
Trachypithecus phayrei crepuscula	Indochinese grey langur	272121	Cercopithecidae	Haplorrhini	Primates	Euarchontoglires	Eutheria	GCA 023762245.1	Contig	2022-06-17	ASM2376224v1	BGI-Shenzhen
Tragelaphus buxtoni	Mountain nyala	69296	Bovidae	Ruminantia	Artiodactyla	Laurasiatheria	Eutheria	GCA 006411685.1	Scaffold	2019-06-24	MTN	Northwestern Polytechnical University
Tragelaphus eurycerus	Bongo	69297	Bovidae	Ruminantia	Artiodactyla	Laurasiatheria	Eutheria	GCA 935064755.1	Contig	2022-03-28	mTraEur1.1	IBE (Institut de Biologia Evolutiva))
Tragelaphus imberbis	Lesser kudu	9947	Bovidae	Ruminantia	Artiodactyla	Laurasiatheria	Eutheria	GCA 006410775.1	Scaffold	2019-06-24	LEK	Northwestern Polytechnical University
Tragelaphus oryx	Eland	9945	Bovidae	Ruminantia	Artiodactyla	Laurasiatheria	Eutheria	GCA 006416875.1	Scaffold	2019-06-24	CME	Northwestern Polytechnical University
Tragelaphus scriptus	Bushbuck	66440	Bovidae	Ruminantia	Artiodactyla	Laurasiatheria	Eutheria	GCA 006410495.1	Scaffold	2019-06-24	BUB	Northwestern Polytechnical University
Tragelaphus spekii	Sitatunga	69298	Bovidae	Ruminantia	Artiodactyla	Laurasiatheria	Eutheria	GCA 006411015.1	Scaffold	2019-06-24	STG	Northwestern Polytechnical University
Tragelaphus strepsiceros	Greater kudu	9946	Bovidae	Ruminantia	Artiodactyla	Laurasiatheria	Eutheria	GCA 006410795.1	Scaffold	2019-06-24	GTK	Northwestern Polytechnical University
Tragulus javanicus	Java mouse-deer	9849	Tragulidae	Ruminantia	Artiodactyla	Laurasiatheria	Eutheria	GCA 004024965.2	Scaffold	2019-07-15	ASM402496v2	Broad Institute
Tragulus kanchil	Lesser mouse-deer	1088131	Tragulidae	Ruminantia	Artiodactyla	Laurasiatheria	Eutheria	GCA 022376925.1	Scaffold	2022-02-23	ASM2237692v1	Northwestern Polytechnical University
Tremarctos ornatus	Spectacled bear	9638	Ursidae	Caniformia	Carnivora	Laurasiatheria	Eutheria	GCA 028551375.1	Chromosome	2023-02-09	Tremarctos ornatus HiC	DNA Zoo
Trichechus manatus latirostris	Florida manatee	127582	Trichechidae	na	Sirenia	Afrotheria	Eutheria	GCF 000243295.1	Scaffold	2012-01-23	TriManLat1.0	Broad Institute
Trichosurus vulpecula	Common brushtail	9337	Phalangeridae	na	Diprotodontia	na	Metatheria	GCF 011100635.1	Chromosome	2020-03-10	mTriVul1.pri	Vertebrate Genomes Project
Tupaia belangeri	Northern tree shrew	37347	Tupaiidae	na	Scandentia	Euarchontoglires	Eutheria	GCA 000181375.1	Contig	2006-06-08	ASM18137v1	Broad Institute
Tupaia chinensis	Chinese tree shrew	246437	Tupaiidae	na	Scandentia	Euarchontoglires	Eutheria	GCF 000334495.1	Scaffold	2013-01-31	TupChi 1.0	BGI
Tupaia tana	Large tree shrew	70687	Tupaiidae	na	Scandentia	Euarchontoglires	Eutheria	GCA 026018925.1	Scaffold	2022-11-07	mTupTan1	University of California, Davis
Tursiops aduncus	Indo-pacific bottlenose dolphin	79784	Delphinidae	Whippomorpha	Artiodactyla (Cetacea)	Laurasiatheria	Eutheria	GCA 003227395.1	Scaffold	2018-06-14	ASM322739v1	Ewha Womans University
Tursiops truncatus	Common bottlenose dolphin	9739	Delphinidae	Whippomorpha	Artiodactyla (Cetacea)	Laurasiatheria	Eutheria	GCF 011762595.1	Chromosome	2020-03-27	mTurTru1.mat.Y	Vertebrate Genomes Project
Tympanoctomys barrerae	Plains viscacha rat	61882	Octodontidae	Hystricomorpha	Rodentia	Euarchontoglires	Eutheria	GCA 002564285.1	Scaffold	2017-10-17	Tym barrerae AO245 v1	McMaster University
Typhlomys cinereus	Soft-furred tree mouse	687455	Platacanthomyidae	Myomorpha	Rodentia	Euarchontoglires	Eutheria	GCA 023101885.1	Scaffold	2022-04-25	KIZ TCIN v1.0	Kunming Institute of Zoology
Urocitellus parryii	Arctic ground squirrel	9999	Sciuridae	Sciuromorpha	Rodentia	Euarchontoglires	Eutheria	GCF 003426925.1	Scaffold	2018-08-24	ASM342692v1	UAF
Uromys caudimaculatus	Giant uromys	36800	Muridae	Myomorpha	Rodentia	Euarchontoglires	Eutheria	GCA 028551405.1	Chromosome	2023-02-09	Uromys caudimaculatus HiC	DNA Zoo
Uropsilus gracilis	Gracile shrew mole	182669	Talpidae	na	Eulipotyphla	Laurasiatheria	Eutheria	GCA 004024945.1	Scaffold	2019-01-15	UroGra v1 BIUU	Broad Institute
Ursus americanus	American black bear	9643	Ursidae	Caniformia	Carnivora	Laurasiatheria	Eutheria	GCF 020975775.1	Contig	2021-11-24	gsc jax bbear 1.0	Jackson Laboratory
Ursus arctos	Brown bear	9644	Ursidae	Caniformia	Carnivora	Laurasiatheria	Eutheria	GCF 023065955.1	Scaffold	2022-04-20	UrsArc1.0	Washington State University
Ursus maritimus	Polar bear	29073	Ursidae	Caniformia	Carnivora	Laurasiatheria	Eutheria	GCF 017311325.1	Scaffold	2021-03-09	ASM1731132v1	University of California, Santa Cruz
Ursus thibetanus thibetanus	Asian black bear	441215	Ursidae	Caniformia	Carnivora	Laurasiatheria	Eutheria	GCA 009660055.1	Scaffold	2019-11-13	ASM966005v1	Northwestern Polytechnical University
Varecia variegata	Ruffed lemur	9455	Lemuridae	Strepsirrhini	Primates	Euarchontoglires	Eutheria	GCA 028533085.1	Chromosome	2023-02-10	Varecia variegata HiC	DNA Zoo
Vicugna pacos	Alpaca	30538	Camelidae	Tylopoda	Artiodactyla	Laurasiatheria	Eutheria	GCF 000164845.4	Scaffold	2019-07-15	VicPac3.2	Deakin University
Vicugna vicugna mensalis	Vicuña	273917	Camelidae	Tylopoda	Artiodactyla	Laurasiatheria	Eutheria	GCA 013265495.1	Scaffold	2020-06-02	ASM1326549v1	Shanxi Agricultural University
Vombatus ursinus	Common wombat	29139	Vombatidae	na	Diprotodontia	na	Metatheria	GCF 900497805.2	Scaffold	2018-12-10	bare-nosed wombat genome assembly	MRC Institute of Genetics and Molecular Medicine, University of Edinburgh
Vulpes ferrilata	Tibetan sand fox	561074	Canidae	Caniformia	Carnivora	Laurasiatheria	Eutheria	GCA 024500485.1	Chromosome	2022-08-01	ASM2450048v1	Qufu Normal University
Vulpes lagopus	Arctic fox	494514	Canidae	Caniformia	Carnivora	Laurasiatheria	Eutheria	GCF 018345385.1	Chromosome	2021-05-12	ASM1834538v1	Hebei Normal University of Science and Technology
Vulpes vulpes	Red fox	9627	Canidae	Caniformia	Carnivora	Laurasiatheria	Eutheria	GCF 003160815.1	Scaffold	2018-05-25	VulVul2.2	University of Illinois at Urbana-Champaign
Xerus inauris	South African ground squirrel	234690	Sciuridae	Sciuromorpha	Rodentia	Euarchontoglires	Eutheria	GCA 004024805.1	Scaffold	2019-01-15	XerIna v1 BIUU	Broad Institute
Xerus rutilus	Unstriped ground squirrel	226860	Sciuridae	Sciuromorpha	Rodentia	Euarchontoglires	Eutheria	GCA 028644305.1	Chromosome	2023-02-16	Xerus rutilus HiC	DNA Zoo
Zalophus californianus	California sea lion	9704	Otariidae	Caniformia	Carnivora	Laurasiatheria	Eutheria	GCF 009762305.2	Chromosome	2020-07-14	mZalCal1.pri.v2	Vertebrate Genomes Project
Zapus hudsonius	Meadow jumping mouse	160400	Dipodidae	Myomorpha	Rodentia	Euarchontoglires	Eutheria	GCA 004024765.1	Scaffold	2019-01-15	ZapHud v1 BIUU	Broad Institute
Ziphius cavirostris	Cuvier's beaked whale	9760	Ziphiidae	Whippomorpha	Artiodactyla (Cetacea)	Laurasiatheria	Eutheria	GCA 004364475.1	Scaffold	2019-03-22	ZipCav v1 BIUU	Broad Institute

## Sheet: Supplementary-Table-2
Species Name	Represented In Tree	Group	OR Total	OR Functional	OR Pseudogene	% Functional ORs	% Pseudogenised ORs
Elephas maximus indicus	No	Other	4431	2426	2005	54.75	45.25
Loxodonta africana	Yes	Other	3926	1986	1940	50.59	49.41
Dasyprocta punctata	Yes	Other	3894	1818	2076	46.69	53.31
Tachyglossus aculeatus	Yes	Other	9969	1816	8153	18.22	81.78
Sciurus niger	Yes	Other	3989	1652	2337	41.41	58.59
Choloepus hoffmanni	Yes	Other	4461	1613	2848	36.16	63.84
Dasypus novemcinctus	Yes	Other	3603	1535	2068	42.6	57.4
Tupaia tana	Yes	Other	2318	1524	794	65.75	34.25
Tolypeutes matacus	Yes	Other	9362	1494	7868	15.96	84.04
Choloepus didactylus	Yes	Other	3371	1491	1880	44.23	55.77
Sus scrofa	Yes	Other	2947	1469	1478	49.85	50.15
Apodemus sylvaticus	Yes	Other	1776	1428	348	80.41	19.59
Sciurus carolinensis	Yes	Other	3017	1401	1616	46.44	53.56
Talpa occidentalis	Yes	Other	2473	1388	1085	56.13	43.87
Notamacropus eugenii	No	Other	2052	1381	671	67.3	32.7
Ursus arctos	Yes	Other	1737	1310	427	75.42	24.58
Rattus norvegicus	Yes	Other	1665	1305	360	78.38	21.62
Cervus elaphus	Yes	Other	1944	1296	648	66.67	33.33
Tamandua tetradactyla	Yes	Other	2783	1295	1488	46.53	53.47
Trichosurus vulpecula	Yes	Other	1616	1289	327	79.76	20.24
Ursus americanus	Yes	Other	1691	1289	402	76.23	23.77
Muntiacus reevesi	Yes	Other	1961	1279	682	65.22	34.78
Hippopotamus amphibius	Yes	Other	2101	1267	834	60.3	39.7
Meles meles	Yes	Other	1922	1221	701	63.53	36.47
Microtus oregoni	Yes	Other	1473	1218	255	82.69	17.31
Rhizomys pruinosus	Yes	Other	1994	1213	781	60.83	39.17
Tokudaia osimensis	Yes	Other	1607	1208	399	75.17	24.83
Sciurus vulgaris	Yes	Other	2040	1197	843	58.68	41.32
Cynomys gunnisoni	Yes	Other	1794	1195	599	66.61	33.39
Axis porcinus	Yes	Other	2071	1194	877	57.65	42.35
Rattus rattus	Yes	Other	1476	1194	282	80.89	19.11
Marmota monax	Yes	Other	1844	1183	661	64.15	35.85
Tupaia chinensis	No	Other	2001	1177	824	58.82	41.18
Cervus canadensis	No	Other	1771	1175	596	66.35	33.65
Monodelphis domestica	Yes	Other	1386	1173	213	84.63	15.37
Fukomys damarensis	No	Other	1729	1160	569	67.09	32.91
Myrmecophaga tridactyla	Yes	Other	6402	1160	5242	18.12	81.88
Vombatus ursinus	Yes	Other	1832	1154	678	62.99	37.01
Muntiacus gongshanensis	No	Other	1836	1151	685	62.69	37.31
Dasyurus viverrinus	Yes	Other	1390	1148	242	82.59	17.41
Bos indicus x Bos taurus	No	Other	2030	1143	887	56.31	43.69
Phacochoerus africanus	Yes	Other	2038	1141	897	55.99	44.01
Bos gaurus x Bos taurus	No	Other	2025	1140	885	56.3	43.7
Mus caroli	Yes	Other	1371	1140	231	83.15	16.85
Scalopus aquaticus	Yes	Other	1884	1139	745	60.46	39.54
Muntiacus crinifrons	Yes	Other	1831	1138	693	62.15	37.85
Bubalus bubalis	No	Other	1914	1132	782	59.14	40.86
Cervus albirostris	No	Other	2242	1132	1110	50.49	49.51
Mus musculus	Yes	Other	1299	1124	175	86.53	13.47
Arvicanthis niloticus	Yes	Other	1343	1121	222	83.47	16.53
Bos taurus x Bison bison	No	Other	1974	1121	853	56.79	43.21
Equus caballus	No	Other	2404	1120	1284	46.59	53.41
Rhinoceros unicornis	Yes	Other	2354	1117	1237	47.45	52.55
Spermophilus dauricus	Yes	Other	2038	1117	921	54.81	45.19
Mus spretus	Yes	Other	1288	1116	172	86.65	13.35
Ursus maritimus	Yes	Other	1527	1116	411	73.08	26.92
Tragelaphus eurycerus	Yes	Other	2093	1113	980	53.18	46.82
Microtus agrestis	Yes	Other	1335	1112	223	83.3	16.7
Nannospalax galili	No	Other	2010	1110	900	55.22	44.78
Thomomys bottae	Yes	Other	1701	1109	592	65.2	34.8
Manis pentadactyla	Yes	Other	2338	1102	1236	47.13	52.87
Hexaprotodon liberiensis	No	Other	1699	1097	602	64.57	35.43
Bos taurus	No	Other	1943	1092	851	56.2	43.8
Moschus berezovskii	Yes	Other	1794	1092	702	60.87	39.13
Tragulus javanicus	Yes	Other	1782	1082	700	60.72	39.28
Antechinus stuartii	Yes	Other	1336	1078	258	80.69	19.31
Mus pahari	Yes	Other	1299	1077	222	82.91	17.09
Martes flavigula	Yes	Other	1404	1075	329	76.57	23.43
Bos grunniens x Bos taurus	No	Other	1911	1074	837	56.2	43.8
Sorex araneus	Yes	Other	1443	1072	371	74.29	25.71
Bos gaurus	Yes	Other	2120	1065	1055	50.24	49.76
Equus quagga	Yes	Other	2175	1065	1110	48.97	51.03
Elaphurus davidianus	Yes	Other	1836	1059	777	57.68	42.32
Antechinus flavipes	Yes	Other	1217	1057	160	86.85	13.15
Chrysochloris asiatica	Yes	Other	1483	1053	430	71	29
Sigmodon hispidus	Yes	Other	1360	1050	310	77.21	22.79
Phalanger gymnotis	Yes	Other	1925	1046	879	54.34	45.66
Marmota marmota marmota	No	Other	1609	1040	569	64.64	35.36
Ursus thibetanus thibetanus	No	Other	1609	1040	569	64.64	35.36
Tragelaphus imberbis	Yes	Other	2257	1039	1218	46.03	53.97
Peromyscus leucopus	Yes	Other	1366	1036	330	75.84	24.16
Microtus californicus	Yes	Other	1253	1034	219	82.52	17.48
Sarcophilus harrisii	Yes	Other	1300	1033	267	79.46	20.54
Cynocephalus volans	Yes	Other	1580	1032	548	65.32	34.68
Tragulus kanchil	Yes	Other	1704	1031	673	60.5	39.5
Cervus hanglu yarkandensis	No	Other	1727	1025	702	59.35	40.65
Orycteropus afer afer	No	Other	1642	1024	618	62.36	37.64
Peromyscus californicus insignis	No	Other	1173	1024	149	87.3	12.7
Grammomys surdaster	No	Other	1254	1023	231	81.58	18.42
Rhabdomys dilectus	No	Other	1232	1020	212	82.79	17.21
Mus minutoides	Yes	Other	1232	1019	213	82.71	17.29
Nesogale talazaci	No	Other	1603	1019	584	63.57	36.43
Tragelaphus scriptus	Yes	Other	2140	1018	1122	47.57	52.43
Tapirus indicus	Yes	Other	2307	1017	1290	44.08	55.92
Ceratotherium simum simum	No	Other	1788	1013	775	56.66	43.34
Equus asinus	No	Other	2261	1010	1251	44.67	55.33
Tragelaphus strepsiceros	Yes	Other	2145	1006	1139	46.9	53.1
Dipodomys merriami	Yes	Other	1226	1004	222	81.89	18.11
Macropus giganteus	Yes	Other	2063	1004	1059	48.67	51.33
Helogale parvula	Yes	Other	1579	994	585	62.95	37.05
Myodes glareolus	Yes	Other	1240	994	246	80.16	19.84
Mesocricetus auratus	Yes	Other	1293	992	301	76.72	23.28
Peromyscus eremicus	Yes	Other	1241	992	249	79.94	20.06
Uromys caudimaculatus	Yes	Other	2256	986	1270	43.71	56.29
Mus spicilegus	Yes	Other	1225	983	242	80.24	19.76
Mungos mungo	Yes	Other	1791	981	810	54.77	45.23
Cephalophus harveyi	Yes	Other	1825	979	846	53.64	46.36
Cricetulus griseus	No	Other	1261	977	284	77.48	22.52
Microtus arvalis	Yes	Other	1541	977	564	63.4	36.6
Typhlomys cinereus	Yes	Other	1436	975	461	67.9	32.1
Odocoileus hemionus	Yes	Other	1773	974	799	54.94	45.06
Erinaceus europaeus	Yes	Other	1151	971	180	84.36	15.64
Arvicola amphibius	Yes	Other	1195	970	225	81.17	18.83
Peromyscus maniculatus bairdii	No	Other	1182	970	212	82.06	17.94
Gracilinanus agilis	Yes	Other	1161	966	195	83.2	16.8
Mustela putorius furo	Yes	Other	1359	960	399	70.64	29.36
Uropsilus gracilis	Yes	Other	1397	960	437	68.72	31.28
Ovis orientalis	Yes	Other	1539	959	580	62.31	37.69
Macropus fuliginosus	Yes	Other	2063	958	1105	46.44	53.56
Sus cebifrons	Yes	Other	1968	957	1011	48.63	51.37
Tapirus terrestris	Yes	Other	2693	953	1740	35.39	64.61
Peromyscus polionotus subgriseus	No	Other	1174	952	222	81.09	18.91
Onychomys torridus	Yes	Other	1187	951	236	80.12	19.88
Spilogale interrupta	No	Other	1355	951	404	70.18	29.82
Dicerorhinus sumatrensis harrissoni	No	Other	1914	948	966	49.53	50.47
Neodon shergylaensis	No	Other	1213	948	265	78.15	21.85
Ictidomys tridecemlineatus	No	Other	1517	945	572	62.29	37.71
Marmota flaviventris	Yes	Other	1596	943	653	59.09	40.91
Solenodon paradoxus	No	Other	2000	943	1057	47.15	52.85
Alexandromys oeconomus	No	Other	1305	942	363	72.18	27.82
Damaliscus lunatus	Yes	Other	1662	940	722	56.56	43.44
Bos frontalis	No	Other	1796	938	858	52.23	47.77
Microtus fortis	Yes	Other	1191	935	256	78.51	21.49
Marmota himalayana	Yes	Other	1526	934	592	61.21	38.79
Bubalus depressicornis	Yes	Other	1777	933	844	52.5	47.5
Lagorchestes hirsutus	Yes	Other	1544	933	611	60.43	39.57
Martes zibellina	Yes	Other	1245	932	313	74.86	25.14
Tamias sibiricus	Yes	Other	1630	932	698	57.18	42.82
Budorcas taxicolor	Yes	Other	1458	929	529	63.72	36.28
Glaucomys volans	Yes	Other	2001	929	1072	46.43	53.57
Paradoxurus hermaphroditus	Yes	Other	1616	927	689	57.36	42.64
Mustela erminea	Yes	Other	1305	926	379	70.96	29.04
Syncerus caffer	Yes	Other	1763	924	839	52.41	47.59
Heterohyrax brucei	Yes	Other	1294	921	373	71.17	28.83
Neogale vison	Yes	Other	1222	921	301	75.37	24.63
Odocoileus virginianus texanus	Yes	Other	1545	921	624	59.61	40.39
Panthera pardus	Yes	Other	1134	920	214	81.13	18.87
Capra hircus	No	Other	1537	919	618	59.79	40.21
Ovis ammon polii x Ovis aries	No	Other	1441	918	523	63.71	36.29
Praomys delectorum	Yes	Other	1252	917	335	73.24	26.76
Bos indicus	No	Other	1453	915	538	62.97	37.03
Bos mutus	Yes	Other	1908	912	996	47.8	52.2
Kobus leche leche	No	Other	1545	912	633	59.03	40.97
Kobus ellipsiprymnus	Yes	Other	1566	908	658	57.98	42.02
Capra sibirica	Yes	Other	1542	907	635	58.82	41.18
Panthera tigris	Yes	Other	1106	907	199	82.01	17.99
Microtus ochrogaster	Yes	Other	1108	903	205	81.5	18.5
Suncus etruscus	Yes	Other	1067	900	167	84.35	15.65
Elephantulus edwardii	Yes	Other	1028	899	129	87.45	12.55
Echinops telfairi	Yes	Other	1176	895	281	76.11	23.89
Peromyscus nudipes	No	Other	1145	891	254	77.82	22.18
Ovis aries	No	Other	1443	890	553	61.68	38.32
Capreolus pygargus	Yes	Other	1728	889	839	51.45	48.55
Chaetophractus vellerosus	Yes	Other	13494	889	12605	6.59	93.41
Cricetomys gambianus	Yes	Other	1885	888	997	47.11	52.89
Gymnobelideus leadbeateri	Yes	Other	1081	886	195	81.96	18.04
Peromyscus attwateri	Yes	Other	1098	885	213	80.6	19.4
Mastomys coucha	Yes	Other	1095	884	211	80.73	19.27
Dinomys branickii	Yes	Other	1543	883	660	57.23	42.77
Dromiciops gliroides	Yes	Other	1037	883	154	85.15	14.85
Tremarctos ornatus	Yes	Other	1874	880	994	46.96	53.04
Prionailurus viverrinus	Yes	Other	1095	879	216	80.27	19.73
Dipodomys spectabilis	Yes	Other	1125	875	250	77.78	22.22
Bison bison bison	No	Other	1938	874	1064	45.1	54.9
Peromyscus aztecus	Yes	Other	1145	874	271	76.33	23.67
Hydropotes inermis	Yes	Other	1584	873	711	55.11	44.89
Equus przewalskii	No	Other	2055	871	1184	42.38	57.62
Leopardus geoffroyi	Yes	Other	1085	868	217	80	20
Marmota vancouverensis	Yes	Other	1421	867	554	61.01	38.99
Prionailurus bengalensis	Yes	Other	1088	865	223	79.5	20.5
Heterocephalus glaber	Yes	Other	2242	863	1379	38.49	61.51
Erethizon dorsatum	Yes	Other	1206	862	344	71.48	28.52
Felis chaus	Yes	Other	1060	862	198	81.32	18.68
Panthera leo	Yes	Other	1072	862	210	80.41	19.59
Hippotragus niger niger	No	Other	1403	861	542	61.37	38.63
Peromyscus melanophrys	Yes	Other	1093	860	233	78.68	21.32
Manis javanica	Yes	Other	1610	858	752	53.29	46.71
Neofelis nebulosa	Yes	Other	1072	856	216	79.85	20.15
Proteles cristata cristata	No	Other	1078	856	222	79.41	20.59
Ammotragus lervia	Yes	Other	1446	851	595	58.85	41.15
Oryctolagus cuniculus	Yes	Other	1136	851	285	74.91	25.09
Lynx rufus	Yes	Other	1042	848	194	81.38	18.62
Nyctereutes procyonoides	Yes	Other	1080	848	232	78.52	21.48
Oreotragus oreotragus	Yes	Other	1483	847	636	57.11	42.89
Ovibos moschatus	Yes	Other	1400	846	554	60.43	39.57
Moschus moschiferus	Yes	Other	1754	844	910	48.12	51.88
Litocranius walleri	Yes	Other	1495	843	652	56.39	43.61
Mirza zaza	Yes	Other	1137	840	297	73.88	26.12
Capra aegagrus	Yes	Other	1531	839	692	54.8	45.2
Felis catus	No	Other	1041	839	202	80.6	19.4
Acomys dimidiatus	Yes	Other	1013	838	175	82.72	17.28
Eira barbara	Yes	Other	1273	836	437	65.67	34.33
Dipodomys ordii	Yes	Other	1093	835	258	76.4	23.6
Cavia tschudii	Yes	Other	2018	832	1186	41.23	58.77
Microcebus mittermeieri	Yes	Other	1251	830	421	66.35	33.65
Acomys cahirinus	Yes	Other	1077	829	248	76.97	23.03
Alces alces	Yes	Other	1540	829	711	53.83	46.17
Rhynchomys soricoides	No	Other	1209	829	380	68.57	31.43
Hippotragus equinus	Yes	Other	1357	828	529	61.02	38.98
Microcebus sp. 3 GT-2019	No	Other	1104	826	278	74.82	25.18
Perognathus longimembris pacificus	No	Other	1101	825	276	74.93	25.07
Pseudochirops cupreus	Yes	Other	1275	824	451	64.63	35.37
Cavia porcellus	No	Other	1830	821	1009	44.86	55.14
Oryx dammah	Yes	Other	1457	818	639	56.14	43.86
Acomys russatus	Yes	Other	1023	817	206	79.86	20.14
Eudorcas thomsonii	Yes	Other	1470	817	653	55.58	44.42
Ailurus styani	No	Other	1043	813	230	77.95	22.05
Lynx canadensis	Yes	Other	1042	811	231	77.83	22.17
Tragelaphus spekii	Yes	Other	2035	811	1224	39.85	60.15
Lophiomys imhausi	Yes	Other	1138	810	328	71.18	28.82
Microcebus tavaratra	Yes	Other	1128	810	318	71.81	28.19
Redunca redunca	Yes	Other	1383	810	573	58.57	41.43
Glis glis	Yes	Other	1170	808	362	69.06	30.94
Mustela nigripes	Yes	Other	1260	808	452	64.13	35.87
Microcebus griseorufus	Yes	Other	1213	805	408	66.36	33.64
Connochaetes taurinus	Yes	Other	1338	804	534	60.09	39.91
Capromys pilorides	Yes	Other	2529	800	1729	31.63	68.37
Oryx gazella	Yes	Other	1501	797	704	53.1	46.9
Pseudochirops corinnae	Yes	Other	1300	797	503	61.31	38.69
Pseudocheirus occidentalis	Yes	Other	1227	793	434	64.63	35.37
Sorex cinereus	Yes	Other	954	793	161	83.12	16.88
Myrmecobius fasciatus	Yes	Other	1128	792	336	70.21	29.79
Vulpes ferrilata	No	Other	1030	791	239	76.8	23.2
Crocuta crocuta	Yes	Other	1084	790	294	72.88	27.12
Sylvicapra grimmia	Yes	Other	1578	788	790	49.94	50.06
Microcebus murinus	Yes	Other	1009	786	223	77.9	22.1
Mustela nivalis	Yes	Other	1241	786	455	63.34	36.66
Spilogale gracilis	Yes	Other	1617	786	831	48.61	51.39
Dipodomys stephensi	Yes	Other	1173	785	388	66.92	33.08
Hyaena hyaena	Yes	Other	1044	785	259	75.19	24.81
Phodopus roborovskii	Yes	Other	999	781	218	78.18	21.82
Taxidea taxus jeffersonii	No	Other	1218	781	437	64.12	35.88
Helarctos malayanus	Yes	Other	1920	778	1142	40.52	59.48
Canis lupus dingo	No	Other	1022	775	247	75.83	24.17
Lutra lutra	Yes	Other	1186	775	411	65.35	34.65
Nycticebus coucang	Yes	Other	966	775	191	80.23	19.77
Ochotona curzoniae	Yes	Other	928	775	153	83.51	16.49
Acinonyx jubatus	Yes	Other	1017	774	243	76.11	23.89
Antidorcas marsupialis	Yes	Other	1418	770	648	54.3	45.7
Urocitellus parryii	No	Other	1163	770	393	66.21	33.79
Graphiurus murinus	Yes	Other	1456	769	687	52.82	47.18
Acomys kempi	Yes	Other	885	768	117	86.78	13.22
Microcebus ravelobensis	Yes	Other	1062	767	295	72.22	27.78
Otocyon megalotis megalotis	No	Other	956	762	194	79.71	20.29
Procavia capensis	Yes	Other	1446	762	684	52.7	47.3
Hemitragus hylocrius	No	Other	1481	761	720	51.38	48.62
Lynx pardinus	Yes	Other	1044	761	283	72.89	27.11
Hystrix brachyura	Yes	Other	1253	760	493	60.65	39.35
Ovis canadensis	Yes	Other	1557	759	798	48.75	51.25
Crocidura indochinensis	Yes	Other	1565	756	809	48.31	51.69
Acomys percivali	Yes	Other	959	753	206	78.52	21.48
Neofelis diardi	Yes	Other	1047	751	296	71.73	28.27
Ondatra zibethicus	Yes	Other	1200	750	450	62.5	37.5
Otolemur garnettii	Yes	Other	921	750	171	81.43	18.57
Pseudois nayaur	Yes	Other	1557	750	807	48.17	51.83
Vulpes vulpes	Yes	Other	1015	747	268	73.6	26.4
Hystrix cristata	Yes	Other	1430	744	686	52.03	47.97
Beatragus hunteri	Yes	Other	1336	743	593	55.61	44.39
Nanger granti	Yes	Other	1398	741	657	53	47
Addax nasomaculatus	Yes	Other	1403	739	664	52.67	47.33
Ailuropoda melanoleuca	Yes	Other	1523	738	785	48.46	51.54
Hydrochoerus hydrochaeris	Yes	Other	2547	738	1809	28.98	71.02
Otocolobus manul	Yes	Other	988	737	251	74.6	25.4
Catagonus wagneri	Yes	Other	1862	736	1126	39.53	60.47
Xerus inauris	Yes	Other	1365	730	635	53.48	46.52
Mirza coquereli	Yes	Other	1057	726	331	68.68	31.32
Antilocapra americana	Yes	Other	1256	725	531	57.72	42.28
Apodemus speciosus	Yes	Other	1335	724	611	54.23	45.77
Castor canadensis	Yes	Other	2246	722	1524	32.15	67.85
Muscardinus avellanarius	Yes	Other	918	722	196	78.65	21.35
Aplodontia rufa	Yes	Other	1204	720	484	59.8	40.2
Mellivora capensis	Yes	Other	1670	717	953	42.93	57.07
Octodon degus	Yes	Other	942	712	230	75.58	24.42
Suricata suricatta	Yes	Other	1365	712	653	52.16	47.84
Vulpes lagopus	No	Other	917	707	210	77.1	22.9
Chinchilla lanigera	Yes	Other	935	705	230	75.4	24.6
Bos grunniens	No	Other	1562	704	858	45.07	54.93
Lontra canadensis	Yes	Other	1152	700	452	60.76	39.24
Desmodus rotundus	Yes	Chiroptera	873	697	176	79.84	20.16
Zapus hudsonius	Yes	Other	1412	695	717	49.22	50.78
Galago moholi	Yes	Other	925	694	231	75.03	24.97
Xerus rutilus	Yes	Other	1304	691	613	52.99	47.01
Neotragus pygmaeus	Yes	Other	1588	690	898	43.45	56.55
Panthera uncia	Yes	Other	933	689	244	73.85	26.15
Cuniculus paca	Yes	Other	2616	688	1928	26.3	73.7
Canis lupus familiaris	No	Other	910	687	223	75.49	24.51
Puma yagouaroundi	Yes	Other	992	687	305	69.25	30.75
Lemur catta	Yes	Other	855	681	174	79.65	20.35
Rousettus leschenaultii	Yes	Chiroptera	1026	680	346	66.28	33.72
Pteropus giganteus	Yes	Chiroptera	1051	679	372	64.61	35.39
Grammomys dolichurus	Yes	Other	1198	673	525	56.18	43.82
Raphicerus campestris	Yes	Other	1296	670	626	51.7	48.3
Phyllostomus discolor	Yes	Chiroptera	887	669	218	75.42	24.58
Eulemur mongoz	Yes	Other	1064	668	396	62.78	37.22
Pedetes capensis	Yes	Other	1057	666	391	63.01	36.99
Okapia johnstoni	Yes	Other	1042	665	377	63.82	36.18
Caracal caracal	Yes	Other	896	660	236	73.66	26.34
Daubentonia madagascariensis	Yes	Other	1011	656	355	64.89	35.11
Condylura cristata	Yes	Other	808	655	153	81.06	18.94
Thylacinus cynocephalus	Yes	Other	1168	653	515	55.91	44.09
Eulemur fulvus	Yes	Other	1358	652	706	48.01	51.99
Phodopus sungorus	Yes	Other	899	650	249	72.3	27.7
Prionailurus iriomotensis	No	Other	989	649	340	65.62	34.38
Hylomyscus alleni	Yes	Other	1166	648	518	55.57	44.43
Loris tardigradus	Yes	Other	864	647	217	74.88	25.12
Cryptoprocta ferox	Yes	Other	1150	643	507	55.91	44.09
Galeopterus variegatus	Yes	Other	1516	643	873	42.41	57.59
Phascolarctos cinereus	Yes	Other	1120	639	481	57.05	42.95
Lama guanicoe cacsilensis	Yes	Other	1043	638	405	61.17	38.83
Chrysocyon brachyurus	Yes	Other	1082	636	446	58.78	41.22
Coendou prehensilis	Yes	Other	1443	628	815	43.52	56.48
Nycticebus bengalensis	Yes	Other	865	627	238	72.49	27.51
Potos flavus	Yes	Other	1218	624	594	51.23	48.77
Sylvilagus bachmani	No	Other	939	624	315	66.45	33.55
Vicugna vicugna mensalis	No	Other	979	623	356	63.64	36.36
Microtus richardsoni	Yes	Other	802	622	180	77.56	22.44
Myocastor coypus	Yes	Other	1005	622	383	61.89	38.11
Eulemur macaco	Yes	Other	844	620	224	73.46	26.54
Ovis nivicola lydekkeri	No	Other	1379	620	759	44.96	55.04
Felis nigripes	Yes	Other	1072	619	453	57.74	42.26
Neotoma lepida	Yes	Other	971	616	355	63.44	36.56
Puma concolor	Yes	Other	916	614	302	67.03	32.97
Ctenomys sociabilis	Yes	Other	1001	612	389	61.14	38.86
Propithecus coquereli	Yes	Other	831	612	219	73.65	26.35
Speothos venaticus	Yes	Other	975	610	365	62.56	37.44
Giraffa tippelskirchi	No	Other	1030	608	422	59.03	40.97
Galemys pyrenaicus	Yes	Other	829	607	222	73.22	26.78
Oreamnos americanus	Yes	Other	1237	607	630	49.07	50.93
Panthera onca	Yes	Other	1140	607	533	53.25	46.75
Cheirogaleus medius	Yes	Other	846	604	242	71.39	28.61
Rhombomys opimus	Yes	Other	879	604	275	68.71	31.29
Eulemur flavifrons	No	Other	827	602	225	72.79	27.21
Pteronura brasiliensis	Yes	Other	1194	601	593	50.34	49.66
Camelus dromedarius	Yes	Other	1180	595	585	50.42	49.58
Phataginus tricuspis	Yes	Other	2628	595	2033	22.64	77.36
Enhydra lutris kenyoni	No	Other	1072	591	481	55.13	44.87
Camelus bactrianus	No	Other	914	590	324	64.55	35.45
Procyon lotor	Yes	Other	1249	590	659	47.24	52.76
Camelus ferus	Yes	Other	943	589	354	62.46	37.54
Dicrostonyx torquatus	Yes	Other	856	589	267	68.81	31.19
Artibeus jamaicensis	Yes	Chiroptera	813	587	226	72.2	27.8
Psammomys obesus	Yes	Other	846	586	260	69.27	30.73
Neotragus moschatus	No	Other	1410	584	826	41.42	58.58
Meriones unguiculatus	Yes	Other	940	579	361	61.6	38.4
Lycaon pictus	Yes	Other	785	578	207	73.63	26.37
Jaculus jaculus	Yes	Other	759	575	184	75.76	24.24
Prolemur simus	Yes	Other	827	575	252	69.53	30.47
Petromus typicus	Yes	Other	996	562	434	56.43	43.57
Sturnira hondurensis	No	Chiroptera	966	552	414	57.14	42.86
Varecia variegata	Yes	Other	1012	551	461	54.45	45.55
Mastomys natalensis	Yes	Other	1247	541	706	43.38	56.62
Madoqua kirkii	Yes	Other	1414	536	878	37.91	62.09
Microtus montanus	Yes	Other	997	536	461	53.76	46.24
Myotis yumanensis	Yes	Chiroptera	618	529	89	85.6	14.4
Myotis lucifugus	Yes	Chiroptera	677	528	149	77.99	22.01
Phyllostomus hastatus	Yes	Chiroptera	742	527	215	71.02	28.98
Ochotona princeps	Yes	Other	730	525	205	71.92	28.08
Dolichotis patagonum	Yes	Other	1796	523	1273	29.12	70.88
Lepus timidus	Yes	Other	715	522	193	73.01	26.99
Orientallactaga bullata	No	Other	870	516	354	59.31	40.69
Micronycteris hirsuta	Yes	Chiroptera	1108	507	601	45.76	54.24
Pteropus pselaphon	No	Chiroptera	891	507	384	56.9	43.1
Ellobius lutescens	No	Other	1016	505	511	49.7	50.3
Vicugna pacos	No	Other	1003	502	501	50.05	49.95
Procapra przewalskii	Yes	Other	955	499	456	52.25	47.75
Indri indri	Yes	Other	974	496	478	50.92	49.08
Lepus americanus	Yes	Other	1141	494	647	43.3	56.7
Thryonomys swinderianus	Yes	Other	965	489	476	50.67	49.33
Tupaia belangeri	Yes	Other	1724	487	1237	28.25	71.75
Pipistrellus pipistrellus	Yes	Chiroptera	574	484	90	84.32	15.68
Trichechus manatus latirostris	No	Sirenia	1115	476	639	42.69	57.31
Murina aurata feae	No	Chiroptera	906	468	438	51.66	48.34
Pteropus vampyrus	Yes	Chiroptera	927	466	461	50.27	49.73
Antrozous pallidus	Yes	Chiroptera	539	462	77	85.71	14.29
Lasiurus borealis	Yes	Chiroptera	820	460	360	56.1	43.9
Myotis myotis	Yes	Chiroptera	533	457	76	85.74	14.26
Moschus chrysogaster	Yes	Other	1316	456	860	34.65	65.35
Myotis brandtii	Yes	Chiroptera	611	455	156	74.47	25.53
Tonatia saurophila	Yes	Chiroptera	1077	454	623	42.15	57.85
Philantomba maxwellii	Yes	Other	908	445	463	49.01	50.99
Pipistrellus kuhlii	Yes	Chiroptera	511	439	72	85.91	14.09
Eidolon dupreanum	Yes	Chiroptera	1052	438	614	41.63	58.37
Rousettus aegyptiacus	Yes	Chiroptera	620	438	182	70.65	29.35
Rousettus madagascariensis	Yes	Chiroptera	1160	438	722	37.76	62.24
Ia io	Yes	Chiroptera	579	437	142	75.47	24.53
Manis crassicaudata	Yes	Other	1484	432	1052	29.11	70.89
Nanger dama	Yes	Other	1425	432	993	30.32	69.68
Carlito syrichta	No	Haplorrhini	883	419	464	47.45	52.55
Halichoerus grypus	Yes	Pinnipedia	702	418	284	59.54	40.46
Saiga tatarica	Yes	Other	1384	418	966	30.2	69.8
Pusa hispida saimensis	No	Pinnipedia	698	415	283	59.46	40.54
Homo sapiens	Yes	Haplorrhini	818	413	405	50.49	49.51
Pteronotus parnellii mesoamericanus	No	Chiroptera	546	410	136	75.09	24.91
Odobenus rosmarus divergens	No	Pinnipedia	842	408	434	48.46	51.54
Cebus imitator	No	Haplorrhini	580	407	173	70.17	29.83
Eptesicus fuscus	Yes	Chiroptera	516	407	109	78.88	21.12
Pteropus alecto	Yes	Chiroptera	749	407	342	54.34	45.66
Sapajus apella	Yes	Haplorrhini	570	406	164	71.23	28.77
Aotus nancymaae	Yes	Haplorrhini	555	404	151	72.79	27.21
Pan paniscus	Yes	Haplorrhini	752	402	350	53.46	46.54
Pan troglodytes	Yes	Haplorrhini	746	402	344	53.89	46.11
Cephalopachus bancanus	No	Haplorrhini	776	401	375	51.68	48.32
Molossus molossus	Yes	Chiroptera	528	400	128	75.76	24.24
Capreolus capreolus	Yes	Other	1383	399	984	28.85	71.15
Zalophus californianus	Yes	Pinnipedia	790	398	392	50.38	49.62
Gorilla gorilla gorilla	Yes	Haplorrhini	738	395	343	53.52	46.48
Rhinolophus ferrumequinum	Yes	Chiroptera	559	393	166	70.3	29.7
Cynopterus brachyotis	Yes	Chiroptera	688	389	299	56.54	43.46
Macroglossus sobrinus	Yes	Chiroptera	815	387	428	47.48	52.52
Macaca cyclopis	Yes	Haplorrhini	614	383	231	62.38	37.62
Macaca fuscata fuscata	No	Haplorrhini	713	383	330	53.72	46.28
Macaca mulatta	Yes	Haplorrhini	626	382	244	61.02	38.98
Papio anubis	Yes	Haplorrhini	638	380	258	59.56	40.44
Callithrix jacchus	Yes	Other	568	379	189	66.73	33.27
Ellobius talpinus	No	Other	998	376	622	37.68	62.32
Callorhinus ursinus	Yes	Pinnipedia	863	374	489	43.34	56.66
Cercocebus atys	Yes	Haplorrhini	605	374	231	61.82	38.18
Macaca fascicularis	Yes	Haplorrhini	618	374	244	60.52	39.48
Octomys mimax	Yes	Other	930	374	556	40.22	59.78
Mandrillus leucophaeus	Yes	Haplorrhini	615	373	242	60.65	39.35
Macaca nemestrina	Yes	Haplorrhini	634	371	263	58.52	41.48
Nycticeius humeralis	Yes	Chiroptera	699	371	328	53.08	46.92
Theropithecus gelada	Yes	Haplorrhini	614	371	243	60.42	39.58
Anoura caudifer	Yes	Chiroptera	765	369	396	48.24	51.76
Noctilio leporinus	Yes	Chiroptera	519	369	150	71.1	28.9
Cebus albifrons	Yes	Haplorrhini	635	368	267	57.95	42.05
Macaca silenus	Yes	Haplorrhini	601	361	240	60.07	39.93
Carollia perspicillata	Yes	Chiroptera	1834	359	1475	19.57	80.43
Dugong dugon	Yes	Sirenia	1069	357	712	33.4	66.6
Eumetopias jubatus	Yes	Pinnipedia	739	356	383	48.17	51.83
Saguinus imperator	Yes	Haplorrhini	599	354	245	59.1	40.9
Leontopithecus rosalia	Yes	Haplorrhini	560	352	208	62.86	37.14
Macaca arctoides	Yes	Haplorrhini	590	351	239	59.49	40.51
Macaca thibetana thibetana	No	Haplorrhini	604	350	254	57.95	42.05
Miniopterus natalensis	Yes	Chiroptera	441	347	94	78.68	21.32
Ctenodactylus gundi	Yes	Other	541	344	197	63.59	36.41
Phoca vitulina	Yes	Pinnipedia	654	344	310	52.6	47.4
Capra ibex	Yes	Other	603	342	261	56.72	43.28
Lophocebus aterrimus	Yes	Haplorrhini	595	337	258	56.64	43.36
Pongo pygmaeus	Yes	Haplorrhini	684	337	347	49.27	50.73
Macaca nigra	Yes	Haplorrhini	618	335	283	54.21	45.79
Ornithorhynchus anatinus	Yes	Other	474	334	140	70.46	29.54
Pusa sibirica	Yes	Pinnipedia	652	332	320	50.92	49.08
Chlorocebus sabaeus	Yes	Haplorrhini	611	331	280	54.17	45.83
Hipposideros pendleburyi	No	Chiroptera	531	330	201	62.15	37.85
Myotis davidii	Yes	Chiroptera	581	328	253	56.45	43.55
Tadarida brasiliensis	Yes	Chiroptera	903	327	576	36.21	63.79
Aeorestes cinereus	No	Chiroptera	493	325	168	65.92	34.08
Ateles geoffroyi	Yes	Haplorrhini	508	325	183	63.98	36.02
Papio papio	Yes	Haplorrhini	618	325	293	52.59	47.41
Erythrocebus patas	Yes	Haplorrhini	640	324	316	50.62	49.38
Cavia aperea	Yes	Other	1079	323	756	29.94	70.06
Arctocephalus townsendi	Yes	Pinnipedia	800	322	478	40.25	59.75
Trachops cirrhosus	Yes	Chiroptera	642	321	321	50	50
Tympanoctomys barrerae	Yes	Other	844	321	523	38.03	61.97
Eidolon helvum	Yes	Chiroptera	632	317	315	50.16	49.84
Neomonachus schauinslandi	No	Pinnipedia	779	317	462	40.69	59.31
Alouatta palliata	Yes	Haplorrhini	538	314	224	58.36	41.64
Pithecia pithecia	Yes	Haplorrhini	572	314	258	54.9	45.1
Miopithecus talapoin	Yes	Haplorrhini	581	304	277	52.32	47.68
Miniopterus schreibersii	Yes	Chiroptera	468	303	165	64.74	35.26
Papio hamadryas	Yes	Haplorrhini	568	302	266	53.17	46.83
Pongo abelii	Yes	Haplorrhini	659	301	358	45.68	54.32
Mandrillus sphinx	Yes	Haplorrhini	621	299	322	48.15	51.85
Cercopithecus mona	Yes	Haplorrhini	527	295	232	55.98	44.02
Chlorocebus aethiops	Yes	Haplorrhini	531	292	239	54.99	45.01
Macrotus californicus	Yes	Chiroptera	550	292	258	53.09	46.91
Hipposideros armiger	Yes	Chiroptera	472	291	181	61.65	38.35
Mirounga leonina	Yes	Pinnipedia	576	289	287	50.17	49.83
Saimiri boliviensis boliviensis	No	Haplorrhini	427	284	143	66.51	33.49
Leptonychotes weddellii	Yes	Pinnipedia	615	283	332	46.02	53.98
Saguinus midas	Yes	Haplorrhini	450	281	169	62.44	37.56
Cercopithecus mitis	Yes	Haplorrhini	555	279	276	50.27	49.73
Megaderma lyra	Yes	Chiroptera	550	273	277	49.64	50.36
Plecturocebus donacophilus	No	Haplorrhini	568	271	297	47.71	52.29
Muntiacus muntjak	Yes	Other	444	270	174	60.81	39.19
Macaca assamensis	Yes	Haplorrhini	501	267	234	53.29	46.71
Nomascus leucogenys	Yes	Haplorrhini	522	265	257	50.77	49.23
Mormoops blainvillei	Yes	Chiroptera	513	257	256	50.1	49.9
Eonycteris spelaea	Yes	Chiroptera	1618	256	1362	15.82	84.18
Mirounga angustirostris	Yes	Pinnipedia	633	256	377	40.44	59.56
Cercopithecus albogularis	No	Haplorrhini	472	253	219	53.6	46.4
Aepyceros melampus	Yes	Other	1176	252	924	21.43	78.57
Hylobates moloch	Yes	Haplorrhini	472	246	226	52.12	47.88
Cercopithecus neglectus	Yes	Haplorrhini	564	244	320	43.26	56.74
Symphalangus syndactylus	Yes	Haplorrhini	606	239	367	39.44	60.56
Hipposideros galeritus	Yes	Chiroptera	551	237	314	43.01	56.99
Hylobates pileatus	Yes	Haplorrhini	477	237	240	49.69	50.31
Rhinopithecus roxellana	Yes	Haplorrhini	475	231	244	48.63	51.37
Nomascus siki	Yes	Haplorrhini	475	230	245	48.42	51.58
Rhinopithecus strykeri	No	Haplorrhini	464	230	234	49.57	50.43
Hoolock leuconedys	Yes	Haplorrhini	465	229	236	49.25	50.75
Tragelaphus buxtoni	Yes	Other	1213	227	986	18.71	81.29
Piliocolobus tephrosceles	No	Haplorrhini	453	224	229	49.45	50.55
Trachypithecus francoisi	Yes	Haplorrhini	454	222	232	48.9	51.1
Pygathrix nemaeus	Yes	Haplorrhini	504	213	291	42.26	57.74
Trachypithecus phayrei crepuscula	No	Haplorrhini	455	212	243	46.59	53.41
Rhinopithecus bieti	Yes	Haplorrhini	495	206	289	41.62	58.38
Pygathrix nigripes	Yes	Haplorrhini	473	202	271	42.71	57.29
Colobus angolensis palliatus	No	Haplorrhini	409	200	209	48.9	51.1
Semnopithecus entellus	Yes	Haplorrhini	469	186	283	39.66	60.34
Arctocephalus gazella	Yes	Pinnipedia	661	185	476	27.99	72.01
Nasalis larvatus	Yes	Haplorrhini	461	184	277	39.91	60.09
Ourebia ourebi	Yes	Other	1026	183	843	17.84	82.16
Tragelaphus oryx	Yes	Other	1412	183	1229	12.96	87.04
Cryptotis parvus	No	Other	1149	182	967	15.84	84.16
Colobus guereza	Yes	Haplorrhini	417	173	244	41.49	58.51
Ateles hybridus	Yes	Haplorrhini	525	152	373	28.95	71.05
Craseonycteris thonglongyai	Yes	Chiroptera	279	151	128	54.12	45.88
Eubalaena glacialis	Yes	Cetacea	321	101	220	31.46	68.54
Eubalaena japonica	Yes	Cetacea	346	97	249	28.03	71.97
Balaenoptera acutorostrata scammoni	No	Cetacea	314	91	223	28.98	71.02
Balaenoptera musculus	Yes	Cetacea	294	88	206	29.93	70.07
Eschrichtius robustus	Yes	Cetacea	314	88	226	28.03	71.97
Balaenoptera ricei	No	Cetacea	287	80	207	27.87	72.13
Hydrodamalis gigas	Yes	Sirenia	658	79	579	12.01	87.99
Balaenoptera physalus	Yes	Cetacea	284	77	207	27.11	72.89
Alcelaphus buselaphus	Yes	Other	446	76	370	17.04	82.96
Megaptera novaeangliae	Yes	Cetacea	278	76	202	27.34	72.66
Balaenoptera bonaerensis	Yes	Cetacea	298	69	229	23.15	76.85
Bradypus variegatus	Yes	Other	431	63	368	14.62	85.38
Caperea marginata	Yes	Cetacea	277	62	215	22.38	77.62
Mesoplodon densirostris	Yes	Cetacea	190	36	154	18.95	81.05
Hyperoodon ampullatus	Yes	Cetacea	183	34	149	18.58	81.42
Mesoplodon bidens	Yes	Cetacea	205	31	174	15.12	84.88
Delphinapterus leucas	Yes	Cetacea	168	28	140	16.67	83.33
Inia geoffrensis	Yes	Cetacea	174	27	147	15.52	84.48
Ziphius cavirostris	Yes	Cetacea	223	27	196	12.11	87.89
Platanista minor	No	Cetacea	208	25	183	12.02	87.98
Globicephala melas	Yes	Cetacea	161	22	139	13.66	86.34
Phocoena sinus	Yes	Cetacea	162	22	140	13.58	86.42
Kogia breviceps	Yes	Cetacea	159	21	138	13.21	86.79
Phocoena phocoena	Yes	Cetacea	164	21	143	12.8	87.2
Lagenorhynchus obliquidens	Yes	Cetacea	158	20	138	12.66	87.34
Neophocaena asiaeorientalis asiaeorientalis	No	Cetacea	166	20	146	12.05	87.95
Pontoporia blainvillei	Yes	Cetacea	165	20	145	12.12	87.88
Grampus griseus	Yes	Cetacea	166	19	147	11.45	88.55
Monodon monoceros	Yes	Cetacea	159	19	140	11.95	88.05
Orcinus orca	Yes	Cetacea	159	19	140	11.95	88.05
Platanista gangetica	Yes	Cetacea	213	19	194	8.92	91.08
Sousa chinensis	Yes	Cetacea	157	19	138	12.1	87.9
Lipotes vexillifer	Yes	Cetacea	184	18	166	9.78	90.22
Steno bredanensis	Yes	Cetacea	157	18	139	11.46	88.54
Tursiops aduncus	Yes	Cetacea	164	13	151	7.93	92.07
Tursiops truncatus	Yes	Cetacea	155	13	142	8.39	91.61

## Sheet: Supplementary-Table-3
Species Name	Group	Clusters at 100%	Deviation at 100%	Clusters at 95%	Deviation at 95%	Clusters at 90%	Deviation at 90%	Clusters at 85%	Deviation at 85%	Clusters at 80%	Deviation at 80%	Clusters at 75%	Deviation at 75%	Clusters at 70%	Deviation at 70%	Clusters at 65%	Deviation at 65%	Clusters at 60%	Deviation at 60%	Clusters at 55%	Deviation at 55%	Clusters at 50%	Deviation at 50%	Clusters at 45%	Deviation at 45%	Clusters at 40%	Deviation at 40%
Acinonyx jubatus	Other	771	89.42	702	68.73	633	71.35	574	81.61	517	84.35	468	89.94	398	75.53	327	58.48	261	47.68	186	35.15	98	5.22	62	12.28	25	3.34
Acomys cahirinus	Other	825	143.42	766	132.73	695	133.35	641	148.61	570	137.35	491	112.94	402	79.53	334	65.48	255	41.68	172	21.15	119	26.22	57	7.28	21	-0.66
Acomys dimidiatus	Other	829	147.42	774	140.73	710	148.35	656	163.61	583	150.35	496	117.94	410	87.53	340	71.48	255	41.68	175	24.15	116	23.22	60	10.28	22	0.34
Acomys kempi	Other	768	86.42	721	87.73	660	98.35	602	109.61	537	104.35	461	82.94	379	56.53	312	43.48	236	22.68	168	17.15	104	11.22	55	5.28	22	0.34
Acomys percivali	Other	739	57.42	704	70.73	660	98.35	615	122.61	555	122.35	466	87.94	394	71.53	322	53.48	243	29.68	167	16.15	104	11.22	52	2.28	18	-3.66
Acomys russatus	Other	813	131.42	759	125.73	683	121.35	629	136.61	572	139.35	493	114.94	404	81.53	337	68.48	253	39.68	167	16.15	112	19.22	58	8.28	29	7.34
Addax nasomaculatus	Other	728	46.42	698	64.73	654	92.35	575	82.61	519	86.35	451	72.94	387	64.53	313	44.48	248	34.68	173	22.15	111	18.22	62	12.28	32	10.34
Aeorestes cinereus	Chiroptera	323	-358.58	317	-316.27	304	-257.65	278	-214.39	257	-175.65	234	-144.06	196	-126.47	166	-102.52	141	-72.32	104	-46.85	57	-35.78	32	-17.72	12	-9.66
Aepyceros melampus	Other	251	-430.58	243	-390.27	233	-328.65	226	-266.39	219	-213.65	203	-175.06	182	-140.47	163	-105.52	136	-77.32	107	-43.85	82	-10.78	51	1.28	27	5.34
Ailuropoda melanoleuca	Other	731	49.42	695	61.73	647	85.35	572	79.61	498	65.35	441	62.94	377	54.53	315	46.48	262	48.68	189	38.15	118	25.22	60	10.28	28	6.34
Ailurus styani	Other	810	128.42	750	116.73	682	120.35	606	113.61	538	105.35	471	92.94	394	71.53	321	52.48	253	39.68	174	23.15	98	5.22	54	4.28	21	-0.66
Alcelaphus buselaphus	Other	76	-605.58	76	-557.27	76	-485.65	76	-416.39	75	-357.65	74	-304.06	69	-253.47	67	-201.52	60	-153.32	51	-99.85	40	-52.78	24	-25.72	10	-11.66
Alces alces	Other	823	141.42	801	167.73	738	176.35	656	163.61	560	127.35	475	96.94	405	82.53	340	71.48	267	53.68	189	38.15	111	18.22	60	10.28	23	1.34
Alexandromys oeconomus	Other	942	260.42	886	252.73	772	210.35	655	162.61	564	131.35	472	93.94	401	78.53	320	51.48	248	34.68	168	17.15	103	10.22	57	7.28	17	-4.66
Alouatta palliata	Haplorrhini	314	-367.58	308	-325.27	301	-260.65	294	-198.39	282	-150.65	269	-109.06	248	-74.47	216	-52.52	171	-42.32	133	-17.85	85	-7.78	42	-7.72	20	-1.66
Ammotragus lervia	Other	851	169.42	815	181.73	736	174.35	636	143.61	548	115.35	468	89.94	402	79.53	330	61.48	258	44.68	172	21.15	104	11.22	56	6.28	26	4.34
Anoura caudifer	Chiroptera	369	-312.58	353	-280.27	312	-249.65	285	-207.39	258	-174.65	237	-141.06	212	-110.47	187	-81.52	155	-58.32	112	-38.85	56	-36.78	31	-18.72	13	-8.66
Antechinus flavipes	Other	1056	374.42	960	326.73	792	230.35	654	161.61	534	101.35	427	48.94	357	34.53	283	14.48	212	-1.32	140	-10.85	89	-3.78	48	-1.72	18	-3.66
Antechinus stuartii	Other	1066	384.42	1003	369.73	871	309.35	727	234.61	591	158.35	479	100.94	382	59.53	298	29.48	224	10.68	150	-0.85	93	0.22	46	-3.72	18	-3.66
Antidorcas marsupialis	Other	759	77.42	729	95.73	685	123.35	611	118.61	555	122.35	493	114.94	420	97.53	352	83.48	286	72.68	207	56.15	145	52.22	90	40.28	53	31.34
Antilocapra americana	Other	712	30.42	693	59.73	629	67.35	567	74.61	496	63.35	435	56.94	367	44.53	304	35.48	241	27.68	178	27.15	112	19.22	57	7.28	17	-4.66
Antrozous pallidus	Chiroptera	460	-221.58	419	-214.27	373	-188.65	338	-154.39	311	-121.65	284	-94.06	229	-93.47	193	-75.52	163	-50.32	112	-38.85	63	-29.78	31	-18.72	13	-8.66
Aotus nancymaae	Haplorrhini	404	-277.58	395	-238.27	384	-177.65	364	-128.39	347	-85.65	318	-60.06	283	-39.47	239	-29.52	201	-12.32	143	-7.85	83	-9.78	42	-7.72	18	-3.66
Aplodontia rufa	Other	719	37.42	698	64.73	652	90.35	590	97.61	502	69.35	426	47.94	367	44.53	302	33.48	247	33.68	173	22.15	97	4.22	46	-3.72	21	-0.66
Apodemus speciosus	Other	687	5.42	682	48.73	643	81.35	563	70.61	482	49.35	413	34.94	348	25.53	287	18.48	224	10.68	162	11.15	105	12.22	53	3.28	21	-0.66
Apodemus sylvaticus	Other	1408	726.42	1180	546.73	977	415.35	789	296.61	664	231.35	544	165.94	444	121.53	356	87.48	282	68.68	184	33.15	115	22.22	58	8.28	20	-1.66
Arctocephalus gazella	Pinnipedia	185	-496.58	181	-452.27	176	-385.65	174	-318.39	172	-260.65	165	-213.06	159	-163.47	146	-122.52	130	-83.32	110	-40.85	72	-20.78	44	-5.72	21	-0.66
Arctocephalus townsendi	Pinnipedia	322	-359.58	319	-314.27	300	-261.65	285	-207.39	275	-157.65	250	-128.06	232	-90.47	204	-64.52	167	-46.32	130	-20.85	84	-8.78	46	-3.72	23	1.34
Artibeus jamaicensis	Chiroptera	587	-94.58	511	-122.27	411	-150.65	345	-147.39	302	-130.65	278	-100.06	241	-81.47	207	-61.52	174	-39.32	131	-19.85	79	-13.78	46	-3.72	18	-3.66
Arvicanthis niloticus	Other	1102	420.42	987	353.73	860	298.35	747	254.61	642	209.35	543	164.94	451	128.53	354	85.48	278	64.68	185	34.15	103	10.22	55	5.28	18	-3.66
Arvicola amphibius	Other	967	285.42	902	268.73	781	219.35	669	176.61	566	133.35	479	100.94	409	86.53	337	68.48	255	41.68	179	28.15	105	12.22	57	7.28	19	-2.66
Ateles geoffroyi	Haplorrhini	324	-357.58	319	-314.27	310	-251.65	299	-193.39	290	-142.65	268	-110.06	244	-78.47	213	-55.52	179	-34.32	135	-15.85	85	-7.78	51	1.28	18	-3.66
Ateles hybridus	Haplorrhini	152	-529.58	152	-481.27	149	-412.65	148	-344.39	143	-289.65	142	-236.06	138	-184.47	130	-138.52	114	-99.32	96	-54.85	70	-22.78	41	-8.72	25	3.34
Axis porcinus	Other	1176	494.42	1056	422.73	897	335.35	764	271.61	627	194.35	524	145.94	433	110.53	354	85.48	275	61.68	183	32.15	110	17.22	57	7.28	27	5.34
Balaenoptera acutorostrata scammoni	Cetacea	91	-590.58	89	-544.27	87	-474.65	83	-409.39	79	-353.65	76	-302.06	74	-248.47	71	-197.52	65	-148.32	56	-94.85	48	-44.78	35	-14.72	19	-2.66
Balaenoptera bonaerensis	Cetacea	69	-612.58	69	-564.27	69	-492.65	69	-423.39	65	-367.65	64	-314.06	62	-260.47	59	-209.52	57	-156.32	51	-99.85	42	-50.78	29	-20.72	14	-7.66
Balaenoptera musculus	Cetacea	88	-593.58	87	-546.27	84	-477.65	80	-412.39	76	-356.65	74	-304.06	70	-252.47	67	-201.52	62	-151.32	55	-95.85	44	-48.78	31	-18.72	16	-5.66
Balaenoptera physalus	Cetacea	77	-604.58	75	-558.27	75	-486.65	70	-422.39	67	-365.65	66	-312.06	64	-258.47	63	-205.52	57	-156.32	51	-99.85	41	-51.78	29	-20.72	13	-8.66
Balaenoptera ricei	Cetacea	80	-601.58	79	-554.27	75	-486.65	72	-420.39	67	-365.65	65	-313.06	63	-259.47	59	-209.52	57	-156.32	51	-99.85	42	-50.78	26	-23.72	11	-10.66
Beatragus hunteri	Other	739	57.42	722	88.73	659	97.35	574	81.61	511	78.35	450	71.94	374	51.53	313	44.48	247	33.68	173	22.15	109	16.22	63	13.28	32	10.34
Bison bison bison	Other	873	191.42	843	209.73	757	195.35	646	153.61	558	125.35	482	103.94	406	83.53	328	59.48	254	40.68	170	19.15	104	11.22	57	7.28	25	3.34
Bos frontalis	Other	778	96.42	765	131.73	707	145.35	620	127.61	537	104.35	479	100.94	402	79.53	326	57.48	255	41.68	182	31.15	110	17.22	64	14.28	26	4.34
Bos gaurus	Other	1058	376.42	900	266.73	790	228.35	673	180.61	581	148.35	489	110.94	413	90.53	333	64.48	268	54.68	192	41.15	113	20.22	69	19.28	27	5.34
Bos gaurus x Bos taurus	Other	1135	453.42	1002	368.73	863	301.35	717	224.61	616	183.35	524	145.94	439	116.53	353	84.48	274	60.68	194	43.15	118	25.22	69	19.28	30	8.34
Bos grunniens	Other	703	21.42	683	49.73	622	60.35	538	45.61	462	29.35	399	20.94	341	18.53	289	20.48	239	25.68	174	23.15	112	19.22	65	15.28	24	2.34
Bos grunniens x Bos taurus	Other	1072	390.42	971	337.73	837	275.35	705	212.61	592	159.35	511	132.94	433	110.53	345	76.48	273	59.68	187	36.15	112	19.22	63	13.28	27	5.34
Bos indicus	Other	867	185.42	778	144.73	704	142.35	595	102.61	517	84.35	461	82.94	386	63.53	323	54.48	258	44.68	190	39.15	116	23.22	66	16.28	33	11.34
Bos indicus x Bos taurus	Other	1139	457.42	1009	375.73	861	299.35	726	233.61	612	179.35	520	141.94	438	115.53	357	88.48	276	62.68	193	42.15	116	23.22	64	14.28	30	8.34
Bos mutus	Other	906	224.42	831	197.73	755	193.35	663	170.61	560	127.35	490	111.94	409	86.53	327	58.48	262	48.68	184	33.15	116	23.22	60	10.28	30	8.34
Bos taurus	Other	1092	410.42	983	349.73	856	294.35	716	223.61	611	178.35	524	145.94	434	111.53	353	84.48	279	65.68	192	41.15	114	21.22	63	13.28	29	7.34
Bos taurus x Bison bison	Other	1118	436.42	1000	366.73	878	316.35	727	234.61	620	187.35	525	146.94	440	117.53	357	88.48	275	61.68	187	36.15	116	23.22	67	17.28	33	11.34
Bradypus variegatus	Other	63	-618.58	62	-571.27	61	-500.65	60	-432.39	60	-372.65	60	-318.06	59	-263.47	59	-209.52	55	-158.32	49	-101.85	40	-52.78	27	-22.72	13	-8.66
Bubalus bubalis	Other	1132	450.42	985	351.73	840	278.35	711	218.61	615	182.35	523	144.94	434	111.53	349	80.48	276	62.68	194	43.15	112	19.22	64	14.28	32	10.34
Bubalus depressicornis	Other	929	247.42	891	257.73	782	220.35	668	175.61	575	142.35	500	121.94	417	94.53	342	73.48	265	51.68	184	33.15	113	20.22	61	11.28	27	5.34
Budorcas taxicolor	Other	922	240.42	868	234.73	771	209.35	653	160.61	565	132.35	496	117.94	414	91.53	342	73.48	264	50.68	179	28.15	107	14.22	54	4.28	26	4.34
Callithrix jacchus	Other	379	-302.58	367	-266.27	354	-207.65	339	-153.39	323	-109.65	301	-77.06	270	-52.47	226	-42.52	187	-26.32	127	-23.85	84	-8.78	43	-6.72	16	-5.66
Callorhinus ursinus	Pinnipedia	368	-313.58	342	-291.27	323	-238.65	307	-185.39	287	-145.65	266	-112.06	250	-72.47	213	-55.52	178	-35.32	138	-12.85	93	0.22	47	-2.72	23	1.34
Camelus bactrianus	Other	586	-95.58	559	-74.27	523	-38.65	481	-11.39	446	13.35	414	35.94	363	40.53	299	30.48	239	25.68	176	25.15	95	2.22	52	2.28	24	2.34
Camelus dromedarius	Other	588	-93.58	566	-67.27	543	-18.65	504	11.61	468	35.35	433	54.94	373	50.53	306	37.48	247	33.68	176	25.15	102	9.22	53	3.28	22	0.34
Camelus ferus	Other	586	-95.58	554	-79.27	516	-45.65	481	-11.39	445	12.35	408	29.94	360	37.53	299	30.48	234	20.68	168	17.15	97	4.22	60	10.28	27	5.34
Canis lupus dingo	Other	770	88.42	690	56.73	606	44.35	550	57.61	480	47.35	437	58.94	358	35.53	296	27.48	230	16.68	155	4.15	85	-7.78	44	-5.72	16	-5.66
Canis lupus familiaris	Other	687	5.42	650	16.73	588	26.35	533	40.61	474	41.35	428	49.94	355	32.53	296	27.48	229	15.68	156	5.15	86	-6.78	46	-3.72	18	-3.66
Caperea marginata	Cetacea	61	-620.58	61	-572.27	61	-500.65	60	-432.39	57	-375.65	57	-321.06	54	-268.47	52	-216.52	49	-164.32	43	-107.85	35	-57.78	21	-28.72	12	-9.66
Capra aegagrus	Other	837	155.42	788	154.73	711	149.35	618	125.61	534	101.35	470	91.94	398	75.53	323	54.48	262	48.68	186	35.15	107	14.22	63	13.28	31	9.34
Capra hircus	Other	910	228.42	849	215.73	748	186.35	640	147.61	553	120.35	483	104.94	415	92.53	333	64.48	271	57.68	185	34.15	109	16.22	58	8.28	31	9.34
Capra ibex	Other	342	-339.58	324	-309.27	296	-265.65	252	-240.39	228	-204.65	208	-170.06	188	-134.47	160	-108.52	126	-87.32	83	-67.85	59	-33.78	35	-14.72	16	-5.66
Capra sibirica	Other	905	223.42	862	228.73	766	204.35	660	167.61	568	135.35	495	116.94	425	102.53	351	82.48	273	59.68	189	38.15	119	26.22	65	15.28	38	16.34
Capreolus capreolus	Other	399	-282.58	399	-234.27	397	-164.65	388	-104.39	351	-81.65	318	-60.06	271	-51.47	230	-38.52	184	-29.32	136	-14.85	91	-1.78	46	-3.72	19	-2.66
Capreolus pygargus	Other	886	204.42	864	230.73	793	231.35	697	204.61	589	156.35	499	120.94	399	76.53	343	74.48	261	47.68	187	36.15	112	19.22	61	11.28	25	3.34
Capromys pilorides	Other	800	118.42	744	110.73	672	110.35	567	74.61	473	40.35	400	21.94	339	16.53	284	15.48	226	12.68	160	9.15	112	19.22	62	12.28	23	1.34
Caracal caracal	Other	650	-31.58	626	-7.27	585	23.35	550	57.61	512	79.35	459	80.94	388	65.53	326	57.48	247	33.68	175	24.15	96	3.22	53	3.28	21	-0.66
Carlito syrichta	Haplorrhini	419	-262.58	416	-217.27	402	-159.65	385	-107.39	364	-68.65	332	-46.06	294	-28.47	249	-19.52	204	-9.32	153	2.15	91	-1.78	49	-0.72	20	-1.66
Carollia perspicillata	Chiroptera	359	-322.58	338	-295.27	286	-275.65	235	-257.39	205	-227.65	186	-192.06	171	-151.47	152	-116.52	134	-79.32	99	-51.85	60	-32.78	33	-16.72	15	-6.66
Castor canadensis	Other	720	38.42	670	36.73	612	50.35	558	65.61	480	47.35	409	30.94	351	28.53	292	23.48	232	18.68	168	17.15	110	17.22	60	10.28	31	9.34
Catagonus wagneri	Other	736	54.42	709	75.73	667	105.35	581	88.61	515	82.35	460	81.94	377	54.53	313	44.48	268	54.68	186	35.15	107	14.22	53	3.28	21	-0.66
Cavia aperea	Other	323	-358.58	302	-331.27	273	-288.65	248	-244.39	234	-198.65	222	-156.06	211	-111.47	187	-81.52	158	-55.32	122	-28.85	85	-7.78	45	-4.72	22	0.34
Cavia porcellus	Other	819	137.42	730	96.73	623	61.35	535	42.61	473	40.35	427	48.94	374	51.53	321	52.48	244	30.68	171	20.15	110	17.22	61	11.28	32	10.34
Cavia tschudii	Other	831	149.42	758	124.73	649	87.35	555	62.61	489	56.35	436	57.94	383	60.53	332	63.48	255	41.68	173	22.15	113	20.22	59	9.28	31	9.34
Cebus albifrons	Haplorrhini	368	-313.58	362	-271.27	349	-212.65	333	-159.39	316	-116.65	301	-77.06	276	-46.47	231	-37.52	194	-19.32	138	-12.85	87	-5.78	42	-7.72	19	-2.66
Cebus imitator	Haplorrhini	404	-277.58	398	-235.27	382	-179.65	365	-127.39	346	-86.65	327	-51.06	297	-25.47	251	-17.52	206	-7.32	145	-5.85	92	-0.78	48	-1.72	20	-1.66
Cephalopachus bancanus	Haplorrhini	395	-286.58	388	-245.27	381	-180.65	363	-129.39	343	-89.65	316	-62.06	267	-55.47	233	-35.52	199	-14.32	156	5.15	94	1.22	49	-0.72	22	0.34
Cephalophus harveyi	Other	951	269.42	854	220.73	754	192.35	660	167.61	580	147.35	508	129.94	426	103.53	351	82.48	279	65.68	202	51.15	123	30.22	72	22.28	38	16.34
Ceratotherium simum simum	Other	1011	329.42	980	346.73	841	279.35	658	165.61	546	113.35	467	88.94	403	80.53	329	60.48	267	53.68	191	40.15	116	23.22	64	14.28	25	3.34
Cercocebus atys	Haplorrhini	373	-308.58	365	-268.27	348	-213.65	335	-157.39	318	-114.65	302	-76.06	269	-53.47	226	-42.52	188	-25.32	145	-5.85	90	-2.78	49	-0.72	21	-0.66
Cercopithecus albogularis	Haplorrhini	253	-428.58	250	-383.27	242	-319.65	236	-256.39	225	-207.65	210	-168.06	198	-124.47	170	-98.52	152	-61.32	116	-34.85	78	-14.78	43	-6.72	19	-2.66
Cercopithecus mitis	Haplorrhini	279	-402.58	277	-356.27	266	-295.65	252	-240.39	242	-190.65	227	-151.06	211	-111.47	184	-84.52	159	-54.32	119	-31.85	80	-12.78	42	-7.72	15	-6.66
Cercopithecus mona	Haplorrhini	295	-386.58	283	-350.27	275	-286.65	266	-226.39	253	-179.65	237	-141.06	219	-103.47	194	-74.52	162	-51.32	124	-26.85	78	-14.78	40	-9.72	19	-2.66
Cercopithecus neglectus	Haplorrhini	244	-437.58	243	-390.27	237	-324.65	233	-259.39	226	-206.65	212	-166.06	195	-127.47	176	-92.52	147	-66.32	110	-40.85	80	-12.78	43	-6.72	19	-2.66
Cervus albirostris	Other	1130	448.42	1032	398.73	890	328.35	760	267.61	634	201.35	535	156.94	435	112.53	356	87.48	284	70.68	192	41.15	120	27.22	76	26.28	30	8.34
Cervus canadensis	Other	1167	485.42	1066	432.73	913	351.35	766	273.61	634	201.35	534	155.94	440	117.53	359	90.48	280	66.68	196	45.15	116	23.22	62	12.28	29	7.34
Cervus elaphus	Other	1283	601.42	1088	454.73	935	373.35	784	291.61	652	219.35	549	170.94	444	121.53	369	100.48	271	57.68	186	35.15	117	24.22	60	10.28	27	5.34
Cervus hanglu yarkandensis	Other	1008	326.42	943	309.73	845	283.35	728	235.61	612	179.35	524	145.94	435	112.53	354	85.48	270	56.68	184	33.15	112	19.22	65	15.28	25	3.34
Chaetophractus vellerosus	Other	889	207.42	861	227.73	742	180.35	607	114.61	489	56.35	401	22.94	337	14.53	290	21.48	228	14.68	165	14.15	104	11.22	56	6.28	33	11.34
Cheirogaleus medius	Other	604	-77.58	599	-34.27	553	-8.65	487	-5.39	439	6.35	389	10.94	333	10.53	278	9.48	226	12.68	154	3.15	83	-9.78	37	-12.72	17	-4.66
Chinchilla lanigera	Other	704	22.42	682	48.73	641	79.35	562	69.61	510	77.35	451	72.94	393	70.53	329	60.48	253	39.68	169	18.15	105	12.22	49	-0.72	23	1.34
Chlorocebus aethiops	Haplorrhini	292	-389.58	290	-343.27	280	-281.65	267	-225.39	250	-182.65	234	-144.06	214	-108.47	190	-78.52	157	-56.32	115	-35.85	76	-16.78	37	-12.72	16	-5.66
Chlorocebus sabaeus	Haplorrhini	328	-353.58	322	-311.27	310	-251.65	301	-191.39	282	-150.65	262	-116.06	244	-78.47	211	-57.52	172	-41.32	133	-17.85	83	-9.78	43	-6.72	18	-3.66
Choloepus didactylus	Other	1486	804.42	1350	716.73	1066	504.35	829	336.61	655	222.35	542	163.94	453	130.53	374	105.48	297	83.68	210	59.15	127	34.22	67	17.28	35	13.34
Choloepus hoffmanni	Other	1548	866.42	1376	742.73	1079	517.35	843	350.61	682	249.35	552	173.94	461	138.53	377	108.48	305	91.68	219	68.15	143	50.22	70	20.28	33	11.34
Chrysochloris asiatica	Other	1049	367.42	1020	386.73	899	337.35	701	208.61	547	114.35	458	79.94	397	74.53	325	56.48	248	34.68	167	16.15	101	8.22	52	2.28	21	-0.66
Chrysocyon brachyurus	Other	634	-47.58	610	-23.27	557	-4.65	509	16.61	456	23.35	409	30.94	342	19.53	286	17.48	225	11.68	153	2.15	90	-2.78	48	-1.72	23	1.34
Coendou prehensilis	Other	628	-53.58	616	-17.27	573	11.35	516	23.61	453	20.35	400	21.94	337	14.53	275	6.48	223	9.68	152	1.15	105	12.22	57	7.28	23	1.34
Colobus angolensis palliatus	Haplorrhini	199	-482.58	198	-435.27	193	-368.65	190	-302.39	183	-249.65	176	-202.06	164	-158.47	145	-123.52	126	-87.32	101	-49.85	73	-19.78	41	-8.72	22	0.34
Colobus guereza	Haplorrhini	173	-508.58	173	-460.27	169	-392.65	164	-328.39	162	-270.65	155	-223.06	146	-176.47	127	-141.52	109	-104.32	84	-66.85	64	-28.78	39	-10.72	17	-4.66
Condylura cristata	Other	654	-27.58	637	3.73	594	32.35	495	2.61	411	-21.65	353	-25.06	300	-22.47	258	-10.52	206	-7.32	148	-2.85	77	-15.78	40	-9.72	15	-6.66
Connochaetes taurinus	Other	795	113.42	766	132.73	703	141.35	608	115.61	532	99.35	473	94.94	395	72.53	334	65.48	258	44.68	186	35.15	118	25.22	72	22.28	32	10.34
Craseonycteris thonglongyai	Chiroptera	151	-530.58	149	-484.27	146	-415.65	141	-351.39	141	-291.65	134	-244.06	128	-194.47	115	-153.52	99	-114.32	78	-72.85	55	-37.78	27	-22.72	13	-8.66
Cricetomys gambianus	Other	886	204.42	809	175.73	703	141.35	603	110.61	526	93.35	436	57.94	363	40.53	298	29.48	228	14.68	156	5.15	98	5.22	52	2.28	22	0.34
Cricetulus griseus	Other	969	287.42	899	265.73	805	243.35	723	230.61	607	174.35	510	131.94	430	107.53	346	77.48	265	51.68	175	24.15	109	16.22	50	0.28	20	-1.66
Crocidura indochinensis	Other	753	71.42	706	72.73	605	43.35	536	43.61	469	36.35	396	17.94	323	0.53	260	-8.52	203	-10.32	151	0.15	86	-6.78	47	-2.72	20	-1.66
Crocuta crocuta	Other	788	106.42	730	96.73	653	91.35	596	103.61	541	108.35	474	95.94	402	79.53	323	54.48	252	38.68	169	18.15	91	-1.78	51	1.28	15	-6.66
Cryptoprocta ferox	Other	643	-38.58	632	-1.27	591	29.35	555	62.61	505	72.35	448	69.94	380	57.53	308	39.48	243	29.68	173	22.15	99	6.22	53	3.28	21	-0.66
Cryptotis parvus	Other	182	-499.58	181	-452.27	180	-381.65	175	-317.39	160	-272.65	150	-228.06	136	-186.47	127	-141.52	114	-99.32	97	-53.85	76	-16.78	47	-2.72	25	3.34
Ctenodactylus gundi	Other	344	-337.58	341	-292.27	337	-224.65	322	-170.39	306	-126.65	286	-92.06	258	-64.47	227	-41.52	179	-34.32	129	-21.85	79	-13.78	46	-3.72	22	0.34
Ctenomys sociabilis	Other	611	-70.58	603	-30.27	561	-0.65	509	16.61	453	20.35	405	26.94	348	25.53	289	20.48	224	10.68	147	-3.85	97	4.22	54	4.28	22	0.34
Cuniculus paca	Other	688	6.42	671	37.73	620	58.35	544	51.61	456	23.35	395	16.94	339	16.53	284	15.48	227	13.68	166	15.15	95	2.22	55	5.28	20	-1.66
Cynocephalus volans	Other	1015	333.42	787	153.73	650	88.35	574	81.61	517	84.35	447	68.94	385	62.53	322	53.48	262	48.68	185	34.15	104	11.22	54	4.28	23	1.34
Cynomys gunnisoni	Other	1177	495.42	1045	411.73	869	307.35	735	242.61	610	177.35	517	138.94	439	116.53	353	84.48	276	62.68	185	34.15	119	26.22	71	21.28	28	6.34
Cynopterus brachyotis	Chiroptera	389	-292.58	383	-250.27	363	-198.65	325	-167.39	294	-138.65	270	-108.06	240	-82.47	210	-58.52	166	-47.32	116	-34.85	76	-16.78	36	-13.72	15	-6.66
Damaliscus lunatus	Other	887	205.42	809	175.73	714	152.35	616	123.61	543	110.35	483	104.94	387	64.53	328	59.48	254	40.68	181	30.15	107	14.22	61	11.28	28	6.34
Dasyprocta punctata	Other	1817	1135.42	1543	909.73	1231	669.35	909	416.61	696	263.35	566	187.94	462	139.53	375	106.48	286	72.68	207	56.15	136	43.22	73	23.28	38	16.34
Dasypus novemcinctus	Other	1532	850.42	1391	757.73	1138	576.35	906	413.61	690	257.35	540	161.94	446	123.53	357	88.48	280	66.68	194	43.15	111	18.22	60	10.28	27	5.34
Dasyurus viverrinus	Other	1143	461.42	1028	394.73	861	299.35	716	223.61	584	151.35	473	94.94	386	63.53	301	32.48	229	15.68	152	1.15	95	2.22	49	-0.72	22	0.34
Daubentonia madagascariensis	Other	656	-25.58	623	-10.27	582	20.35	540	47.61	503	70.35	442	63.94	385	62.53	320	51.48	255	41.68	173	22.15	99	6.22	50	0.28	23	1.34
Delphinapterus leucas	Cetacea	28	-653.58	28	-605.27	28	-533.65	28	-464.39	27	-405.65	27	-351.06	25	-297.47	25	-243.52	25	-188.32	23	-127.85	22	-70.78	18	-31.72	14	-7.66
Desmodus rotundus	Chiroptera	684	2.42	539	-94.27	406	-155.65	356	-136.39	324	-108.65	292	-86.06	258	-64.47	213	-55.52	180	-33.32	131	-19.85	75	-17.78	43	-6.72	22	0.34
Dicerorhinus sumatrensis harrissoni	Other	947	265.42	926	292.73	814	252.35	646	153.61	540	107.35	467	88.94	393	70.53	323	54.48	264	50.68	194	43.15	119	26.22	75	25.28	27	5.34
Dicrostonyx torquatus	Other	588	-93.58	585	-48.27	555	-6.65	515	22.61	461	28.35	408	29.94	350	27.53	304	35.48	225	11.68	151	0.15	87	-5.78	44	-5.72	15	-6.66
Dinomys branickii	Other	881	199.42	858	224.73	765	203.35	668	175.61	559	126.35	474	95.94	411	88.53	342	73.48	271	57.68	193	42.15	124	31.22	63	13.28	35	13.34
Dipodomys merriami	Other	971	289.42	840	206.73	717	155.35	631	138.61	535	102.35	454	75.94	375	52.53	312	43.48	247	33.68	171	20.15	101	8.22	57	7.28	20	-1.66
Dipodomys ordii	Other	831	149.42	779	145.73	707	145.35	628	135.61	534	101.35	449	70.94	380	57.53	315	46.48	250	36.68	171	20.15	102	9.22	53	3.28	23	1.34
Dipodomys spectabilis	Other	872	190.42	796	162.73	708	146.35	622	129.61	541	108.35	449	70.94	381	58.53	317	48.48	253	39.68	174	23.15	104	11.22	55	5.28	24	2.34
Dipodomys stephensi	Other	784	102.42	744	110.73	668	106.35	583	90.61	496	63.35	415	36.94	351	28.53	290	21.48	236	22.68	165	14.15	102	9.22	55	5.28	21	-0.66
Dolichotis patagonum	Other	522	-159.58	507	-126.27	479	-82.65	439	-53.39	396	-36.65	362	-16.06	320	-2.47	271	2.48	211	-2.32	154	3.15	103	10.22	60	10.28	24	2.34
Dromiciops gliroides	Other	881	199.42	833	199.73	744	182.35	648	155.61	565	132.35	461	82.94	382	59.53	313	44.48	223	9.68	154	3.15	90	-2.78	44	-5.72	19	-2.66
Dugong dugon	Sirenia	357	-324.58	353	-280.27	341	-220.65	302	-190.39	273	-159.65	253	-125.06	230	-92.47	211	-57.52	178	-35.32	143	-7.85	101	8.22	60	10.28	29	7.34
Echinops telfairi	Other	891	209.42	846	212.73	740	178.35	649	156.61	572	139.35	502	123.94	419	96.53	335	66.48	256	42.68	170	19.15	98	5.22	50	0.28	19	-2.66
Eidolon dupreanum	Chiroptera	436	-245.58	419	-214.27	390	-171.65	350	-142.39	326	-106.65	294	-84.06	264	-58.47	220	-48.52	183	-30.32	131	-19.85	75	-17.78	41	-8.72	17	-4.66
Eidolon helvum	Chiroptera	317	-364.58	317	-316.27	315	-246.65	307	-185.39	296	-136.65	277	-101.06	243	-79.47	212	-56.52	169	-44.32	127	-23.85	77	-15.78	39	-10.72	16	-5.66
Eira barbara	Other	821	139.42	780	146.73	693	131.35	627	134.61	546	113.35	472	93.94	396	73.53	334	65.48	267	53.68	179	28.15	108	15.22	57	7.28	24	2.34
Elaphurus davidianus	Other	1057	375.42	992	358.73	857	295.35	731	238.61	609	176.35	516	137.94	419	96.53	352	83.48	274	60.68	190	39.15	110	17.22	62	12.28	26	4.34
Elephantulus edwardii	Other	898	216.42	859	225.73	797	235.35	708	215.61	601	168.35	509	130.94	426	103.53	348	79.48	275	61.68	178	27.15	103	10.22	55	5.28	22	0.34
Elephas maximus indicus	Other	2376	1694.42	1898	1264.73	1315	753.35	896	403.61	689	256.35	580	201.94	494	171.53	399	130.48	319	105.68	229	78.15	143	50.22	71	21.28	35	13.34
Ellobius lutescens	Other	483	-198.58	470	-163.27	463	-98.65	443	-49.39	408	-24.65	368	-10.06	329	6.53	278	9.48	228	14.68	164	13.15	103	10.22	62	12.28	34	12.34
Ellobius talpinus	Other	369	-312.58	369	-264.27	367	-194.65	358	-134.39	328	-104.65	295	-83.06	268	-54.47	224	-44.52	182	-31.32	134	-16.85	89	-3.78	50	0.28	23	1.34
Enhydra lutris kenyoni	Other	589	-92.58	573	-60.27	516	-45.65	466	-26.39	438	5.35	404	25.94	346	23.53	287	18.48	232	18.68	169	18.15	100	7.22	55	5.28	23	1.34
Eonycteris spelaea	Chiroptera	230	-451.58	219	-414.27	210	-351.65	197	-295.39	188	-244.65	175	-203.06	158	-164.47	145	-123.52	126	-87.32	100	-50.85	63	-29.78	34	-15.72	20	-1.66
Eptesicus fuscus	Chiroptera	406	-275.58	400	-233.27	377	-184.65	345	-147.39	320	-112.65	288	-90.06	239	-83.47	204	-64.52	170	-43.32	125	-25.85	68	-24.78	33	-16.72	12	-9.66
Equus asinus	Other	1008	326.42	969	335.73	852	290.35	686	193.61	588	155.35	510	131.94	420	97.53	353	84.48	272	58.68	191	40.15	117	24.22	69	19.28	28	6.34
Equus caballus	Other	1081	399.42	1032	398.73	885	323.35	710	217.61	601	168.35	517	138.94	428	105.53	357	88.48	274	60.68	190	39.15	113	20.22	62	12.28	24	2.34
Equus przewalskii	Other	866	184.42	847	213.73	776	214.35	646	153.61	561	128.35	489	110.94	406	83.53	343	74.48	275	61.68	189	38.15	115	22.22	67	17.28	27	5.34
Equus quagga	Other	1035	353.42	993	359.73	884	322.35	698	205.61	603	170.35	525	146.94	431	108.53	355	86.48	269	55.68	198	47.15	112	19.22	64	14.28	25	3.34
Erethizon dorsatum	Other	851	169.42	807	173.73	714	152.35	624	131.61	548	115.35	475	96.94	411	88.53	346	77.48	275	61.68	185	34.15	117	24.22	64	14.28	27	5.34
Erinaceus europaeus	Other	961	279.42	893	259.73	812	250.35	731	238.61	642	209.35	554	175.94	454	131.53	371	102.48	288	74.68	197	46.15	107	14.22	53	3.28	18	-3.66
Erythrocebus patas	Haplorrhini	323	-358.58	317	-316.27	307	-254.65	297	-195.39	280	-152.65	262	-116.06	243	-79.47	212	-56.52	181	-32.32	137	-13.85	91	-1.78	45	-4.72	19	-2.66
Eschrichtius robustus	Cetacea	88	-593.58	86	-547.27	82	-479.65	76	-416.39	72	-360.65	70	-308.06	67	-255.47	64	-204.52	60	-153.32	50	-100.85	42	-50.78	25	-24.72	12	-9.66
Eubalaena glacialis	Cetacea	101	-580.58	99	-534.27	96	-465.65	92	-400.39	86	-346.65	86	-292.06	82	-240.47	79	-189.52	70	-143.32	62	-88.85	47	-45.78	31	-18.72	17	-4.66
Eubalaena japonica	Cetacea	97	-584.58	97	-536.27	94	-467.65	92	-400.39	87	-345.65	85	-293.06	81	-241.47	78	-190.52	70	-143.32	63	-87.85	50	-42.78	33	-16.72	15	-6.66
Eudorcas thomsonii	Other	816	134.42	782	148.73	697	135.35	596	103.61	523	90.35	461	82.94	387	64.53	316	47.48	243	29.68	171	20.15	108	15.22	57	7.28	29	7.34
Eulemur flavifrons	Other	600	-81.58	581	-52.27	539	-22.65	497	4.61	463	30.35	422	43.94	358	35.53	291	22.48	235	21.68	153	2.15	90	-2.78	44	-5.72	21	-0.66
Eulemur fulvus	Other	651	-30.58	610	-23.27	538	-23.65	485	-7.39	450	17.35	406	27.94	350	27.53	288	19.48	234	20.68	160	9.15	90	-2.78	51	1.28	21	-0.66
Eulemur macaco	Other	620	-61.58	613	-20.27	574	12.35	523	30.61	482	49.35	432	53.94	366	43.53	298	29.48	242	28.68	155	4.15	90	-2.78	41	-8.72	20	-1.66
Eulemur mongoz	Other	667	-14.58	641	7.73	563	1.35	504	11.61	459	26.35	417	38.94	360	37.53	303	34.48	246	32.68	162	11.15	92	-0.78	50	0.28	23	1.34
Eumetopias jubatus	Pinnipedia	356	-325.58	346	-287.27	323	-238.65	302	-190.39	285	-147.65	263	-115.06	247	-75.47	217	-51.52	179	-34.32	135	-15.85	86	-6.78	44	-5.72	22	0.34
Felis catus	Other	830	148.42	746	112.73	661	99.35	591	98.61	539	106.35	476	97.94	399	76.53	327	58.48	253	39.68	171	20.15	100	7.22	48	-1.72	21	-0.66
Felis chaus	Other	856	174.42	769	135.73	676	114.35	600	107.61	546	113.35	481	102.94	414	91.53	333	64.48	258	44.68	184	33.15	105	12.22	52	2.28	20	-1.66
Felis nigripes	Other	619	-62.58	605	-28.27	565	3.35	516	23.61	474	41.35	429	50.94	365	42.53	300	31.48	238	24.68	166	15.15	99	6.22	56	6.28	20	-1.66
Fukomys damarensis	Other	1152	470.42	1063	429.73	924	362.35	752	259.61	594	161.35	485	106.94	409	86.53	335	66.48	257	43.68	176	25.15	115	22.22	65	15.28	27	5.34
Galago moholi	Other	694	12.42	657	23.73	581	19.35	532	39.61	487	54.35	435	56.94	365	42.53	302	33.48	242	28.68	177	26.15	107	14.22	53	3.28	22	0.34
Galemys pyrenaicus	Other	599	-82.58	580	-53.27	558	-3.65	507	14.61	444	11.35	402	23.94	350	27.53	287	18.48	229	15.68	163	12.15	100	7.22	51	1.28	21	-0.66
Galeopterus variegatus	Other	630	-51.58	594	-39.27	527	-34.65	476	-16.39	424	-8.65	369	-9.06	323	0.53	275	6.48	228	14.68	169	18.15	104	11.22	65	15.28	33	11.34
Giraffa tippelskirchi	Other	608	-73.58	589	-44.27	544	-17.65	486	-6.39	437	4.35	379	0.94	327	4.53	268	-0.52	218	4.68	156	5.15	98	5.22	54	4.28	22	0.34
Glaucomys volans	Other	918	236.42	822	188.73	729	167.35	624	131.61	534	101.35	458	79.94	387	64.53	324	55.48	254	40.68	180	29.15	106	13.22	59	9.28	19	-2.66
Glis glis	Other	808	126.42	770	136.73	688	126.35	593	100.61	497	64.35	433	54.94	371	48.53	308	39.48	247	33.68	173	22.15	94	1.22	41	-8.72	18	-3.66
Globicephala melas	Cetacea	20	-661.58	20	-613.27	20	-541.65	20	-472.39	19	-413.65	19	-359.06	19	-303.47	19	-249.52	18	-195.32	17	-133.85	15	-77.78	13	-36.72	11	-10.66
Gorilla gorilla gorilla	Haplorrhini	394	-287.58	385	-248.27	364	-197.65	345	-147.39	331	-101.65	315	-63.06	278	-44.47	239	-29.52	195	-18.32	148	-2.85	91	-1.78	52	2.28	25	3.34
Gracilinanus agilis	Other	958	276.42	901	267.73	829	267.35	737	244.61	600	167.35	502	123.94	409	86.53	336	67.48	239	25.68	158	7.15	94	1.22	44	-5.72	17	-4.66
Grammomys dolichurus	Other	672	-9.58	642	8.73	600	38.35	537	44.61	475	42.35	406	27.94	348	25.53	287	18.48	226	12.68	147	-3.85	96	3.22	45	-4.72	16	-5.66
Grammomys surdaster	Other	1020	338.42	962	328.73	846	284.35	743	250.61	637	204.35	523	144.94	431	108.53	339	70.48	263	49.68	177	26.15	108	15.22	59	9.28	22	0.34
Grampus griseus	Cetacea	19	-662.58	19	-614.27	19	-542.65	19	-473.39	18	-414.65	18	-360.06	17	-305.47	17	-251.52	17	-196.32	15	-135.85	13	-79.78	11	-38.72	10	-11.66
Graphiurus murinus	Other	767	85.42	659	25.73	592	30.35	540	47.61	472	39.35	406	27.94	346	23.53	298	29.48	235	21.68	158	7.15	98	5.22	45	-4.72	19	-2.66
Gymnobelideus leadbeateri	Other	881	199.42	828	194.73	734	172.35	627	134.61	545	112.35	453	74.94	373	50.53	304	35.48	226	12.68	149	-1.85	96	3.22	49	-0.72	23	1.34
Halichoerus grypus	Pinnipedia	415	-266.58	380	-253.27	353	-208.65	328	-164.39	313	-119.65	292	-86.06	262	-60.47	231	-37.52	186	-27.32	142	-8.85	93	0.22	44	-5.72	21	-0.66
Helarctos malayanus	Other	778	96.42	748	114.73	644	82.35	566	73.61	513	80.35	450	71.94	377	54.53	322	53.48	252	38.68	177	26.15	101	8.22	50	0.28	19	-2.66
Helogale parvula	Other	991	309.42	886	252.73	728	166.35	629	136.61	575	142.35	506	127.94	420	97.53	340	71.48	260	46.68	170	19.15	99	6.22	52	2.28	17	-4.66
Hemitragus hylocrius	Other	761	79.42	731	97.73	670	108.35	593	100.61	520	87.35	455	76.94	389	66.53	314	45.48	254	40.68	175	24.15	107	14.22	56	6.28	28	6.34
Heterocephalus glaber	Other	858	176.42	819	185.73	749	187.35	635	142.61	520	87.35	435	56.94	361	38.53	299	30.48	241	27.68	169	18.15	112	19.22	58	8.28	23	1.34
Heterohyrax brucei	Other	919	237.42	857	223.73	792	230.35	687	194.61	565	132.35	484	105.94	406	83.53	336	67.48	254	40.68	179	28.15	101	8.22	60	10.28	27	5.34
Hexaprotodon liberiensis	Other	1097	415.42	1025	391.73	879	317.35	730	237.61	601	168.35	504	125.94	414	91.53	342	73.48	265	51.68	198	47.15	121	28.22	70	20.28	34	12.34
Hippopotamus amphibius	Other	1266	584.42	1200	566.73	1006	444.35	816	323.61	657	224.35	542	163.94	438	115.53	369	100.48	287	73.68	210	59.15	129	36.22	69	19.28	34	12.34
Hipposideros armiger	Chiroptera	291	-390.58	281	-352.27	272	-289.65	263	-229.39	251	-181.65	226	-152.06	201	-121.47	172	-96.52	144	-69.32	112	-38.85	63	-29.78	31	-18.72	15	-6.66
Hipposideros galeritus	Chiroptera	237	-444.58	232	-401.27	224	-337.65	218	-274.39	209	-223.65	198	-180.06	176	-146.47	154	-114.52	126	-87.32	96	-54.85	58	-34.78	27	-22.72	14	-7.66
Hipposideros pendleburyi	Chiroptera	323	-358.58	307	-326.27	292	-269.65	282	-210.39	263	-169.65	242	-136.06	212	-110.47	185	-83.52	153	-60.32	115	-35.85	68	-24.78	30	-19.72	15	-6.66
Hippotragus equinus	Other	827	145.42	784	150.73	712	150.35	623	130.61	543	110.35	473	94.94	386	63.53	317	48.48	253	39.68	181	30.15	113	20.22	63	13.28	25	3.34
Hippotragus niger niger	Other	861	179.42	830	196.73	745	183.35	642	149.61	566	133.35	489	110.94	403	80.53	330	61.48	257	43.68	183	32.15	108	15.22	64	14.28	29	7.34
Homo sapiens	Haplorrhini	410	-271.58	392	-241.27	366	-195.65	351	-141.39	333	-99.65	311	-67.06	277	-45.47	244	-24.52	197	-16.32	148	-2.85	98	5.22	46	-3.72	21	-0.66
Hoolock leuconedys	Haplorrhini	229	-452.58	226	-407.27	217	-344.65	209	-283.39	203	-229.65	188	-190.06	179	-143.47	161	-107.52	140	-73.32	112	-38.85	86	-6.78	46	-3.72	20	-1.66
Hyaena hyaena	Other	783	101.42	717	83.73	652	90.35	607	114.61	553	120.35	482	103.94	398	75.53	329	60.48	254	40.68	166	15.15	96	3.22	48	-1.72	17	-4.66
Hydrochoerus hydrochaeris	Other	738	56.42	711	77.73	629	67.35	553	60.61	477	44.35	418	39.94	366	43.53	310	41.48	247	33.68	188	37.15	126	33.22	68	18.28	33	11.34
Hydrodamalis gigas	Sirenia	79	-602.58	79	-554.27	79	-482.65	79	-413.39	78	-354.65	78	-300.06	77	-245.47	75	-193.52	71	-142.32	69	-81.85	51	-41.78	30	-19.72	19	-2.66
Hydropotes inermis	Other	869	187.42	852	218.73	780	218.35	680	187.61	571	138.35	486	107.94	400	77.53	331	62.48	259	45.68	184	33.15	114	21.22	62	12.28	21	-0.66
Hylobates moloch	Haplorrhini	246	-435.58	244	-389.27	235	-326.65	226	-266.39	210	-222.65	198	-180.06	188	-134.47	170	-98.52	145	-68.32	113	-37.85	79	-13.78	44	-5.72	18	-3.66
Hylobates pileatus	Haplorrhini	236	-445.58	228	-405.27	223	-338.65	211	-281.39	201	-231.65	193	-185.06	180	-142.47	158	-110.52	139	-74.32	106	-44.85	73	-19.78	42	-7.72	23	1.34
Hylomyscus alleni	Other	647	-34.58	623	-10.27	572	10.35	508	15.61	441	8.35	383	4.94	318	-4.47	270	1.48	215	1.68	151	0.15	95	2.22	50	0.28	18	-3.66
Hyperoodon ampullatus	Cetacea	34	-647.58	33	-600.27	33	-528.65	33	-459.39	33	-399.65	31	-347.06	30	-292.47	29	-239.52	29	-184.32	27	-123.85	24	-68.78	18	-31.72	9	-12.66
Hystrix brachyura	Other	756	74.42	715	81.73	670	108.35	616	123.61	563	130.35	491	112.94	416	93.53	340	71.48	271	57.68	196	45.15	122	29.22	65	15.28	34	12.34
Hystrix cristata	Other	744	62.42	721	87.73	670	108.35	586	93.61	507	74.35	437	58.94	364	41.53	313	44.48	243	29.68	173	22.15	105	12.22	59	9.28	25	3.34
Ia io	Chiroptera	435	-246.58	412	-221.27	369	-192.65	325	-167.39	302	-130.65	271	-107.06	231	-91.47	193	-75.52	162	-51.32	124	-26.85	73	-19.78	36	-13.72	15	-6.66
Ictidomys tridecemlineatus	Other	938	256.42	875	241.73	766	204.35	650	157.61	558	125.35	461	82.94	408	85.53	336	67.48	259	45.68	176	25.15	105	12.22	58	8.28	21	-0.66
Indri indri	Other	496	-185.58	473	-160.27	444	-117.65	413	-79.39	380	-52.65	347	-31.06	305	-17.47	248	-20.52	213	-0.32	153	2.15	96	3.22	52	2.28	26	4.34
Inia geoffrensis	Cetacea	27	-654.58	27	-606.27	27	-534.65	27	-465.39	27	-405.65	26	-352.06	26	-296.47	25	-243.52	24	-189.32	23	-127.85	23	-69.78	20	-29.72	13	-8.66
Jaculus jaculus	Other	565	-116.58	504	-129.27	464	-97.65	427	-65.39	375	-57.65	334	-44.06	298	-24.47	257	-11.52	210	-3.32	146	-4.85	87	-5.78	50	0.28	18	-3.66
Kobus ellipsiprymnus	Other	890	208.42	827	193.73	738	176.35	653	160.61	576	143.35	490	111.94	410	87.53	342	73.48	263	49.68	190	39.15	113	20.22	67	17.28	34	12.34
Kobus leche leche	Other	883	201.42	840	206.73	758	196.35	650	157.61	556	123.35	483	104.94	413	90.53	330	61.48	264	50.68	174	23.15	111	18.22	60	10.28	33	11.34
Kogia breviceps	Cetacea	21	-660.58	21	-612.27	21	-540.65	21	-471.39	21	-411.65	21	-357.06	21	-301.47	21	-247.52	21	-192.32	21	-129.85	21	-71.78	19	-30.72	13	-8.66
Lagenorhynchus obliquidens	Cetacea	20	-661.58	20	-613.27	20	-541.65	20	-472.39	19	-413.65	19	-359.06	19	-303.47	19	-249.52	18	-195.32	17	-133.85	16	-76.78	13	-36.72	9	-12.66
Lagorchestes hirsutus	Other	926	244.42	910	276.73	814	252.35	674	181.61	562	129.35	463	84.94	387	64.53	313	44.48	238	24.68	165	14.15	110	17.22	54	4.28	21	-0.66
Lama guanicoe cacsilensis	Other	633	-48.58	602	-31.27	562	0.35	514	21.61	481	48.35	432	53.94	377	54.53	316	47.48	243	29.68	169	18.15	100	7.22	49	-0.72	29	7.34
Lasiurus borealis	Chiroptera	454	-227.58	353	-280.27	320	-241.65	288	-204.39	266	-166.65	247	-131.06	213	-109.47	179	-89.52	154	-59.32	114	-36.85	61	-31.78	28	-21.72	12	-9.66
Lemur catta	Other	678	-3.58	643	9.73	573	11.35	513	20.61	473	40.35	420	41.94	361	38.53	293	24.48	249	35.68	169	18.15	100	7.22	49	-0.72	23	1.34
Leontopithecus rosalia	Haplorrhini	352	-329.58	350	-283.27	344	-217.65	332	-160.39	316	-116.65	294	-84.06	262	-60.47	226	-42.52	186	-27.32	138	-12.85	88	-4.78	46	-3.72	22	0.34
Leopardus geoffroyi	Other	854	172.42	758	124.73	662	100.35	596	103.61	540	107.35	483	104.94	406	83.53	334	65.48	257	43.68	174	23.15	99	6.22	55	5.28	23	1.34
Leptonychotes weddellii	Pinnipedia	283	-398.58	278	-355.27	266	-295.65	253	-239.39	245	-187.65	222	-156.06	205	-117.47	179	-89.52	154	-59.32	128	-22.85	92	-0.78	48	-1.72	18	-3.66
Lepus americanus	Other	493	-188.58	467	-166.27	453	-108.65	428	-64.39	399	-33.65	352	-26.06	319	-3.47	266	-2.52	208	-5.32	148	-2.85	85	-7.78	43	-6.72	14	-7.66
Lepus timidus	Other	520	-161.58	482	-151.27	464	-97.65	442	-50.39	404	-28.65	369	-9.06	327	4.53	272	3.48	211	-2.32	150	-0.85	84	-8.78	39	-10.72	15	-6.66
Lipotes vexillifer	Cetacea	18	-663.58	18	-615.27	18	-543.65	18	-474.39	18	-414.65	18	-360.06	18	-304.47	18	-250.52	18	-195.32	16	-134.85	16	-76.78	14	-35.72	11	-10.66
Litocranius walleri	Other	803	121.42	760	126.73	688	126.35	593	100.61	520	87.35	455	76.94	385	62.53	321	52.48	252	38.68	180	29.15	120	27.22	69	19.28	31	9.34
Lontra canadensis	Other	695	13.42	672	38.73	592	30.35	520	27.61	475	42.35	429	50.94	365	42.53	303	34.48	240	26.68	172	21.15	100	7.22	51	1.28	20	-1.66
Lophiomys imhausi	Other	810	128.42	782	148.73	725	163.35	641	148.61	576	143.35	488	109.94	408	85.53	333	64.48	253	39.68	172	21.15	107	14.22	61	11.28	27	5.34
Lophocebus aterrimus	Haplorrhini	337	-344.58	331	-302.27	316	-245.65	304	-188.39	287	-145.65	272	-106.06	251	-71.47	212	-56.52	187	-26.32	136	-14.85	87	-5.78	44	-5.72	21	-0.66
Loris tardigradus	Other	647	-34.58	611	-22.27	550	-11.65	517	24.61	480	47.35	439	60.94	380	57.53	309	40.48	251	37.68	176	25.15	100	7.22	49	-0.72	20	-1.66
Loxodonta africana	Other	1984	1302.42	1774	1140.73	1253	691.35	866	373.61	677	244.35	566	187.94	469	146.53	382	113.48	308	94.68	215	64.15	130	37.22	67	17.28	29	7.34
Lutra lutra	Other	768	86.42	703	69.73	619	57.35	544	51.61	502	69.35	444	65.94	379	56.53	307	38.48	248	34.68	176	25.15	105	12.22	55	5.28	22	0.34
Lycaon pictus	Other	577	-104.58	554	-79.27	519	-42.65	485	-7.39	434	1.35	391	12.94	333	10.53	272	3.48	222	8.68	144	-6.85	79	-13.78	47	-2.72	19	-2.66
Lynx canadensis	Other	807	125.42	727	93.73	646	84.35	589	96.61	537	104.35	471	92.94	402	79.53	326	57.48	262	48.68	174	23.15	103	10.22	55	5.28	25	3.34
Lynx pardinus	Other	755	73.42	698	64.73	632	70.35	577	84.61	535	102.35	477	98.94	401	78.53	329	60.48	264	50.68	178	27.15	104	11.22	54	4.28	24	2.34
Lynx rufus	Other	843	161.42	756	122.73	657	95.35	595	102.61	540	107.35	471	92.94	403	80.53	330	61.48	253	39.68	171	20.15	93	0.22	52	2.28	22	0.34
Macaca arctoides	Haplorrhini	338	-343.58	334	-299.27	323	-238.65	310	-182.39	295	-137.65	277	-101.06	255	-67.47	214	-54.52	178	-35.32	138	-12.85	87	-5.78	50	0.28	21	-0.66
Macaca assamensis	Haplorrhini	267	-414.58	260	-373.27	251	-310.65	243	-249.39	232	-200.65	220	-158.06	206	-116.47	169	-99.52	138	-75.32	99	-51.85	64	-28.78	37	-12.72	17	-4.66
Macaca cyclopis	Haplorrhini	380	-301.58	366	-267.27	352	-209.65	335	-157.39	317	-115.65	303	-75.06	280	-42.47	237	-31.52	188	-25.32	141	-9.85	94	1.22	51	1.28	21	-0.66
Macaca fascicularis	Haplorrhini	374	-307.58	364	-269.27	349	-212.65	334	-158.39	312	-120.65	297	-81.06	267	-55.47	229	-39.52	187	-26.32	140	-10.85	92	-0.78	49	-0.72	17	-4.66
Macaca fuscata fuscata	Haplorrhini	357	-324.58	339	-294.27	329	-232.65	318	-174.39	296	-136.65	279	-99.06	253	-69.47	218	-50.52	178	-35.32	134	-16.85	84	-8.78	46	-3.72	16	-5.66
Macaca mulatta	Haplorrhini	382	-299.58	369	-264.27	353	-208.65	340	-152.39	319	-113.65	302	-76.06	267	-55.47	230	-38.52	191	-22.32	145	-5.85	96	3.22	47	-2.72	18	-3.66
Macaca nemestrina	Haplorrhini	371	-310.58	359	-274.27	346	-215.65	329	-163.39	313	-119.65	300	-78.06	267	-55.47	229	-39.52	188	-25.32	138	-12.85	90	-2.78	47	-2.72	17	-4.66
Macaca nigra	Haplorrhini	334	-347.58	328	-305.27	316	-245.65	306	-186.39	294	-138.65	279	-99.06	256	-66.47	222	-46.52	183	-30.32	132	-18.85	87	-5.78	49	-0.72	22	0.34
Macaca silenus	Haplorrhini	361	-320.58	355	-278.27	340	-221.65	325	-167.39	307	-125.65	291	-87.06	264	-58.47	224	-44.52	186	-27.32	144	-6.85	93	0.22	52	2.28	21	-0.66
Macaca thibetana thibetana	Haplorrhini	350	-331.58	340	-293.27	328	-233.65	314	-178.39	296	-136.65	284	-94.06	258	-64.47	223	-45.52	187	-26.32	134	-16.85	89	-3.78	49	-0.72	18	-3.66
Macroglossus sobrinus	Chiroptera	384	-297.58	378	-255.27	346	-215.65	321	-171.39	302	-130.65	272	-106.06	242	-80.47	216	-52.52	173	-40.32	119	-31.85	69	-23.78	39	-10.72	14	-7.66
Macropus fuliginosus	Other	958	276.42	930	296.73	811	249.35	644	151.61	525	92.35	431	52.94	361	38.53	292	23.48	224	10.68	152	1.15	98	5.22	58	8.28	26	4.34
Macropus giganteus	Other	1004	322.42	987	353.73	857	295.35	655	162.61	541	108.35	461	82.94	372	49.53	303	34.48	229	15.68	155	4.15	99	6.22	54	4.28	22	0.34
Macrotus californicus	Chiroptera	292	-389.58	285	-348.27	276	-285.65	269	-223.39	251	-181.65	238	-140.06	211	-111.47	182	-86.52	148	-65.32	113	-37.85	65	-27.78	31	-18.72	13	-8.66
Madoqua kirkii	Other	526	-155.58	488	-145.27	437	-124.65	375	-117.39	331	-101.65	289	-89.06	257	-65.47	227	-41.52	187	-26.32	135	-15.85	88	-4.78	57	7.28	27	5.34
Mandrillus leucophaeus	Haplorrhini	370	-311.58	363	-270.27	353	-208.65	334	-158.39	315	-117.65	292	-86.06	267	-55.47	223	-45.52	183	-30.32	133	-17.85	84	-8.78	46	-3.72	15	-6.66
Mandrillus sphinx	Haplorrhini	299	-382.58	292	-341.27	284	-277.65	276	-216.39	261	-171.65	251	-127.06	231	-91.47	197	-71.52	170	-43.32	125	-25.85	82	-10.78	45	-4.72	21	-0.66
Manis crassicaudata	Other	432	-249.58	432	-201.27	419	-142.65	389	-103.39	364	-68.65	328	-50.06	291	-31.47	241	-27.52	200	-13.32	148	-2.85	95	2.22	47	-2.72	26	4.34
Manis javanica	Other	853	171.42	796	162.73	658	96.35	540	47.61	467	34.35	404	25.94	332	9.53	282	13.48	231	17.68	164	13.15	101	8.22	55	5.28	24	2.34
Manis pentadactyla	Other	1091	409.42	968	334.73	770	208.35	593	100.61	514	81.35	436	57.94	360	37.53	294	25.48	235	21.68	173	22.15	113	20.22	61	11.28	29	7.34
Marmota flaviventris	Other	931	249.42	865	231.73	774	212.35	664	171.61	564	131.35	480	101.94	409	86.53	330	61.48	259	45.68	172	21.15	98	5.22	53	3.28	22	0.34
Marmota himalayana	Other	920	238.42	852	218.73	762	200.35	649	156.61	560	127.35	470	91.94	402	79.53	328	59.48	258	44.68	174	23.15	108	15.22	53	3.28	23	1.34
Marmota marmota marmota	Other	1037	355.42	957	323.73	810	248.35	691	198.61	587	154.35	488	109.94	422	99.53	343	74.48	268	54.68	186	35.15	109	16.22	63	13.28	27	5.34
Marmota monax	Other	1152	470.42	1030	396.73	872	310.35	740	247.61	620	187.35	516	137.94	441	118.53	363	94.48	282	68.68	194	43.15	118	25.22	61	11.28	25	3.34
Marmota vancouverensis	Other	867	185.42	838	204.73	746	184.35	647	154.61	546	113.35	460	81.94	401	78.53	330	61.48	259	45.68	183	32.15	110	17.22	61	11.28	29	7.34
Martes flavigula	Other	1063	381.42	924	290.73	770	208.35	671	178.61	584	151.35	510	131.94	418	95.53	347	78.48	271	57.68	177	26.15	101	8.22	49	-0.72	19	-2.66
Martes zibellina	Other	914	232.42	821	187.73	715	153.35	627	134.61	563	130.35	494	115.94	411	88.53	340	71.48	258	44.68	180	29.15	102	9.22	48	-1.72	19	-2.66
Mastomys coucha	Other	884	202.42	867	233.73	789	227.35	672	179.61	574	141.35	477	98.94	395	72.53	326	57.48	255	41.68	173	22.15	112	19.22	50	0.28	22	0.34
Mastomys natalensis	Other	540	-141.58	522	-111.27	489	-72.65	459	-33.39	410	-22.65	348	-30.06	302	-20.47	244	-24.52	201	-12.32	146	-4.85	97	4.22	57	7.28	26	4.34
Megaderma lyra	Chiroptera	273	-408.58	257	-376.27	244	-317.65	234	-258.39	227	-205.65	215	-163.06	192	-130.47	165	-103.52	138	-75.32	107	-43.85	67	-25.78	27	-22.72	16	-5.66
Megaptera novaeangliae	Cetacea	76	-605.58	76	-557.27	75	-486.65	74	-418.39	71	-361.65	69	-309.06	67	-255.47	65	-203.52	60	-153.32	53	-97.85	42	-50.78	31	-18.72	15	-6.66
Meles meles	Other	1147	465.42	957	323.73	780	218.35	670	177.61	598	165.35	516	137.94	436	113.53	358	89.48	275	61.68	189	38.15	107	14.22	53	3.28	23	1.34
Mellivora capensis	Other	716	34.42	680	46.73	606	44.35	546	53.61	501	68.35	447	68.94	377	54.53	312	43.48	244	30.68	172	21.15	101	8.22	51	1.28	20	-1.66
Meriones unguiculatus	Other	557	-124.58	546	-87.27	514	-47.65	481	-11.39	435	2.35	382	3.94	325	2.53	274	5.48	214	0.68	144	-6.85	94	1.22	49	-0.72	18	-3.66
Mesocricetus auratus	Other	985	303.42	896	262.73	807	245.35	711	218.61	598	165.35	504	125.94	423	100.53	342	73.48	269	55.68	178	27.15	112	19.22	60	10.28	25	3.34
Mesoplodon bidens	Cetacea	31	-650.58	31	-602.27	31	-530.65	31	-461.39	29	-403.65	29	-349.06	28	-294.47	28	-240.52	28	-185.32	26	-124.85	24	-68.78	16	-33.72	9	-12.66
Mesoplodon densirostris	Cetacea	36	-645.58	35	-598.27	35	-526.65	35	-457.39	34	-398.65	34	-344.06	32	-290.47	32	-236.52	31	-182.32	29	-121.85	26	-66.78	17	-32.72	9	-12.66
Microcebus griseorufus	Other	773	91.42	693	59.73	601	39.35	523	30.61	471	38.35	418	39.94	342	19.53	286	17.48	229	15.68	160	9.15	91	-1.78	47	-2.72	18	-3.66
Microcebus mittermeieri	Other	793	111.42	722	88.73	624	62.35	534	41.61	483	50.35	429	50.94	363	40.53	296	27.48	237	23.68	163	12.15	92	-0.78	48	-1.72	20	-1.66
Microcebus murinus	Other	782	100.42	729	95.73	623	61.35	549	56.61	501	68.35	438	59.94	368	45.53	305	36.48	239	25.68	163	12.15	91	-1.78	49	-0.72	17	-4.66
Microcebus ravelobensis	Other	754	72.42	718	84.73	614	52.35	534	41.61	483	50.35	431	52.94	356	33.53	296	27.48	235	21.68	164	13.15	98	5.22	47	-2.72	21	-0.66
Microcebus sp. 3 GT-2019	Other	812	130.42	744	110.73	631	69.35	540	47.61	485	52.35	429	50.94	366	43.53	307	38.48	240	26.68	165	14.15	91	-1.78	46	-3.72	19	-2.66
Microcebus tavaratra	Other	796	114.42	745	111.73	627	65.35	546	53.61	489	56.35	434	55.94	365	42.53	298	29.48	234	20.68	162	11.15	91	-1.78	46	-3.72	23	1.34
Micronycteris hirsuta	Chiroptera	507	-174.58	457	-176.27	362	-199.65	310	-182.39	279	-153.65	261	-117.06	224	-98.47	197	-71.52	167	-46.32	121	-29.85	76	-16.78	37	-12.72	20	-1.66
Microtus agrestis	Other	1110	428.42	1024	390.73	880	318.35	722	229.61	605	172.35	511	132.94	421	98.53	343	74.48	268	54.68	173	22.15	104	11.22	56	6.28	21	-0.66
Microtus arvalis	Other	976	294.42	868	234.73	769	207.35	658	165.61	546	113.35	471	92.94	393	70.53	319	50.48	247	33.68	158	7.15	96	3.22	52	2.28	18	-3.66
Microtus californicus	Other	996	314.42	899	265.73	801	239.35	693	200.61	583	150.35	489	110.94	417	94.53	337	68.48	259	45.68	171	20.15	104	11.22	57	7.28	21	-0.66
Microtus fortis	Other	929	247.42	874	240.73	780	218.35	670	177.61	562	129.35	475	96.94	400	77.53	321	52.48	256	42.68	175	24.15	103	10.22	58	8.28	17	-4.66
Microtus montanus	Other	536	-145.58	534	-99.27	518	-43.65	472	-20.39	414	-18.65	361	-17.06	307	-15.47	260	-8.52	211	-2.32	148	-2.85	91	-1.78	45	-4.72	16	-5.66
Microtus ochrogaster	Other	899	217.42	863	229.73	765	203.35	664	171.61	563	130.35	481	102.94	408	85.53	335	66.48	261	47.68	173	22.15	102	9.22	52	2.28	18	-3.66
Microtus oregoni	Other	1176	494.42	987	353.73	852	290.35	714	221.61	602	169.35	502	123.94	424	101.53	339	70.48	261	47.68	168	17.15	104	11.22	53	3.28	25	3.34
Microtus richardsoni	Other	620	-61.58	617	-16.27	593	31.35	525	32.61	455	22.35	387	8.94	335	12.53	277	8.48	214	0.68	148	-2.85	93	0.22	54	4.28	18	-3.66
Miniopterus natalensis	Chiroptera	343	-338.58	324	-309.27	307	-254.65	295	-197.39	280	-152.65	255	-123.06	217	-105.47	185	-83.52	154	-59.32	105	-45.85	60	-32.78	29	-20.72	13	-8.66
Miniopterus schreibersii	Chiroptera	302	-379.58	298	-335.27	283	-278.65	272	-220.39	264	-168.65	243	-135.06	210	-112.47	177	-91.52	149	-64.32	110	-40.85	63	-29.78	31	-18.72	12	-9.66
Miopithecus talapoin	Haplorrhini	304	-377.58	302	-331.27	297	-264.65	288	-204.39	271	-161.65	255	-123.06	236	-86.47	204	-64.52	167	-46.32	125	-25.85	83	-9.78	41	-8.72	15	-6.66
Mirounga angustirostris	Pinnipedia	256	-425.58	253	-380.27	250	-311.65	238	-254.39	229	-203.65	217	-161.06	196	-126.47	174	-94.52	152	-61.32	126	-24.85	83	-9.78	46	-3.72	24	2.34
Mirounga leonina	Pinnipedia	288	-393.58	277	-356.27	270	-291.65	256	-236.39	248	-184.65	232	-146.06	217	-105.47	194	-74.52	161	-52.32	135	-15.85	94	1.22	50	0.28	26	4.34
Mirza coquereli	Other	725	43.42	696	62.73	592	30.35	514	21.61	457	24.35	408	29.94	348	25.53	292	23.48	231	17.68	158	7.15	95	2.22	45	-4.72	16	-5.66
Mirza zaza	Other	809	127.42	748	114.73	628	66.35	547	54.61	484	51.35	437	58.94	364	41.53	307	38.48	244	30.68	163	12.15	99	6.22	46	-3.72	18	-3.66
Molossus molossus	Chiroptera	397	-284.58	359	-274.27	334	-227.65	316	-176.39	297	-135.65	276	-102.06	237	-85.47	196	-72.52	161	-52.32	120	-30.85	69	-23.78	37	-12.72	15	-6.66
Monodelphis domestica	Other	1171	489.42	1039	405.73	881	319.35	744	251.61	631	198.35	504	125.94	409	86.53	322	53.48	239	25.68	167	16.15	90	-2.78	49	-0.72	17	-4.66
Monodon monoceros	Cetacea	19	-662.58	19	-614.27	19	-542.65	19	-473.39	19	-413.65	19	-359.06	19	-303.47	19	-249.52	19	-194.32	18	-132.85	16	-76.78	14	-35.72	10	-11.66
Mormoops blainvillei	Chiroptera	257	-424.58	254	-379.27	247	-314.65	235	-257.39	217	-215.65	205	-173.06	188	-134.47	165	-103.52	142	-71.32	106	-44.85	60	-32.78	34	-15.72	12	-9.66
Moschus berezovskii	Other	1088	406.42	945	311.73	811	249.35	705	212.61	599	166.35	511	132.94	430	107.53	355	86.48	277	63.68	189	38.15	121	28.22	62	12.28	33	11.34
Moschus chrysogaster	Other	441	-240.58	425	-208.27	410	-151.65	387	-105.39	350	-82.65	314	-64.06	274	-48.47	238	-30.52	202	-11.32	140	-10.85	79	-13.78	53	3.28	22	0.34
Moschus moschiferus	Other	844	162.42	814	180.73	729	167.35	649	156.61	563	130.35	483	104.94	407	84.53	329	60.48	261	47.68	183	32.15	100	7.22	59	9.28	23	1.34
Mungos mungo	Other	980	298.42	869	235.73	704	142.35	609	116.61	556	123.35	486	107.94	409	86.53	331	62.48	262	48.68	179	28.15	101	8.22	54	4.28	24	2.34
Muntiacus crinifrons	Other	1138	456.42	1073	439.73	924	362.35	759	266.61	638	205.35	530	151.94	429	106.53	356	87.48	268	54.68	192	41.15	121	28.22	61	11.28	25	3.34
Muntiacus gongshanensis	Other	1151	469.42	1047	413.73	888	326.35	739	246.61	619	186.35	519	140.94	423	100.53	350	81.48	273	59.68	194	43.15	121	28.22	64	14.28	30	8.34
Muntiacus muntjak	Other	267	-414.58	258	-375.27	238	-323.65	213	-279.39	188	-244.65	168	-210.06	139	-183.47	119	-149.52	100	-113.32	76	-74.85	55	-37.78	30	-19.72	14	-7.66
Muntiacus reevesi	Other	1278	596.42	1127	493.73	932	370.35	779	286.61	639	206.35	533	154.94	441	118.53	351	82.48	273	59.68	189	38.15	118	25.22	63	13.28	28	6.34
Murina aurata feae	Chiroptera	468	-213.58	421	-212.27	343	-218.65	298	-194.39	271	-161.65	247	-131.06	219	-103.47	185	-83.52	150	-63.32	113	-37.85	71	-21.78	39	-10.72	12	-9.66
Mus caroli	Other	1138	456.42	1055	421.73	890	328.35	760	267.61	641	208.35	531	152.94	435	112.53	350	81.48	268	54.68	178	27.15	112	19.22	53	3.28	21	-0.66
Mus minutoides	Other	1018	336.42	939	305.73	814	252.35	706	213.61	598	165.35	486	107.94	407	84.53	332	63.48	265	51.68	180	29.15	111	18.22	53	3.28	23	1.34
Mus musculus	Other	1122	440.42	1022	388.73	872	310.35	750	257.61	634	201.35	530	151.94	440	117.53	355	86.48	274	60.68	185	34.15	117	24.22	58	8.28	26	4.34
Mus pahari	Other	1077	395.42	1021	387.73	874	312.35	750	257.61	622	189.35	516	137.94	430	107.53	348	79.48	265	51.68	180	29.15	111	18.22	56	6.28	16	-5.66
Mus spicilegus	Other	980	298.42	935	301.73	830	268.35	725	232.61	608	175.35	522	143.94	432	109.53	346	77.48	267	53.68	185	34.15	112	19.22	56	6.28	23	1.34
Mus spretus	Other	1115	433.42	1015	381.73	867	305.35	753	260.61	638	205.35	532	153.94	442	119.53	362	93.48	277	63.68	187	36.15	114	21.22	56	6.28	20	-1.66
Muscardinus avellanarius	Other	722	40.42	683	49.73	632	70.35	572	79.61	498	65.35	425	46.94	364	41.53	304	35.48	233	19.68	155	4.15	84	-8.78	44	-5.72	18	-3.66
Mustela erminea	Other	922	240.42	830	196.73	686	124.35	600	107.61	540	107.35	478	99.94	401	78.53	328	59.48	246	32.68	172	21.15	106	13.22	46	-3.72	22	0.34
Mustela nigripes	Other	769	87.42	733	99.73	639	77.35	564	71.61	517	84.35	453	74.94	382	59.53	305	36.48	235	21.68	161	10.15	89	-3.78	49	-0.72	17	-4.66
Mustela nivalis	Other	778	96.42	727	93.73	653	91.35	585	92.61	522	89.35	462	83.94	390	67.53	319	50.48	250	36.68	163	12.15	96	3.22	49	-0.72	19	-2.66
Mustela putorius furo	Other	954	272.42	841	207.73	704	142.35	616	123.61	553	120.35	480	101.94	405	82.53	328	59.48	256	42.68	174	23.15	102	9.22	51	1.28	24	2.34
Myocastor coypus	Other	622	-59.58	615	-18.27	595	33.35	546	53.61	469	36.35	402	23.94	341	18.53	292	23.48	233	19.68	173	22.15	102	9.22	57	7.28	21	-0.66
Myodes glareolus	Other	994	312.42	937	303.73	808	246.35	674	181.61	568	135.35	470	91.94	398	75.53	320	51.48	244	30.68	165	14.15	99	6.22	55	5.28	19	-2.66
Myotis brandtii	Chiroptera	454	-227.58	423	-210.27	392	-169.65	355	-137.39	324	-108.65	292	-86.06	248	-74.47	206	-62.52	171	-42.32	124	-26.85	72	-20.78	34	-15.72	15	-6.66
Myotis davidii	Chiroptera	328	-353.58	324	-309.27	313	-248.65	295	-197.39	282	-150.65	256	-122.06	220	-102.47	188	-80.52	155	-58.32	113	-37.85	65	-27.78	33	-16.72	14	-7.66
Myotis lucifugus	Chiroptera	526	-155.58	469	-164.27	402	-159.65	349	-143.39	315	-117.65	285	-93.06	242	-80.47	203	-65.52	170	-43.32	121	-29.85	70	-22.78	32	-17.72	12	-9.66
Myotis myotis	Chiroptera	456	-225.58	415	-218.27	378	-183.65	353	-139.39	328	-104.65	297	-81.06	247	-75.47	211	-57.52	172	-41.32	125	-25.85	77	-15.78	35	-14.72	11	-10.66
Myotis yumanensis	Chiroptera	522	-159.58	467	-166.27	411	-150.65	356	-136.39	326	-106.65	287	-91.06	243	-79.47	205	-63.52	167	-46.32	120	-30.85	68	-24.78	34	-15.72	14	-7.66
Myrmecobius fasciatus	Other	781	99.42	753	119.73	665	103.35	567	74.61	483	50.35	407	28.94	332	9.53	272	3.48	211	-2.32	149	-1.85	98	5.22	53	3.28	24	2.34
Myrmecophaga tridactyla	Other	1159	477.42	1079	445.73	844	282.35	684	191.61	565	132.35	466	87.94	400	77.53	340	71.48	264	50.68	194	43.15	118	25.22	62	12.28	26	4.34
Nanger dama	Other	432	-249.58	418	-215.27	387	-174.65	360	-132.39	337	-95.65	304	-74.06	271	-51.47	234	-34.52	204	-9.32	153	2.15	104	11.22	56	6.28	31	9.34
Nanger granti	Other	734	52.42	708	74.73	662	100.35	590	97.61	522	89.35	458	79.94	393	70.53	326	57.48	267	53.68	190	39.15	121	28.22	69	19.28	38	16.34
Nannospalax galili	Other	1104	422.42	1054	420.73	948	386.35	782	289.61	607	174.35	475	96.94	407	84.53	333	64.48	266	52.68	190	39.15	122	29.22	64	14.28	30	8.34
Nasalis larvatus	Haplorrhini	182	-499.58	178	-455.27	175	-386.65	175	-317.39	173	-259.65	165	-213.06	156	-166.47	143	-125.52	119	-94.32	102	-48.85	64	-28.78	39	-10.72	18	-3.66
Neodon shergylaensis	Other	941	259.42	892	258.73	774	212.35	664	171.61	564	131.35	478	99.94	400	77.53	326	57.48	254	40.68	168	17.15	103	10.22	58	8.28	20	-1.66
Neofelis diardi	Other	750	68.42	711	77.73	641	79.35	572	79.61	531	98.35	474	95.94	408	85.53	342	73.48	261	47.68	178	27.15	96	3.22	56	6.28	26	4.34
Neofelis nebulosa	Other	844	162.42	757	123.73	653	91.35	590	97.61	542	109.35	481	102.94	408	85.53	342	73.48	262	48.68	177	26.15	99	6.22	57	7.28	18	-3.66
Neogale vison	Other	916	234.42	829	195.73	699	137.35	606	113.61	544	111.35	484	105.94	401	78.53	321	52.48	255	41.68	174	23.15	95	2.22	48	-1.72	18	-3.66
Neomonachus schauinslandi	Pinnipedia	312	-369.58	295	-338.27	287	-274.65	271	-221.39	262	-170.65	246	-132.06	217	-105.47	196	-72.52	167	-46.32	134	-16.85	89	-3.78	51	1.28	24	2.34
Neophocaena asiaeorientalis asiaeorientalis	Cetacea	20	-661.58	20	-613.27	19	-542.65	19	-473.39	18	-414.65	18	-360.06	18	-304.47	18	-250.52	18	-195.32	17	-133.85	16	-76.78	9	-40.72	7	-14.66
Neotoma lepida	Other	607	-74.58	593	-40.27	563	1.35	521	28.61	473	40.35	408	29.94	353	30.53	293	24.48	238	24.68	162	11.15	100	7.22	53	3.28	21	-0.66
Neotragus moschatus	Other	574	-107.58	561	-72.27	515	-46.65	465	-27.39	414	-18.65	376	-2.06	321	-1.47	273	4.48	227	13.68	167	16.15	108	15.22	58	8.28	32	10.34
Neotragus pygmaeus	Other	658	-23.58	625	-8.27	596	34.35	533	40.61	488	55.35	437	58.94	379	56.53	315	46.48	257	43.68	175	24.15	119	26.22	62	12.28	39	17.34
Nesogale talazaci	Other	1019	337.42	945	311.73	809	247.35	690	197.61	582	149.35	508	129.94	425	102.53	339	70.48	258	44.68	177	26.15	103	10.22	54	4.28	20	-1.66
Noctilio leporinus	Chiroptera	369	-312.58	339	-294.27	306	-255.65	278	-214.39	257	-175.65	243	-135.06	216	-106.47	188	-80.52	156	-57.32	117	-33.85	64	-28.78	41	-8.72	16	-5.66
Nomascus leucogenys	Haplorrhini	264	-417.58	256	-377.27	241	-320.65	231	-261.39	217	-215.65	202	-176.06	192	-130.47	170	-98.52	147	-66.32	110	-40.85	76	-16.78	40	-9.72	18	-3.66
Nomascus siki	Haplorrhini	229	-452.58	223	-410.27	218	-343.65	210	-282.39	199	-233.65	185	-193.06	174	-148.47	155	-113.52	136	-77.32	106	-44.85	78	-14.78	46	-3.72	24	2.34
Notamacropus eugenii	Other	1369	687.42	1248	614.73	1042	480.35	782	289.61	617	184.35	504	125.94	418	95.53	339	70.48	254	40.68	177	26.15	104	11.22	61	11.28	25	3.34
Nyctereutes procyonoides	Other	816	134.42	710	76.73	628	66.35	566	73.61	499	66.35	453	74.94	376	53.53	307	38.48	235	21.68	160	9.15	88	-4.78	44	-5.72	20	-1.66
Nycticebus bengalensis	Other	627	-54.58	603	-30.27	541	-20.65	499	6.61	465	32.35	422	43.94	357	34.53	302	33.48	243	29.68	176	25.15	102	9.22	48	-1.72	23	1.34
Nycticebus coucang	Other	768	86.42	695	61.73	604	42.35	545	52.61	505	72.35	458	79.94	385	62.53	319	50.48	258	44.68	182	31.15	106	13.22	48	-1.72	19	-2.66
Nycticeius humeralis	Chiroptera	371	-310.58	342	-291.27	313	-248.65	287	-205.39	265	-167.65	238	-140.06	203	-119.47	177	-91.52	141	-72.32	109	-41.85	62	-30.78	32	-17.72	10	-11.66
Ochotona curzoniae	Other	749	67.42	653	19.73	598	36.35	545	52.61	494	61.35	434	55.94	374	51.53	319	50.48	247	33.68	167	16.15	96	3.22	51	1.28	18	-3.66
Ochotona princeps	Other	525	-156.58	501	-132.27	482	-79.65	457	-35.39	426	-6.65	383	4.94	334	11.53	282	13.48	220	6.68	149	-1.85	85	-7.78	47	-2.72	17	-4.66
Octodon degus	Other	712	30.42	683	49.73	628	66.35	560	67.61	487	54.35	438	59.94	370	47.53	315	46.48	248	34.68	169	18.15	104	11.22	56	6.28	21	-0.66
Octomys mimax	Other	372	-309.58	371	-262.27	370	-191.65	365	-127.39	333	-99.65	307	-71.06	274	-48.47	239	-29.52	190	-23.32	132	-18.85	88	-4.78	46	-3.72	16	-5.66
Odobenus rosmarus divergens	Pinnipedia	407	-274.58	393	-240.27	364	-197.65	345	-147.39	315	-117.65	294	-84.06	267	-55.47	239	-29.52	195	-18.32	146	-4.85	94	1.22	52	2.28	26	4.34
Odocoileus hemionus	Other	957	275.42	893	259.73	779	217.35	670	177.61	573	140.35	503	124.94	414	91.53	343	74.48	262	48.68	189	38.15	111	18.22	63	13.28	33	11.34
Odocoileus virginianus texanus	Other	919	237.42	867	233.73	783	221.35	682	189.61	585	152.35	498	119.94	400	77.53	335	66.48	262	48.68	183	32.15	111	18.22	58	8.28	26	4.34
Okapia johnstoni	Other	665	-16.58	645	11.73	592	30.35	523	30.61	473	40.35	417	38.94	342	19.53	287	18.48	232	18.68	170	19.15	103	10.22	55	5.28	22	0.34
Ondatra zibethicus	Other	750	68.42	721	87.73	650	88.35	566	73.61	490	57.35	415	36.94	362	39.53	298	29.48	242	28.68	169	18.15	104	11.22	56	6.28	19	-2.66
Onychomys torridus	Other	949	267.42	839	205.73	746	184.35	670	177.61	593	160.35	494	115.94	414	91.53	336	67.48	257	43.68	176	25.15	112	19.22	59	9.28	21	-0.66
Orcinus orca	Cetacea	19	-662.58	19	-614.27	19	-542.65	19	-473.39	19	-413.65	18	-360.06	18	-304.47	18	-250.52	18	-195.32	17	-133.85	17	-75.78	14	-35.72	12	-9.66
Oreamnos americanus	Other	607	-74.58	606	-27.27	570	8.35	515	22.61	461	28.35	402	23.94	355	32.53	286	17.48	230	16.68	158	7.15	93	0.22	54	4.28	25	3.34
Oreotragus oreotragus	Other	793	111.42	722	88.73	666	104.35	595	102.61	523	90.35	469	90.94	398	75.53	325	56.48	259	45.68	185	34.15	110	17.22	57	7.28	33	11.34
Orientallactaga bullata	Other	515	-166.58	496	-137.27	466	-95.65	430	-62.39	379	-53.65	338	-40.06	298	-24.47	257	-11.52	207	-6.32	143	-7.85	85	-7.78	44	-5.72	19	-2.66
Ornithorhynchus anatinus	Other	333	-348.58	317	-316.27	294	-267.65	273	-219.39	251	-181.65	230	-148.06	209	-113.47	183	-85.52	142	-71.32	100	-50.85	64	-28.78	33	-16.72	12	-9.66
Orycteropus afer afer	Other	1023	341.42	986	352.73	861	299.35	690	197.61	566	133.35	472	93.94	400	77.53	331	62.48	267	53.68	190	39.15	105	12.22	56	6.28	28	6.34
Oryctolagus cuniculus	Other	843	161.42	711	77.73	637	75.35	582	89.61	513	80.35	463	84.94	400	77.53	326	57.48	257	43.68	172	21.15	106	13.22	53	3.28	15	-6.66
Oryx dammah	Other	815	133.42	776	142.73	708	146.35	616	123.61	547	114.35	471	92.94	396	73.53	330	61.48	255	41.68	181	30.15	103	10.22	57	7.28	25	3.34
Oryx gazella	Other	789	107.42	748	114.73	683	121.35	594	101.61	522	89.35	456	77.94	388	65.53	312	43.48	251	37.68	171	20.15	110	17.22	67	17.28	27	5.34
Otocolobus manul	Other	735	53.42	687	53.73	611	49.35	555	62.61	507	74.35	457	78.94	392	69.53	326	57.48	253	39.68	177	26.15	103	10.22	58	8.28	31	9.34
Otocyon megalotis megalotis	Other	755	73.42	685	51.73	613	51.35	554	61.61	493	60.35	439	60.94	371	48.53	301	32.48	238	24.68	162	11.15	91	-1.78	49	-0.72	21	-0.66
Otolemur garnettii	Other	747	65.42	706	72.73	613	51.35	557	64.61	512	79.35	459	80.94	390	67.53	324	55.48	260	46.68	172	21.15	98	5.22	47	-2.72	19	-2.66
Ourebia ourebi	Other	183	-498.58	183	-450.27	183	-378.65	182	-310.39	176	-256.65	162	-216.06	152	-170.47	130	-138.52	114	-99.32	87	-63.85	55	-37.78	33	-16.72	16	-5.66
Ovibos moschatus	Other	844	162.42	806	172.73	730	168.35	631	138.61	550	117.35	479	100.94	401	78.53	326	57.48	258	44.68	182	31.15	96	3.22	54	4.28	24	2.34
Ovis ammon polii x Ovis aries	Other	918	236.42	851	217.73	751	189.35	638	145.61	549	116.35	485	106.94	418	95.53	338	69.48	264	50.68	182	31.15	113	20.22	53	3.28	21	-0.66
Ovis aries	Other	890	208.42	824	190.73	731	169.35	622	129.61	538	105.35	473	94.94	405	82.53	333	64.48	263	49.68	186	35.15	113	20.22	58	8.28	22	0.34
Ovis canadensis	Other	756	74.42	733	99.73	667	105.35	570	77.61	507	74.35	446	67.94	386	63.53	318	49.48	252	38.68	174	23.15	110	17.22	58	8.28	24	2.34
Ovis nivicola lydekkeri	Other	620	-61.58	619	-14.27	583	21.35	527	34.61	459	26.35	407	28.94	363	40.53	302	33.48	237	23.68	171	20.15	118	25.22	65	15.28	31	9.34
Ovis orientalis	Other	955	273.42	855	221.73	756	194.35	645	152.61	553	120.35	491	112.94	424	101.53	339	70.48	269	55.68	177	26.15	114	21.22	52	2.28	21	-0.66
Pan paniscus	Haplorrhini	402	-279.58	390	-243.27	366	-195.65	352	-140.39	335	-97.65	312	-66.06	285	-37.47	249	-19.52	209	-4.32	147	-3.85	101	8.22	51	1.28	23	1.34
Pan troglodytes	Haplorrhini	402	-279.58	393	-240.27	370	-191.65	347	-145.39	334	-98.65	314	-64.06	285	-37.47	251	-17.52	202	-11.32	149	-1.85	102	9.22	50	0.28	22	0.34
Panthera leo	Other	856	174.42	753	119.73	660	98.35	595	102.61	541	108.35	486	107.94	409	86.53	337	68.48	262	48.68	176	25.15	95	2.22	59	9.28	27	5.34
Panthera onca	Other	606	-75.58	596	-37.27	553	-8.65	517	24.61	480	47.35	431	52.94	370	47.53	309	40.48	245	31.68	167	16.15	96	3.22	62	12.28	25	3.34
Panthera pardus	Other	907	225.42	784	150.73	680	118.35	614	121.61	562	129.35	495	116.94	423	100.53	344	75.48	266	52.68	177	26.15	99	6.22	60	10.28	25	3.34
Panthera tigris	Other	896	214.42	786	152.73	681	119.35	612	119.61	565	132.35	499	120.94	429	106.53	353	84.48	278	64.68	182	31.15	107	14.22	62	12.28	29	7.34
Panthera uncia	Other	686	4.42	653	19.73	596	34.35	546	53.61	510	77.35	452	73.94	386	63.53	321	52.48	257	43.68	169	18.15	98	5.22	57	7.28	22	0.34
Papio anubis	Haplorrhini	361	-320.58	353	-280.27	343	-218.65	328	-164.39	307	-125.65	290	-88.06	264	-58.47	229	-39.52	187	-26.32	132	-18.85	87	-5.78	48	-1.72	17	-4.66
Papio hamadryas	Haplorrhini	301	-380.58	294	-339.27	284	-277.65	273	-219.39	251	-181.65	239	-139.06	225	-97.47	190	-78.52	155	-58.32	115	-35.85	75	-17.78	45	-4.72	17	-4.66
Papio papio	Haplorrhini	325	-356.58	322	-311.27	313	-248.65	300	-192.39	282	-150.65	267	-111.06	246	-76.47	211	-57.52	178	-35.32	128	-22.85	82	-10.78	43	-6.72	17	-4.66
Paradoxurus hermaphroditus	Other	923	241.42	845	211.73	711	149.35	614	121.61	551	118.35	491	112.94	414	91.53	336	67.48	267	53.68	172	21.15	101	8.22	49	-0.72	18	-3.66
Pedetes capensis	Other	666	-15.58	636	2.73	565	3.35	495	2.61	437	4.35	383	4.94	337	14.53	285	16.48	223	9.68	155	4.15	95	2.22	50	0.28	23	1.34
Perognathus longimembris pacificus	Other	821	139.42	744	110.73	671	109.35	587	94.61	497	64.35	418	39.94	349	26.53	292	23.48	238	24.68	165	14.15	103	10.22	53	3.28	26	4.34
Peromyscus attwateri	Other	871	189.42	808	174.73	722	160.35	656	163.61	561	128.35	473	94.94	400	77.53	310	41.48	244	30.68	165	14.15	102	9.22	49	-0.72	19	-2.66
Peromyscus aztecus	Other	857	175.42	791	157.73	708	146.35	648	155.61	564	131.35	479	100.94	396	73.53	321	52.48	253	39.68	166	15.15	105	12.22	49	-0.72	17	-4.66
Peromyscus californicus insignis	Other	1022	340.42	924	290.73	805	243.35	710	217.61	607	174.35	509	130.94	430	107.53	341	72.48	264	50.68	183	32.15	109	16.22	62	12.28	24	2.34
Peromyscus eremicus	Other	968	286.42	877	243.73	786	224.35	691	198.61	594	161.35	508	129.94	420	97.53	339	70.48	257	43.68	179	28.15	112	19.22	63	13.28	24	2.34
Peromyscus leucopus	Other	1034	352.42	890	256.73	756	194.35	679	186.61	581	148.35	486	107.94	407	84.53	321	52.48	252	38.68	174	23.15	102	9.22	51	1.28	19	-2.66
Peromyscus maniculatus bairdii	Other	967	285.42	879	245.73	786	224.35	699	206.61	602	169.35	512	133.94	420	97.53	337	68.48	258	44.68	176	25.15	110	17.22	60	10.28	22	0.34
Peromyscus melanophrys	Other	847	165.42	780	146.73	704	142.35	639	146.61	556	123.35	477	98.94	398	75.53	322	53.48	255	41.68	177	26.15	111	18.22	56	6.28	24	2.34
Peromyscus nudipes	Other	882	200.42	811	177.73	723	161.35	654	161.61	569	136.35	484	105.94	405	82.53	324	55.48	254	40.68	173	22.15	107	14.22	51	1.28	19	-2.66
Peromyscus polionotus subgriseus	Other	948	266.42	888	254.73	775	213.35	695	202.61	603	170.35	504	125.94	423	100.53	334	65.48	266	52.68	183	32.15	110	17.22	54	4.28	19	-2.66
Petromus typicus	Other	562	-119.58	542	-91.27	520	-41.65	489	-3.39	441	8.35	406	27.94	346	23.53	296	27.48	226	12.68	156	5.15	100	7.22	56	6.28	22	0.34
Phacochoerus africanus	Other	1136	454.42	964	330.73	824	262.35	706	213.61	634	201.35	556	177.94	464	141.53	377	108.48	301	87.68	214	63.15	134	41.22	65	15.28	29	7.34
Phalanger gymnotis	Other	1046	364.42	1004	370.73	831	269.35	657	164.61	571	138.35	476	97.94	381	58.53	305	36.48	229	15.68	154	3.15	103	10.22	54	4.28	24	2.34
Phascolarctos cinereus	Other	636	-45.58	610	-23.27	570	8.35	516	23.61	467	34.35	397	18.94	339	16.53	282	13.48	224	10.68	154	3.15	92	-0.78	53	3.28	24	2.34
Phataginus tricuspis	Other	593	-88.58	557	-76.27	482	-79.65	426	-66.39	390	-42.65	341	-37.06	290	-32.47	249	-19.52	202	-11.32	154	3.15	99	6.22	55	5.28	27	5.34
Philantomba maxwellii	Other	437	-244.58	403	-230.27	382	-179.65	362	-130.39	340	-92.65	310	-68.06	276	-46.47	243	-25.52	208	-5.32	155	4.15	102	9.22	65	15.28	36	14.34
Phoca vitulina	Pinnipedia	340	-341.58	326	-307.27	318	-243.65	302	-190.39	292	-140.65	273	-105.06	242	-80.47	212	-56.52	169	-44.32	137	-13.85	93	0.22	54	4.28	26	4.34
Phocoena phocoena	Cetacea	21	-660.58	21	-612.27	21	-540.65	21	-471.39	20	-412.65	20	-358.06	20	-302.47	20	-248.52	20	-193.32	19	-131.85	18	-74.78	11	-38.72	7	-14.66
Phocoena sinus	Cetacea	22	-659.58	22	-611.27	21	-540.65	20	-472.39	19	-413.65	19	-359.06	19	-303.47	19	-249.52	19	-194.32	18	-132.85	16	-76.78	12	-37.72	8	-13.66
Phodopus roborovskii	Other	764	82.42	703	69.73	642	80.35	585	92.61	513	80.35	441	62.94	385	62.53	330	61.48	252	38.68	166	15.15	102	9.22	52	2.28	20	-1.66
Phodopus sungorus	Other	650	-31.58	644	10.73	613	51.35	568	75.61	494	61.35	425	46.94	353	30.53	309	40.48	240	26.68	165	14.15	105	12.22	55	5.28	25	3.34
Phyllostomus discolor	Chiroptera	667	-14.58	568	-65.27	439	-122.65	374	-118.39	333	-99.65	303	-75.06	262	-60.47	224	-44.52	180	-33.32	127	-23.85	79	-13.78	40	-9.72	18	-3.66
Phyllostomus hastatus	Chiroptera	524	-157.58	488	-145.27	417	-144.65	358	-134.39	318	-114.65	285	-93.06	250	-72.47	212	-56.52	179	-34.32	130	-20.85	78	-14.78	41	-8.72	17	-4.66
Piliocolobus tephrosceles	Haplorrhini	220	-461.58	215	-418.27	211	-350.65	206	-286.39	199	-233.65	190	-188.06	184	-138.47	166	-102.52	136	-77.32	110	-40.85	75	-17.78	42	-7.72	16	-5.66
Pipistrellus kuhlii	Chiroptera	437	-244.58	407	-226.27	368	-193.65	336	-156.39	315	-117.65	276	-102.06	235	-87.47	196	-72.52	156	-57.32	118	-32.85	64	-28.78	29	-20.72	13	-8.66
Pipistrellus pipistrellus	Chiroptera	482	-199.58	443	-190.27	387	-174.65	345	-147.39	311	-121.65	279	-99.06	236	-86.47	198	-70.52	161	-52.32	115	-35.85	65	-27.78	32	-17.72	12	-9.66
Pithecia pithecia	Haplorrhini	314	-367.58	309	-324.27	301	-260.65	295	-197.39	281	-151.65	267	-111.06	240	-82.47	218	-50.52	180	-33.32	132	-18.85	81	-11.78	45	-4.72	22	0.34
Platanista gangetica	Cetacea	19	-662.58	19	-614.27	19	-542.65	19	-473.39	19	-413.65	18	-360.06	18	-304.47	18	-250.52	18	-195.32	17	-133.85	17	-75.78	13	-36.72	8	-13.66
Platanista minor	Cetacea	25	-656.58	25	-608.27	25	-536.65	25	-467.39	24	-408.65	23	-355.06	22	-300.47	22	-246.52	22	-191.32	21	-129.85	19	-73.78	15	-34.72	12	-9.66
Plecturocebus donacophilus	Haplorrhini	271	-410.58	271	-362.27	263	-298.65	259	-233.39	244	-188.65	233	-145.06	218	-104.47	189	-79.52	164	-49.32	119	-31.85	82	-10.78	44	-5.72	26	4.34
Pongo abelii	Haplorrhini	301	-380.58	296	-337.27	275	-286.65	261	-231.39	247	-185.65	230	-148.06	211	-111.47	190	-78.52	163	-50.32	119	-31.85	81	-11.78	44	-5.72	19	-2.66
Pongo pygmaeus	Haplorrhini	337	-344.58	324	-309.27	300	-261.65	287	-205.39	272	-160.65	255	-123.06	229	-93.47	199	-69.52	169	-44.32	125	-25.85	79	-13.78	41	-8.72	19	-2.66
Pontoporia blainvillei	Cetacea	20	-661.58	20	-613.27	20	-541.65	20	-472.39	19	-413.65	19	-359.06	18	-304.47	18	-250.52	18	-195.32	17	-133.85	16	-76.78	13	-36.72	11	-10.66
Potos flavus	Other	624	-57.58	620	-13.27	594	32.35	540	47.61	493	60.35	435	56.94	372	49.53	318	49.48	250	36.68	172	21.15	97	4.22	47	-2.72	18	-3.66
Praomys delectorum	Other	912	230.42	861	227.73	757	195.35	669	176.61	573	140.35	478	99.94	403	80.53	325	56.48	246	32.68	170	19.15	101	8.22	53	3.28	22	0.34
Prionailurus bengalensis	Other	859	177.42	778	144.73	665	103.35	598	105.61	548	115.35	494	115.94	414	91.53	345	76.48	268	54.68	185	34.15	105	12.22	62	12.28	31	9.34
Prionailurus iriomotensis	Other	649	-32.58	635	1.73	590	28.35	543	50.61	501	68.35	450	71.94	381	58.53	319	50.48	254	40.68	176	25.15	104	11.22	59	9.28	26	4.34
Prionailurus viverrinus	Other	863	181.42	766	132.73	674	112.35	601	108.61	556	123.35	500	121.94	417	94.53	340	71.48	268	54.68	183	32.15	105	12.22	63	13.28	28	6.34
Procapra przewalskii	Other	499	-182.58	499	-134.27	486	-75.65	453	-39.39	404	-28.65	352	-26.06	303	-19.47	266	-2.52	215	1.68	146	-4.85	87	-5.78	45	-4.72	24	2.34
Procavia capensis	Other	762	80.42	744	110.73	703	141.35	618	125.61	516	83.35	436	57.94	375	52.53	312	43.48	245	31.68	167	16.15	107	14.22	59	9.28	28	6.34
Procyon lotor	Other	590	-91.58	571	-62.27	544	-17.65	501	8.61	455	22.35	410	31.94	355	32.53	303	34.48	231	17.68	160	9.15	99	6.22	44	-5.72	17	-4.66
Prolemur simus	Other	573	-108.58	555	-78.27	503	-58.65	471	-21.39	442	9.35	402	23.94	344	21.53	285	16.48	237	23.68	158	7.15	92	-0.78	48	-1.72	17	-4.66
Propithecus coquereli	Other	608	-73.58	587	-46.27	543	-18.65	506	13.61	464	31.35	416	37.94	354	31.53	287	18.48	237	23.68	157	6.15	93	0.22	42	-7.72	21	-0.66
Proteles cristata cristata	Other	845	163.42	748	114.73	670	108.35	613	120.61	553	120.35	498	119.94	416	93.53	340	71.48	267	53.68	185	34.15	101	8.22	53	3.28	19	-2.66
Psammomys obesus	Other	584	-97.58	553	-80.27	510	-51.65	473	-19.39	436	3.35	386	7.94	333	10.53	284	15.48	217	3.68	158	7.15	100	7.22	57	7.28	25	3.34
Pseudocheirus occidentalis	Other	793	111.42	780	146.73	704	142.35	607	114.61	516	83.35	437	58.94	352	29.53	281	12.48	219	5.68	151	0.15	96	3.22	48	-1.72	21	-0.66
Pseudochirops corinnae	Other	779	97.42	768	134.73	699	137.35	581	88.61	491	58.35	408	29.94	328	5.53	266	-2.52	205	-8.32	138	-12.85	88	-4.78	49	-0.72	25	3.34
Pseudochirops cupreus	Other	824	142.42	807	173.73	715	153.35	586	93.61	505	72.35	422	43.94	342	19.53	282	13.48	211	-2.32	150	-0.85	101	8.22	51	1.28	23	1.34
Pseudois nayaur	Other	741	59.42	713	79.73	660	98.35	588	95.61	522	89.35	447	68.94	387	64.53	314	45.48	247	33.68	173	22.15	103	10.22	56	6.28	25	3.34
Pteronotus parnellii mesoamericanus	Chiroptera	409	-272.58	383	-250.27	352	-209.65	332	-160.39	305	-127.65	283	-95.06	251	-71.47	215	-53.52	168	-45.32	120	-30.85	72	-20.78	36	-13.72	18	-3.66
Pteronura brasiliensis	Other	599	-82.58	587	-46.27	524	-37.65	478	-14.39	439	6.35	391	12.94	344	21.53	286	17.48	226	12.68	165	14.15	101	8.22	46	-3.72	21	-0.66
Pteropus alecto	Chiroptera	406	-275.58	391	-242.27	372	-189.65	358	-134.39	334	-98.65	305	-73.06	266	-56.47	231	-37.52	182	-31.32	133	-17.85	80	-12.78	44	-5.72	21	-0.66
Pteropus giganteus	Chiroptera	670	-11.58	572	-61.27	467	-94.65	419	-73.39	382	-50.65	336	-42.06	298	-24.47	252	-16.52	195	-18.32	143	-7.85	79	-13.78	45	-4.72	21	-0.66
Pteropus pselaphon	Chiroptera	507	-174.58	478	-155.27	420	-141.65	376	-116.39	347	-85.65	307	-71.06	273	-49.47	232	-36.52	188	-25.32	136	-14.85	74	-18.78	41	-8.72	20	-1.66
Pteropus vampyrus	Chiroptera	463	-218.58	442	-191.27	409	-152.65	378	-114.39	350	-82.65	318	-60.06	274	-48.47	234	-34.52	188	-25.32	135	-15.85	79	-13.78	36	-13.72	19	-2.66
Puma concolor	Other	613	-68.58	611	-22.27	572	10.35	530	37.61	485	52.35	430	51.94	370	47.53	308	39.48	242	28.68	166	15.15	100	7.22	52	2.28	22	0.34
Puma yagouaroundi	Other	681	-0.58	647	13.73	599	37.35	553	60.61	504	71.35	456	77.94	389	66.53	320	51.48	247	33.68	175	24.15	95	2.22	47	-2.72	18	-3.66
Pusa hispida saimensis	Pinnipedia	410	-271.58	376	-257.27	353	-208.65	332	-160.39	316	-116.65	293	-85.06	260	-62.47	232	-36.52	190	-23.32	142	-8.85	95	2.22	45	-4.72	24	2.34
Pusa sibirica	Pinnipedia	332	-349.58	330	-303.27	324	-237.65	310	-182.39	296	-136.65	277	-101.06	251	-71.47	222	-46.52	179	-34.32	141	-9.85	92	-0.78	51	1.28	24	2.34
Pygathrix nemaeus	Haplorrhini	213	-468.58	212	-421.27	205	-356.65	201	-291.39	196	-236.65	188	-190.06	178	-144.47	162	-106.52	139	-74.32	107	-43.85	77	-15.78	45	-4.72	23	1.34
Pygathrix nigripes	Haplorrhini	202	-479.58	202	-431.27	192	-369.65	190	-302.39	185	-247.65	177	-201.06	166	-156.47	151	-117.52	129	-84.32	106	-44.85	77	-15.78	43	-6.72	23	1.34
Raphicerus campestris	Other	626	-55.58	554	-79.27	523	-38.65	462	-30.39	411	-21.65	352	-26.06	298	-24.47	260	-8.52	211	-2.32	158	7.15	96	3.22	50	0.28	24	2.34
Rattus norvegicus	Other	1298	616.42	1150	516.73	943	381.35	792	299.61	658	225.35	548	169.94	450	127.53	358	89.48	274	60.68	183	32.15	122	29.22	63	13.28	27	5.34
Rattus rattus	Other	1194	512.42	1126	492.73	933	371.35	787	294.61	654	221.35	527	148.94	428	105.53	343	74.48	266	52.68	183	32.15	113	20.22	57	7.28	23	1.34
Redunca redunca	Other	808	126.42	787	153.73	720	158.35	625	132.61	545	112.35	467	88.94	398	75.53	333	64.48	263	49.68	173	22.15	103	10.22	57	7.28	30	8.34
Rhabdomys dilectus	Other	1000	318.42	924	290.73	825	263.35	728	235.61	624	191.35	521	142.94	436	113.53	349	80.48	263	49.68	179	28.15	110	17.22	51	1.28	14	-7.66
Rhinoceros unicornis	Other	1089	407.42	1061	427.73	898	336.35	691	198.61	581	148.35	502	123.94	425	102.53	351	82.48	275	61.68	197	46.15	132	39.22	71	21.28	34	12.34
Rhinolophus ferrumequinum	Chiroptera	392	-289.58	342	-291.27	299	-262.65	286	-206.39	270	-162.65	253	-125.06	226	-96.47	199	-69.52	163	-50.32	119	-31.85	74	-18.78	36	-13.72	17	-4.66
Rhinopithecus bieti	Haplorrhini	206	-475.58	206	-427.27	201	-360.65	201	-291.39	193	-239.65	185	-193.06	175	-147.47	159	-109.52	136	-77.32	110	-40.85	76	-16.78	44	-5.72	20	-1.66
Rhinopithecus roxellana	Haplorrhini	230	-451.58	227	-406.27	219	-342.65	216	-276.39	209	-223.65	195	-183.06	186	-136.47	165	-103.52	144	-69.32	119	-31.85	79	-13.78	48	-1.72	22	0.34
Rhinopithecus strykeri	Haplorrhini	230	-451.58	230	-403.27	222	-339.65	220	-272.39	213	-219.65	200	-178.06	189	-133.47	174	-94.52	144	-69.32	116	-34.85	77	-15.78	48	-1.72	20	-1.66
Rhizomys pruinosus	Other	1204	522.42	1103	469.73	933	371.35	789	296.61	630	197.35	503	124.94	411	88.53	333	64.48	266	52.68	184	33.15	122	29.22	67	17.28	27	5.34
Rhombomys opimus	Other	601	-80.58	567	-66.27	528	-33.65	496	3.61	454	21.35	398	19.94	340	17.53	300	31.48	229	15.68	164	13.15	103	10.22	52	2.28	22	0.34
Rhynchomys soricoides	Other	824	142.42	780	146.73	711	149.35	627	134.61	544	111.35	464	85.94	394	71.53	316	47.48	252	38.68	175	24.15	104	11.22	58	8.28	22	0.34
Rousettus aegyptiacus	Chiroptera	437	-244.58	390	-243.27	370	-191.65	352	-140.39	330	-102.65	303	-75.06	262	-60.47	223	-45.52	171	-42.32	120	-30.85	71	-21.78	41	-8.72	20	-1.66
Rousettus leschenaultii	Chiroptera	679	-2.58	594	-39.27	493	-68.65	420	-72.39	375	-57.65	338	-40.06	297	-25.47	249	-19.52	190	-23.32	135	-15.85	78	-14.78	36	-13.72	20	-1.66
Rousettus madagascariensis	Chiroptera	438	-243.58	429	-204.27	397	-164.65	354	-138.39	323	-109.65	291	-87.06	253	-69.47	225	-43.52	176	-37.32	126	-24.85	71	-21.78	41	-8.72	16	-5.66
Saguinus imperator	Haplorrhini	354	-327.58	350	-283.27	333	-228.65	320	-172.39	308	-124.65	287	-91.06	255	-67.47	218	-50.52	184	-29.32	128	-22.85	87	-5.78	46	-3.72	20	-1.66
Saguinus midas	Haplorrhini	281	-400.58	274	-359.27	262	-299.65	251	-241.39	241	-191.65	225	-153.06	200	-122.47	164	-104.52	140	-73.32	99	-51.85	70	-22.78	39	-10.72	16	-5.66
Saiga tatarica	Other	418	-263.58	410	-223.27	399	-162.65	369	-123.39	347	-85.65	310	-68.06	264	-58.47	228	-40.52	187	-26.32	135	-15.85	91	-1.78	46	-3.72	22	0.34
Saimiri boliviensis boliviensis	Haplorrhini	284	-397.58	282	-351.27	275	-286.65	264	-228.39	253	-179.65	244	-134.06	223	-99.47	198	-70.52	162	-51.32	122	-28.85	75	-17.78	33	-16.72	14	-7.66
Sapajus apella	Haplorrhini	406	-275.58	401	-232.27	386	-175.65	368	-124.39	347	-85.65	324	-54.06	293	-29.47	245	-23.52	201	-12.32	139	-11.85	85	-7.78	45	-4.72	19	-2.66
Sarcophilus harrisii	Other	1029	347.42	965	331.73	842	280.35	704	211.61	585	152.35	475	96.94	386	63.53	302	33.48	225	11.68	154	3.15	96	3.22	50	0.28	23	1.34
Scalopus aquaticus	Other	1137	455.42	1058	424.73	887	325.35	643	150.61	492	59.35	410	31.94	344	21.53	287	18.48	229	15.68	159	8.15	100	7.22	55	5.28	22	0.34
Sciurus carolinensis	Other	1390	708.42	1101	467.73	882	320.35	755	262.61	636	203.35	527	148.94	438	115.53	362	93.48	276	62.68	192	41.15	109	16.22	54	4.28	28	6.34
Sciurus niger	Other	1618	936.42	1260	626.73	966	404.35	791	298.61	669	236.35	561	182.94	458	135.53	373	104.48	279	65.68	202	51.15	130	37.22	60	10.28	28	6.34
Sciurus vulgaris	Other	1178	496.42	1032	398.73	856	294.35	736	243.61	618	185.35	505	126.94	430	107.53	359	90.48	272	58.68	194	43.15	116	23.22	59	9.28	29	7.34
Semnopithecus entellus	Haplorrhini	186	-495.58	186	-447.27	183	-378.65	179	-313.39	170	-262.65	162	-216.06	153	-169.47	144	-124.52	119	-94.32	95	-55.85	62	-30.78	41	-8.72	17	-4.66
Sigmodon hispidus	Other	1050	368.42	967	333.73	820	258.35	717	224.61	630	197.35	514	135.94	419	96.53	347	78.48	262	48.68	177	26.15	113	20.22	56	6.28	21	-0.66
Solenodon paradoxus	Other	942	260.42	870	236.73	732	170.35	615	122.61	535	102.35	474	95.94	395	72.53	324	55.48	251	37.68	176	25.15	109	16.22	54	4.28	21	-0.66
Sorex araneus	Other	1069	387.42	988	354.73	807	245.35	671	178.61	569	136.35	484	105.94	390	67.53	305	36.48	236	22.68	169	18.15	101	8.22	54	4.28	17	-4.66
Sorex cinereus	Other	790	108.42	761	127.73	681	119.35	598	105.61	518	85.35	423	44.94	351	28.53	277	8.48	217	3.68	152	1.15	94	1.22	56	6.28	17	-4.66
Sousa chinensis	Cetacea	19	-662.58	19	-614.27	19	-542.65	19	-473.39	18	-414.65	18	-360.06	18	-304.47	18	-250.52	18	-195.32	16	-134.85	16	-76.78	14	-35.72	9	-12.66
Speothos venaticus	Other	608	-73.58	594	-39.27	555	-6.65	516	23.61	462	29.35	418	39.94	347	24.53	288	19.48	232	18.68	152	1.15	88	-4.78	48	-1.72	21	-0.66
Spermophilus dauricus	Other	1057	375.42	873	239.73	761	199.35	644	151.61	555	122.35	464	85.94	402	79.53	331	62.48	257	43.68	182	31.15	113	20.22	59	9.28	32	10.34
Spilogale gracilis	Other	784	102.42	708	74.73	612	50.35	558	65.61	511	78.35	453	74.94	394	71.53	329	60.48	253	39.68	172	21.15	100	7.22	52	2.28	20	-1.66
Spilogale interrupta	Other	947	265.42	810	176.73	683	121.35	617	124.61	556	123.35	493	114.94	419	96.53	347	78.48	268	54.68	188	37.15	112	19.22	59	9.28	28	6.34
Steno bredanensis	Cetacea	18	-663.58	18	-615.27	18	-543.65	18	-474.39	18	-414.65	18	-360.06	17	-305.47	17	-251.52	16	-197.32	15	-135.85	15	-77.78	13	-36.72	11	-10.66
Sturnira hondurensis	Chiroptera	547	-134.58	500	-133.27	407	-154.65	330	-162.39	287	-145.65	263	-115.06	225	-97.47	192	-76.52	163	-50.32	120	-30.85	73	-19.78	41	-8.72	18	-3.66
Suncus etruscus	Other	898	216.42	861	227.73	766	204.35	662	169.61	571	138.35	483	104.94	394	71.53	315	46.48	247	33.68	177	26.15	104	11.22	49	-0.72	19	-2.66
Suricata suricatta	Other	712	30.42	690	56.73	599	37.35	526	33.61	478	45.35	431	52.94	369	46.53	310	41.48	235	21.68	165	14.15	97	4.22	50	0.28	22	0.34
Sus cebifrons	Other	937	255.42	837	203.73	746	184.35	654	161.61	573	140.35	505	126.94	411	88.53	337	68.48	273	59.68	191	40.15	111	18.22	60	10.28	25	3.34
Sus scrofa	Other	1450	768.42	1052	418.73	846	284.35	712	219.61	626	193.35	541	162.94	446	123.53	364	95.48	297	83.68	206	55.15	123	30.22	69	19.28	29	7.34
Sylvicapra grimmia	Other	775	93.42	733	99.73	676	114.35	593	100.61	509	76.35	457	78.94	394	71.53	329	60.48	266	52.68	191	40.15	124	31.22	70	20.28	38	16.34
Sylvilagus bachmani	Other	618	-63.58	598	-35.27	559	-2.65	518	25.61	461	28.35	411	32.94	356	33.53	293	24.48	238	24.68	161	10.15	96	3.22	46	-3.72	18	-3.66
Symphalangus syndactylus	Haplorrhini	235	-446.58	226	-407.27	211	-350.65	204	-288.39	195	-237.65	190	-188.06	178	-144.47	162	-106.52	140	-73.32	108	-42.85	78	-14.78	44	-5.72	22	0.34
Syncerus caffer	Other	922	240.42	829	195.73	730	168.35	625	132.61	541	108.35	472	93.94	403	80.53	341	72.48	259	45.68	188	37.15	119	26.22	66	16.28	27	5.34
Tachyglossus aculeatus	Other	1799	1117.42	1459	825.73	1058	496.35	741	248.61	571	138.35	465	86.94	385	62.53	318	49.48	254	40.68	185	34.15	123	30.22	74	24.28	38	16.34
Tadarida brasiliensis	Chiroptera	327	-354.58	308	-325.27	289	-272.65	276	-216.39	260	-172.65	238	-140.06	210	-112.47	179	-89.52	154	-59.32	114	-36.85	61	-31.78	31	-18.72	12	-9.66
Talpa occidentalis	Other	1357	675.42	1194	560.73	983	421.35	741	248.61	548	115.35	447	68.94	368	45.53	306	37.48	231	17.68	155	4.15	93	0.22	46	-3.72	16	-5.66
Tamandua tetradactyla	Other	1284	602.42	1083	449.73	855	293.35	699	206.61	593	160.35	493	114.94	421	98.53	339	70.48	267	53.68	195	44.15	115	22.22	57	7.28	25	3.34
Tamias sibiricus	Other	929	247.42	864	230.73	762	200.35	654	161.61	557	124.35	477	98.94	397	74.53	338	69.48	268	54.68	188	37.15	124	31.22	73	23.28	33	11.34
Tapirus indicus	Other	1017	335.42	980	346.73	822	260.35	668	175.61	582	149.35	502	123.94	412	89.53	345	76.48	274	60.68	195	44.15	119	26.22	74	24.28	30	8.34
Tapirus terrestris	Other	953	271.42	914	280.73	782	220.35	638	145.61	553	120.35	481	102.94	390	67.53	322	53.48	262	48.68	184	33.15	116	23.22	60	10.28	24	2.34
Taxidea taxus jeffersonii	Other	774	92.42	719	85.73	633	71.35	577	84.61	517	84.35	452	73.94	384	61.53	311	42.48	239	25.68	169	18.15	97	4.22	45	-4.72	22	0.34
Theropithecus gelada	Haplorrhini	367	-314.58	360	-273.27	348	-213.65	335	-157.39	314	-118.65	296	-82.06	268	-54.47	231	-37.52	191	-22.32	140	-10.85	88	-4.78	50	0.28	16	-5.66
Thomomys bottae	Other	1095	413.42	910	276.73	770	208.35	676	183.61	600	167.35	518	139.94	430	107.53	341	72.48	259	45.68	179	28.15	110	17.22	61	11.28	26	4.34
Thryonomys swinderianus	Other	489	-192.58	481	-152.27	462	-99.65	434	-58.39	390	-42.65	347	-31.06	297	-25.47	250	-18.52	197	-16.32	142	-8.85	93	0.22	51	1.28	21	-0.66
Thylacinus cynocephalus	Other	653	-28.58	651	17.73	625	63.35	551	58.61	474	41.35	407	28.94	330	7.53	272	3.48	208	-5.32	152	1.15	93	0.22	50	0.28	24	2.34
Tokudaia osimensis	Other	1208	526.42	1119	485.73	928	366.35	761	268.61	631	198.35	532	153.94	441	118.53	361	92.48	271	57.68	194	43.15	122	29.22	54	4.28	22	0.34
Tolypeutes matacus	Other	1453	771.42	1340	706.73	1143	581.35	903	410.61	708	275.35	549	170.94	457	134.53	378	109.48	299	85.68	222	71.15	136	43.22	80	30.28	45	23.34
Tonatia saurophila	Chiroptera	454	-227.58	411	-222.27	353	-208.65	311	-181.39	284	-148.65	260	-118.06	230	-92.47	191	-77.52	162	-51.32	115	-35.85	68	-24.78	33	-16.72	13	-8.66
Trachops cirrhosus	Chiroptera	321	-360.58	310	-323.27	291	-270.65	277	-215.39	257	-175.65	235	-143.06	205	-117.47	183	-85.52	157	-56.32	109	-41.85	67	-25.78	32	-17.72	12	-9.66
Trachypithecus francoisi	Haplorrhini	220	-461.58	219	-414.27	213	-348.65	209	-283.39	203	-229.65	192	-186.06	183	-139.47	165	-103.52	138	-75.32	111	-39.85	74	-18.78	45	-4.72	22	0.34
Trachypithecus phayrei crepuscula	Haplorrhini	212	-469.58	212	-421.27	208	-353.65	206	-286.39	198	-234.65	190	-188.06	181	-141.47	164	-104.52	138	-75.32	113	-37.85	79	-13.78	50	0.28	23	1.34
Tragelaphus buxtoni	Other	227	-454.58	227	-406.27	227	-334.65	222	-270.39	216	-216.65	201	-177.06	179	-143.47	156	-112.52	135	-78.32	102	-48.85	70	-22.78	34	-15.72	13	-8.66
Tragelaphus eurycerus	Other	1111	429.42	993	359.73	845	283.35	721	228.61	612	179.35	521	142.94	435	112.53	348	79.48	266	52.68	193	42.15	111	18.22	63	13.28	29	7.34
Tragelaphus imberbis	Other	937	255.42	884	250.73	799	237.35	692	199.61	600	167.35	519	140.94	435	112.53	351	82.48	271	57.68	194	43.15	117	24.22	64	14.28	31	9.34
Tragelaphus oryx	Other	183	-498.58	183	-450.27	181	-380.65	180	-312.39	175	-257.65	163	-215.06	151	-171.47	136	-132.52	118	-95.32	89	-61.85	57	-35.78	32	-17.72	13	-8.66
Tragelaphus scriptus	Other	1015	333.42	963	329.73	832	270.35	717	224.61	614	181.35	531	152.94	447	124.53	362	93.48	288	74.68	200	49.15	122	29.22	67	17.28	42	20.34
Tragelaphus spekii	Other	752	70.42	724	90.73	681	119.35	605	112.61	528	95.35	472	93.94	391	68.53	324	55.48	259	45.68	181	30.15	102	9.22	53	3.28	25	3.34
Tragelaphus strepsiceros	Other	1005	323.42	938	304.73	816	254.35	707	214.61	599	166.35	516	137.94	435	112.53	347	78.48	275	61.68	193	42.15	121	28.22	64	14.28	29	7.34
Tragulus javanicus	Other	1082	400.42	981	347.73	890	328.35	765	272.61	633	200.35	518	139.94	426	103.53	349	80.48	271	57.68	186	35.15	107	14.22	52	2.28	22	0.34
Tragulus kanchil	Other	1028	346.42	964	330.73	859	297.35	738	245.61	608	175.35	493	114.94	397	74.53	331	62.48	254	40.68	178	27.15	104	11.22	59	9.28	20	-1.66
Tremarctos ornatus	Other	879	197.42	830	196.73	721	159.35	618	125.61	539	106.35	467	88.94	398	75.53	335	66.48	259	45.68	183	32.15	111	18.22	44	-5.72	21	-0.66
Trichechus manatus latirostris	Sirenia	475	-206.58	469	-164.27	432	-129.65	371	-121.39	326	-106.65	299	-79.06	270	-52.47	234	-34.52	202	-11.32	152	1.15	100	7.22	60	10.28	29	7.34
Trichosurus vulpecula	Other	1288	606.42	1198	564.73	940	378.35	732	239.61	621	188.35	508	129.94	409	86.53	331	62.48	246	32.68	175	24.15	107	14.22	52	2.28	25	3.34
Tupaia belangeri	Other	487	-194.58	458	-175.27	424	-137.65	384	-108.39	336	-96.65	289	-89.06	245	-77.47	212	-56.52	174	-39.32	125	-25.85	81	-11.78	46	-3.72	24	2.34
Tupaia chinensis	Other	1169	487.42	1088	454.73	930	368.35	767	274.61	642	209.35	531	152.94	435	112.53	365	96.48	287	73.68	199	48.15	113	20.22	67	17.28	29	7.34
Tupaia tana	Other	1513	831.42	1261	627.73	1003	441.35	816	323.61	669	236.35	554	175.94	443	120.53	374	105.48	285	71.68	205	54.15	115	22.22	57	7.28	28	6.34
Tursiops aduncus	Cetacea	13	-668.58	12	-621.27	12	-549.65	12	-480.39	12	-420.65	11	-367.06	11	-311.47	11	-257.52	11	-202.32	10	-140.85	10	-82.78	7	-42.72	5	-16.66
Tursiops truncatus	Cetacea	13	-668.58	13	-620.27	13	-548.65	13	-479.39	13	-419.65	13	-365.06	12	-310.47	12	-256.52	12	-201.32	11	-139.85	11	-81.78	10	-39.72	7	-14.66
Tympanoctomys barrerae	Other	318	-363.58	317	-316.27	315	-246.65	307	-185.39	292	-140.65	271	-107.06	240	-82.47	211	-57.52	165	-48.32	120	-30.85	74	-18.78	45	-4.72	17	-4.66
Typhlomys cinereus	Other	971	289.42	887	253.73	789	227.35	700	207.61	581	148.35	486	107.94	408	85.53	332	63.48	259	45.68	186	35.15	110	17.22	55	5.28	19	-2.66
Urocitellus parryii	Other	751	69.42	734	100.73	669	107.35	595	102.61	506	73.35	445	66.94	380	57.53	318	49.48	238	24.68	162	11.15	102	9.22	62	12.28	19	-2.66
Uromys caudimaculatus	Other	985	303.42	892	258.73	749	187.35	631	138.61	559	126.35	468	89.94	396	73.53	326	57.48	265	51.68	177	26.15	119	26.22	57	7.28	23	1.34
Uropsilus gracilis	Other	959	277.42	936	302.73	842	280.35	669	176.61	515	82.35	421	42.94	356	33.53	290	21.48	220	6.68	156	5.15	87	-5.78	52	2.28	17	-4.66
Ursus americanus	Other	1273	591.42	1078	444.73	850	288.35	721	228.61	618	185.35	539	160.94	447	124.53	374	105.48	292	78.68	201	50.15	119	26.22	57	7.28	22	0.34
Ursus arctos	Other	1287	605.42	1080	446.73	856	294.35	724	231.61	622	189.35	536	157.94	450	127.53	376	107.48	293	79.68	200	49.15	117	24.22	54	4.28	19	-2.66
Ursus maritimus	Other	1111	429.42	1005	371.73	828	266.35	710	217.61	626	193.35	540	161.94	449	126.53	374	105.48	299	85.68	198	47.15	118	25.22	55	5.28	22	0.34
Ursus thibetanus thibetanus	Other	972	290.42	864	230.73	756	194.35	660	167.61	580	147.35	500	121.94	432	109.53	363	94.48	283	69.68	192	41.15	115	22.22	55	5.28	18	-3.66
Varecia variegata	Other	551	-130.58	542	-91.27	490	-71.65	433	-59.39	398	-34.65	362	-16.06	318	-4.47	265	-3.52	221	7.68	147	-3.85	92	-0.78	49	-0.72	22	0.34
Vicugna pacos	Other	502	-179.58	492	-141.27	465	-96.65	441	-51.39	416	-16.65	384	5.94	337	14.53	283	14.48	213	-0.32	150	-0.85	97	4.22	44	-5.72	21	-0.66
Vicugna vicugna mensalis	Other	621	-60.58	590	-43.27	551	-10.65	504	11.61	473	40.35	431	52.94	377	54.53	310	41.48	246	32.68	166	15.15	97	4.22	53	3.28	19	-2.66
Vombatus ursinus	Other	1088	406.42	1009	375.73	834	272.35	683	190.61	583	150.35	495	116.94	406	83.53	320	51.48	244	30.68	164	13.15	101	8.22	53	3.28	24	2.34
Vulpes ferrilata	Other	789	107.42	694	60.73	610	48.35	544	51.61	486	53.35	435	56.94	369	46.53	302	33.48	231	17.68	158	7.15	88	-4.78	43	-6.72	19	-2.66
Vulpes lagopus	Other	705	23.42	657	23.73	588	26.35	529	36.61	472	39.35	426	47.94	365	42.53	305	36.48	238	24.68	165	14.15	93	0.22	44	-5.72	22	0.34
Vulpes vulpes	Other	742	60.42	670	36.73	603	41.35	549	56.61	492	59.35	444	65.94	369	46.53	303	34.48	238	24.68	161	10.15	92	-0.78	51	1.28	20	-1.66
Xerus inauris	Other	730	48.42	697	63.73	634	72.35	572	79.61	490	57.35	431	52.94	368	45.53	310	41.48	233	19.68	170	19.15	97	4.22	48	-1.72	18	-3.66
Xerus rutilus	Other	690	8.42	663	29.73	617	55.35	549	56.61	479	46.35	420	41.94	373	50.53	302	33.48	232	18.68	161	10.15	94	1.22	45	-4.72	15	-6.66
Zalophus californianus	Pinnipedia	392	-289.58	362	-271.27	337	-224.65	309	-183.39	290	-142.65	267	-111.06	249	-73.47	218	-50.52	177	-36.32	140	-10.85	88	-4.78	45	-4.72	20	-1.66
Zapus hudsonius	Other	694	12.42	664	30.73	605	43.35	511	18.61	430	-2.65	369	-9.06	311	-11.47	268	-0.52	208	-5.32	152	1.15	92	-0.78	46	-3.72	16	-5.66
Ziphius cavirostris	Cetacea	27	-654.58	27	-606.27	27	-534.65	27	-465.39	27	-405.65	26	-352.06	25	-297.47	25	-243.52	25	-188.32	24	-126.85	23	-69.78	19	-30.72	10	-11.66

## Sheet: Supplementary-Table-4
Species name	Family	Infraorder	Suborder	Order	Superorder	Group	OR Functional	Foraging Strata	Foraging Strata Certainty	Foraging Strata Comment
Acinonyx jubatus	Felidae	na	Feliformia	Carnivora	Laurasiatheria	Other	774	Ground	A	NA
Acomys cahirinus	Muridae	na	Myomorpha	Rodentia	Euarchontoglires	Other	829	Ground	A	NA
Acomys dimidiatus	Muridae	na	Myomorpha	Rodentia	Euarchontoglires	Other	838	Ground	A	NA
Acomys kempi	Muridae	na	Myomorpha	Rodentia	Euarchontoglires	Other	768	Ground	A	NA
Acomys percivali	Muridae	na	Myomorpha	Rodentia	Euarchontoglires	Other	753	Ground	A	NA
Acomys russatus	Muridae	na	Myomorpha	Rodentia	Euarchontoglires	Other	817	Ground	A	NA
Addax nasomaculatus	Bovidae	Pecora	Ruminantia	Artiodactyla	Laurasiatheria	Other	739	Ground	A	NA
Aepyceros melampus	Bovidae	Pecora	Ruminantia	Artiodactyla	Laurasiatheria	Other	252	Ground	A	NA
Ailuropoda melanoleuca	Ursidae	na	Caniformia	Carnivora	Laurasiatheria	Other	738	Ground	A	NA
Alcelaphus buselaphus	Bovidae	Pecora	Ruminantia	Artiodactyla	Laurasiatheria	Other	76	Ground	A	NA
Alces alces	Cervidae	Pecora	Ruminantia	Artiodactyla	Laurasiatheria	Other	829	Ground	A	NA
Alouatta palliata	Atelidae	Simiiformes	Haplorrhini	Primates	Euarchontoglires	Haplorrhini	314	Arboreal	A	NA
Ammotragus lervia	Bovidae	Pecora	Ruminantia	Artiodactyla	Laurasiatheria	Other	851	Ground	A	NA
Anoura caudifer	Phyllostomidae	na	Microchiroptera	Chiroptera	Laurasiatheria	Chiroptera	369	Arboreal	A	NA
Antechinus flavipes	Dasyuridae	na	na	Dasyuromorphia	na	Other	1057	Ground	A	NA
Antechinus stuartii	Dasyuridae	na	na	Dasyuromorphia	na	Other	1078	Ground	A	NA
Antidorcas marsupialis	Bovidae	Pecora	Ruminantia	Artiodactyla	Laurasiatheria	Other	770	Ground	A	NA
Antilocapra americana	Antilocapridae	Pecora	Ruminantia	Artiodactyla	Laurasiatheria	Other	725	Ground	A	NA
Antrozous pallidus	Vespertilionidae	na	Microchiroptera	Chiroptera	Laurasiatheria	Chiroptera	462	Ground	A	NA
Aotus nancymaae	Aotidae	Simiiformes	Haplorrhini	Primates	Euarchontoglires	Haplorrhini	404	Arboreal	A	NA
Aplodontia rufa	Aplodontiidae	na	Sciuromorpha	Rodentia	Euarchontoglires	Other	720	Ground	A	NA
Apodemus speciosus	Muridae	na	Myomorpha	Rodentia	Euarchontoglires	Other	724	Ground	A	NA
Apodemus sylvaticus	Muridae	na	Myomorpha	Rodentia	Euarchontoglires	Other	1428	Ground	A	NA
Arctocephalus gazella	Otariidae	na	Caniformia	Carnivora	Laurasiatheria	Pinnipedia	185	Marine	A	NA
Arctocephalus townsendi	Otariidae	na	Caniformia	Carnivora	Laurasiatheria	Pinnipedia	322	Marine	A	NA
Artibeus jamaicensis	Phyllostomidae	na	Microchiroptera	Chiroptera	Laurasiatheria	Chiroptera	587	Arboreal	A	NA
Arvicanthis niloticus	Muridae	na	Myomorpha	Rodentia	Euarchontoglires	Other	1121	Ground	A	NA
Arvicola amphibius	Cricetidae	na	Myomorpha	Rodentia	Euarchontoglires	Other	970	Ground	A	NA
Ateles geoffroyi	Atelidae	Simiiformes	Haplorrhini	Primates	Euarchontoglires	Haplorrhini	325	Arboreal	A	NA
Ateles hybridus	Atelidae	Simiiformes	Haplorrhini	Primates	Euarchontoglires	Haplorrhini	152	Arboreal	A	NA
Axis porcinus	Cervidae	Pecora	Ruminantia	Artiodactyla	Laurasiatheria	Other	1194	Ground	A	NA
Balaenoptera bonaerensis	Balaenopteridae	Cetacea	Whippomorpha	Artiodactyla	Laurasiatheria	Cetacea	69	Marine	A	NA
Balaenoptera musculus	Balaenopteridae	Cetacea	Whippomorpha	Artiodactyla	Laurasiatheria	Cetacea	88	Marine	A	NA
Balaenoptera physalus	Balaenopteridae	Cetacea	Whippomorpha	Artiodactyla	Laurasiatheria	Cetacea	77	Marine	A	NA
Beatragus hunteri	Bovidae	Pecora	Ruminantia	Artiodactyla	Laurasiatheria	Other	743	Ground	A	NA
Bradypus variegatus	Bradypodidae	na	Folivora	Pilosa	Xenarthra	Other	63	Arboreal	A	NA
Bubalus depressicornis	Bovidae	Pecora	Ruminantia	Artiodactyla	Laurasiatheria	Other	933	Ground	A	NA
Budorcas taxicolor	Bovidae	Pecora	Ruminantia	Artiodactyla	Laurasiatheria	Other	929	Ground	A	NA
Callithrix jacchus	Cebidae	Simiiformes	Platyrrhini	Primates	Euarchontoglires	Other	379	Arboreal	A	NA
Callorhinus ursinus	Otariidae	na	Caniformia	Carnivora	Laurasiatheria	Pinnipedia	374	Marine	A	NA
Camelus dromedarius	Camelidae	na	Tylopoda	Artiodactyla	Laurasiatheria	Other	595	Ground	A	NA
Caperea marginata	Neobalaenidae	Cetacea	Whippomorpha	Artiodactyla	Laurasiatheria	Cetacea	62	Marine	A	NA
Capra ibex	Bovidae	Pecora	Ruminantia	Artiodactyla	Laurasiatheria	Other	342	Ground	A	NA
Capra sibirica	Bovidae	Pecora	Ruminantia	Artiodactyla	Laurasiatheria	Other	907	Ground	A	NA
Capreolus capreolus	Cervidae	Pecora	Ruminantia	Artiodactyla	Laurasiatheria	Other	399	Ground	A	NA
Capreolus pygargus	Cervidae	Pecora	Ruminantia	Artiodactyla	Laurasiatheria	Other	889	Ground	A	NA
Capromys pilorides	Capromyidae	na	Hystricomorpha	Rodentia	Euarchontoglires	Other	800	Ground	A	NA
Caracal caracal	Felidae	na	Feliformia	Carnivora	Laurasiatheria	Other	660	Ground	A	NA
Carollia perspicillata	Phyllostomidae	na	Microchiroptera	Chiroptera	Laurasiatheria	Chiroptera	359	Arboreal	A	NA
Castor canadensis	Castoridae	na	Castorimorpha	Rodentia	Euarchontoglires	Other	722	Ground	A	NA
Catagonus wagneri	Tayassuidae	na	Suina	Artiodactyla	Laurasiatheria	Other	736	Ground	A	NA
Cavia aperea	Caviidae	na	Hystricomorpha	Rodentia	Euarchontoglires	Other	323	Ground	A	NA
Cavia tschudii	Caviidae	na	Hystricomorpha	Rodentia	Euarchontoglires	Other	832	Ground	A	NA
Cebus albifrons	Cebidae	Simiiformes	Haplorrhini	Primates	Euarchontoglires	Haplorrhini	368	Arboreal	A	NA
Cercocebus atys	Cercopithecidae	Simiiformes	Haplorrhini	Primates	Euarchontoglires	Haplorrhini	374	Arboreal	A	NA
Cercopithecus mitis	Cercopithecidae	Simiiformes	Haplorrhini	Primates	Euarchontoglires	Haplorrhini	279	Arboreal	A	NA
Cercopithecus mona	Cercopithecidae	Simiiformes	Haplorrhini	Primates	Euarchontoglires	Haplorrhini	295	Arboreal	A	NA
Cercopithecus neglectus	Cercopithecidae	Simiiformes	Haplorrhini	Primates	Euarchontoglires	Haplorrhini	244	Arboreal	A	NA
Cervus elaphus	Bovidae	Pecora	Ruminantia	Artiodactyla	Laurasiatheria	Other	1296	Ground	A	NA
Chaetophractus vellerosus	Chlamyphoridae	na	na	Cingulata	Xenarthra	Other	889	Ground	A	NA
Cheirogaleus medius	Cheirogaleidae	Lemuriformes	Strepsirrhini	Primates	Euarchontoglires	Other	604	Arboreal	A	NA
Chinchilla lanigera	Chinchillidae	na	Hystricomorpha	Rodentia	Euarchontoglires	Other	705	Ground	A	NA
Chlorocebus aethiops	Cercopithecidae	Simiiformes	Haplorrhini	Primates	Euarchontoglires	Haplorrhini	292	Scansorial	A	NA
Chlorocebus sabaeus	Cercopithecidae	Simiiformes	Haplorrhini	Primates	Euarchontoglires	Haplorrhini	331	Scansorial	A	NA
Choloepus didactylus	Megalonychidae	na	Folivora	Pilosa	Xenarthra	Other	1491	Arboreal	A	NA
Choloepus hoffmanni	Megalonychidae	na	Folivora	Pilosa	Xenarthra	Other	1613	Arboreal	A	NA
Chrysochloris asiatica	Chrysochloridae	na	na	Afrosoricida	Afrotheria	Other	1053	Ground	A	NA
Chrysocyon brachyurus	Canidae	na	Caniformia	Carnivora	Laurasiatheria	Other	636	Ground	A	NA
Coendou prehensilis	Erethizontidae	na	Hystricomorpha	Rodentia	Euarchontoglires	Other	628	Arboreal	A	NA
Colobus guereza	Cercopithecidae	Simiiformes	Haplorrhini	Primates	Euarchontoglires	Haplorrhini	173	Arboreal	A	NA
Condylura cristata	Talpidae	na	na	Eulipotyphla	Laurasiatheria	Other	655	Ground	A	NA
Connochaetes taurinus	Bovidae	Pecora	Ruminantia	Artiodactyla	Laurasiatheria	Other	804	Ground	A	NA
Craseonycteris thonglongyai	Craseonycteridae	na	Microchiroptera	Chiroptera	Laurasiatheria	Chiroptera	151	Aerial	A	NA
Cricetomys gambianus	Nesomyidae	na	Myomorpha	Rodentia	Euarchontoglires	Other	888	Ground	A	NA
Crocidura indochinensis	Soricidae	na	na	Eulipotyphla	Laurasiatheria	Other	756	Ground	A	NA
Crocuta crocuta	Hyaenidae	na	Feliformia	Carnivora	Laurasiatheria	Other	790	Ground	A	NA
Cryptoprocta ferox	Eupleridae	na	Feliformia	Carnivora	Laurasiatheria	Other	643	Scansorial	A	NA
Ctenodactylus gundi	Ctenodactylidae	na	Hystricomorpha	Rodentia	Euarchontoglires	Other	344	Ground	A	NA
Ctenomys sociabilis	Ctenomyidae	na	Hystricomorpha	Rodentia	Euarchontoglires	Other	612	Ground	A	NA
Cuniculus paca	Cuniculidae	na	Hystricomorpha	Rodentia	Euarchontoglires	Other	688	Ground	A	NA
Cynocephalus volans	Cynocephalidae	na	na	Dermoptera	Euarchontoglires	Other	1032	Arboreal	A	NA
Cynomys gunnisoni	Sciuridae	na	Sciuromorpha	Rodentia	Euarchontoglires	Other	1195	Ground	A	NA
Cynopterus brachyotis	Pteropodidae	na	Megachiroptera	Chiroptera	Laurasiatheria	Chiroptera	389	Arboreal	A	NA
Damaliscus lunatus	Bovidae	Pecora	Ruminantia	Artiodactyla	Laurasiatheria	Other	940	Ground	A	NA
Dasyprocta punctata	Dasyproctidae	na	Hystricomorpha	Rodentia	Euarchontoglires	Other	1818	Ground	A	NA
Dasypus novemcinctus	Dasypodidae	na	na	Cingulata	Xenarthra	Other	1535	Ground	A	NA
Dasyurus viverrinus	Dasyuridae	na	na	Dasyuromorphia	na	Other	1148	Ground	A	NA
Daubentonia madagascariensis	Daubentoniidae	Chiromyiformes	Strepsirrhini	Primates	Euarchontoglires	Other	656	Arboreal	A	NA
Delphinapterus leucas	Monodontidae	Cetacea	Whippomorpha	Artiodactyla	Laurasiatheria	Cetacea	28	Marine	A	NA
Desmodus rotundus	Phyllostomidae	na	Microchiroptera	Chiroptera	Laurasiatheria	Chiroptera	697	Ground	A	NA
Dicrostonyx torquatus	Cricetidae	na	Myomorpha	Rodentia	Euarchontoglires	Other	589	Ground	A	NA
Dinomys branickii	Dinomyidae	na	Hystricomorpha	Rodentia	Euarchontoglires	Other	883	Ground	A	NA
Dipodomys merriami	Heteromyidae	na	Castorimorpha	Rodentia	Euarchontoglires	Other	1004	Ground	A	NA
Dipodomys ordii	Heteromyidae	na	Castorimorpha	Rodentia	Euarchontoglires	Other	835	Ground	A	NA
Dipodomys spectabilis	Heteromyidae	na	Castorimorpha	Rodentia	Euarchontoglires	Other	875	Ground	A	NA
Dipodomys stephensi	Heteromyidae	na	Castorimorpha	Rodentia	Euarchontoglires	Other	785	Ground	A	NA
Dolichotis patagonum	Caviidae	na	Hystricomorpha	Rodentia	Euarchontoglires	Other	523	Ground	A	NA
Dromiciops gliroides	Microbiotheriidae	na	na	Microbiotheria	na	Other	883	Scansorial	A	NA
Dugong dugon	Dugongidae	na	na	Sirenia	Afrotheria	Sirenia	357	Marine	A	NA
Echinops telfairi	Tenrecidae	na	na	Afrosoricida	Afrotheria	Other	895	Ground	A	NA
Eidolon dupreanum	Pteropodidae	na	Megachiroptera	Chiroptera	Laurasiatheria	Chiroptera	438	Arboreal	A	NA
Eidolon helvum	Pteropodidae	na	Megachiroptera	Chiroptera	Laurasiatheria	Chiroptera	317	Arboreal	A	NA
Eira barbara	Mustelidae	na	Caniformia	Carnivora	Laurasiatheria	Other	836	Ground	A	NA
Elaphurus davidianus	Cervidae	Pecora	Ruminantia	Artiodactyla	Laurasiatheria	Other	1059	Ground	A	NA
Elephantulus edwardii	Macroscelididae	na	na	Macroscelidea	Afrotheria	Other	899	Ground	A	NA
Eonycteris spelaea	Pteropodidae	na	Megachiroptera	Chiroptera	Laurasiatheria	Chiroptera	256	Arboreal	A	NA
Eptesicus fuscus	Vespertilionidae	na	Microchiroptera	Chiroptera	Laurasiatheria	Chiroptera	407	Aerial	A	NA
Equus quagga	Equidae	na	na	Perissodactyla	Laurasiatheria	Other	1065	Ground	A	NA
Erethizon dorsatum	Erethizontidae	na	Hystricomorpha	Rodentia	Euarchontoglires	Other	862	Scansorial	A	NA
Erinaceus europaeus	Erinaceidae	na	na	Eulipotyphla	Laurasiatheria	Other	971	Ground	A	NA
Erythrocebus patas	Cercopithecidae	Simiiformes	Haplorrhini	Primates	Euarchontoglires	Haplorrhini	324	Ground	A	NA
Eschrichtius robustus	Eschrichtiidae	Cetacea	Whippomorpha	Artiodactyla	Laurasiatheria	Cetacea	88	Marine	A	NA
Eubalaena glacialis	Balaenidae	Cetacea	Whippomorpha	Artiodactyla	Laurasiatheria	Cetacea	101	Marine	A	NA
Eubalaena japonica	Balaenidae	Cetacea	Whippomorpha	Artiodactyla	Laurasiatheria	Cetacea	97	Marine	A	NA
Eudorcas thomsonii	Bovidae	Pecora	Ruminantia	Artiodactyla	Laurasiatheria	Other	817	Ground	A	NA
Eulemur fulvus	Lemuridae	Lemuriformes	Strepsirrhini	Primates	Euarchontoglires	Other	652	Arboreal	A	NA
Eulemur macaco	Lemuridae	Lemuriformes	Strepsirrhini	Primates	Euarchontoglires	Other	620	Arboreal	A	NA
Eulemur mongoz	Lemuridae	Lemuriformes	Strepsirrhini	Primates	Euarchontoglires	Other	668	Arboreal	A	NA
Eumetopias jubatus	Otariidae	na	Caniformia	Carnivora	Laurasiatheria	Pinnipedia	356	Marine	A	NA
Felis chaus	Felidae	na	Feliformia	Carnivora	Laurasiatheria	Other	862	Ground	A	NA
Felis nigripes	Felidae	na	Feliformia	Carnivora	Laurasiatheria	Other	619	Ground	A	NA
Galago moholi	Galagidae	Lorisiformes	Strepsirrhini	Primates	Euarchontoglires	Other	694	Arboreal	A	NA
Galemys pyrenaicus	Talpidae	na	na	Eulipotyphla	Laurasiatheria	Other	607	Ground	A	NA
Glaucomys volans	Sciuridae	na	Sciuromorpha	Rodentia	Euarchontoglires	Other	929	Arboreal	A	NA
Glis glis	Gliridae	na	Sciuromorpha	Rodentia	Euarchontoglires	Other	808	Arboreal	A	NA
Globicephala melas	Delphinidae	Cetacea	Whippomorpha	Artiodactyla	Laurasiatheria	Cetacea	22	Marine	A	NA
Gracilinanus agilis	Didelphidae	na	na	Didelphimorphia	na	Other	966	Scansorial	A	NA
Grammomys dolichurus	Muridae	na	Myomorpha	Rodentia	Euarchontoglires	Other	673	Arboreal	A	NA
Grampus griseus	Delphinidae	Cetacea	Whippomorpha	Artiodactyla	Laurasiatheria	Cetacea	19	Marine	A	NA
Graphiurus murinus	Gliridae	na	Sciuromorpha	Rodentia	Euarchontoglires	Other	769	Scansorial	A	NA
Gymnobelideus leadbeateri	Petauridae	na	na	Diprotodontia	na	Other	886	Arboreal	A	NA
Halichoerus grypus	Phocidae	na	Caniformia	Carnivora	Laurasiatheria	Pinnipedia	418	Marine	A	NA
Helarctos malayanus	Ursidae	na	Caniformia	Carnivora	Laurasiatheria	Other	778	Ground	A	NA
Helogale parvula	Herpestidae	na	Feliformia	Carnivora	Laurasiatheria	Other	994	Ground	A	NA
Heterocephalus glaber	Bathyergidae	na	Hystricomorpha	Rodentia	Euarchontoglires	Other	863	Ground	A	NA
Heterohyrax brucei	Procaviidae	na	na	Hyracoidea	Afrotheria	Other	921	Scansorial	A	NA
Hippopotamus amphibius	Hippopotamidae	Ancodonta	Whippomorpha	Artiodactyla	Laurasiatheria	Other	1267	Ground	A	NA
Hipposideros armiger	Hipposideridae	na	Microchiroptera	Chiroptera	Laurasiatheria	Chiroptera	291	Aerial	A	NA
Hipposideros galeritus	Hipposideridae	na	Microchiroptera	Chiroptera	Laurasiatheria	Chiroptera	237	Aerial	A	NA
Hippotragus equinus	Bovidae	Pecora	Ruminantia	Artiodactyla	Laurasiatheria	Other	828	Ground	A	NA
Homo sapiens	Hominidae	Simiiformes	Haplorrhini	Primates	Euarchontoglires	Haplorrhini	413	Ground	A	NA
Hyaena hyaena	Hyaenidae	na	Feliformia	Carnivora	Laurasiatheria	Other	785	Ground	A	NA
Hydrochoerus hydrochaeris	Hydrochaeridae	na	Hystricomorpha	Rodentia	Euarchontoglires	Other	738	Ground	A	NA
Hydropotes inermis	Cervidae	Pecora	Ruminantia	Artiodactyla	Laurasiatheria	Other	873	Ground	A	NA
Hylobates moloch	Hylobatidae	Simiiformes	Haplorrhini	Primates	Euarchontoglires	Haplorrhini	246	Arboreal	A	NA
Hylobates pileatus	Hylobatidae	Simiiformes	Haplorrhini	Primates	Euarchontoglires	Haplorrhini	237	Arboreal	A	NA
Hylomyscus alleni	Muridae	na	Myomorpha	Rodentia	Euarchontoglires	Other	648	Arboreal	A	NA
Hyperoodon ampullatus	Ziphiidae	Cetacea	Whippomorpha	Artiodactyla	Laurasiatheria	Cetacea	34	Marine	A	NA
Hystrix brachyura	Hystricidae	na	Hystricomorpha	Rodentia	Euarchontoglires	Other	760	Ground	A	NA
Hystrix cristata	Hystricidae	na	Hystricomorpha	Rodentia	Euarchontoglires	Other	744	Ground	A	NA
Ia io	Vespertilionidae	na	Microchiroptera	Chiroptera	Laurasiatheria	Chiroptera	437	Aerial	A	NA
Indri indri	Indriidae	Lemuriformes	Strepsirrhini	Primates	Euarchontoglires	Other	496	Arboreal	A	NA
Inia geoffrensis	Iniidae	Cetacea	Whippomorpha	Artiodactyla	Laurasiatheria	Cetacea	27	Marine	A	Freshwater
Jaculus jaculus	Dipodidae	na	Myomorpha	Rodentia	Euarchontoglires	Other	575	Ground	A	NA
Kobus ellipsiprymnus	Bovidae	Pecora	Ruminantia	Artiodactyla	Laurasiatheria	Other	908	Ground	A	NA
Kogia breviceps	Physeteridae	Cetacea	Whippomorpha	Artiodactyla	Laurasiatheria	Cetacea	21	Marine	A	NA
Lagenorhynchus obliquidens	Delphinidae	Cetacea	Whippomorpha	Artiodactyla	Laurasiatheria	Cetacea	20	Marine	A	NA
Lagorchestes hirsutus	Macropodidae	na	na	Diprotodontia	na	Other	933	Ground	A	NA
Lasiurus borealis	Vespertilionidae	na	Microchiroptera	Chiroptera	Laurasiatheria	Chiroptera	460	Aerial	A	NA
Lemur catta	Lemuridae	Lemuriformes	Strepsirrhini	Primates	Euarchontoglires	Other	681	Scansorial	A	NA
Leontopithecus rosalia	Cebidae	Simiiformes	Haplorrhini	Primates	Euarchontoglires	Haplorrhini	352	Arboreal	A	NA
Leopardus geoffroyi	Felidae	na	Feliformia	Carnivora	Laurasiatheria	Other	868	Ground	A	NA
Leptonychotes weddellii	Phocidae	na	Caniformia	Carnivora	Laurasiatheria	Pinnipedia	283	Marine	A	NA
Lepus americanus	Leporidae	na	na	Lagomorpha	Euarchontoglires	Other	494	Ground	A	NA
Lepus timidus	Leporidae	na	na	Lagomorpha	Euarchontoglires	Other	522	Ground	A	NA
Lipotes vexillifer	Lipotidae	Cetacea	Whippomorpha	Artiodactyla	Laurasiatheria	Cetacea	18	Marine	A	Freshwater
Litocranius walleri	Bovidae	Pecora	Ruminantia	Artiodactyla	Laurasiatheria	Other	843	Ground	A	NA
Lontra canadensis	Mustelidae	na	Caniformia	Carnivora	Laurasiatheria	Other	700	Ground	A	aquatic
Lophiomys imhausi	Muridae	na	Myomorpha	Rodentia	Euarchontoglires	Other	810	Scansorial	A	NA
Lophocebus aterrimus	Cercopithecidae	Simiiformes	Haplorrhini	Primates	Euarchontoglires	Haplorrhini	337	Arboreal	A	NA
Loris tardigradus	Lorisidae	Lorisiformes	Strepsirrhini	Primates	Euarchontoglires	Other	647	Arboreal	A	NA
Loxodonta africana	Elephantidae	na	na	Proboscidea	Afrotheria	Other	1986	Ground	A	NA
Lutra lutra	Mustelidae	na	Caniformia	Carnivora	Laurasiatheria	Other	775	Ground	A	aquatic
Lycaon pictus	Canidae	na	Caniformia	Carnivora	Laurasiatheria	Other	578	Ground	A	NA
Lynx canadensis	Felidae	na	Feliformia	Carnivora	Laurasiatheria	Other	811	Ground	A	NA
Lynx pardinus	Felidae	na	Feliformia	Carnivora	Laurasiatheria	Other	761	Ground	A	NA
Lynx rufus	Felidae	na	Feliformia	Carnivora	Laurasiatheria	Other	848	Ground	A	NA
Macaca arctoides	Cercopithecidae	Simiiformes	Haplorrhini	Primates	Euarchontoglires	Haplorrhini	351	Scansorial	A	NA
Macaca assamensis	Cercopithecidae	Simiiformes	Haplorrhini	Primates	Euarchontoglires	Haplorrhini	267	Scansorial	A	NA
Macaca cyclopis	Cercopithecidae	Simiiformes	Haplorrhini	Primates	Euarchontoglires	Haplorrhini	383	Scansorial	A	NA
Macaca fascicularis	Cercopithecidae	Simiiformes	Haplorrhini	Primates	Euarchontoglires	Haplorrhini	374	Scansorial	A	NA
Macaca mulatta	Cercopithecidae	Simiiformes	Haplorrhini	Primates	Euarchontoglires	Haplorrhini	382	Scansorial	A	NA
Macaca nemestrina	Cercopithecidae	Simiiformes	Haplorrhini	Primates	Euarchontoglires	Haplorrhini	371	Scansorial	A	NA
Macaca nigra	Cercopithecidae	Simiiformes	Haplorrhini	Primates	Euarchontoglires	Haplorrhini	335	Scansorial	A	NA
Macaca silenus	Cercopithecidae	Simiiformes	Haplorrhini	Primates	Euarchontoglires	Haplorrhini	361	Scansorial	A	NA
Macroglossus sobrinus	Pteropodidae	na	Megachiroptera	Chiroptera	Laurasiatheria	Chiroptera	387	Arboreal	A	NA
Macropus fuliginosus	Macropodidae	na	na	Diprotodontia	na	Other	958	Ground	A	NA
Macropus giganteus	Macropodidae	na	na	Diprotodontia	na	Other	1004	Ground	A	NA
Macrotus californicus	Phyllostomidae	na	Microchiroptera	Chiroptera	Laurasiatheria	Chiroptera	292	Scansorial	B	surface vs. scansorial unknown
Madoqua kirkii	Bovidae	Pecora	Ruminantia	Artiodactyla	Laurasiatheria	Other	536	Ground	A	NA
Mandrillus leucophaeus	Cercopithecidae	Simiiformes	Haplorrhini	Primates	Euarchontoglires	Haplorrhini	373	Scansorial	A	NA
Mandrillus sphinx	Cercopithecidae	Simiiformes	Haplorrhini	Primates	Euarchontoglires	Haplorrhini	299	Scansorial	A	NA
Manis crassicaudata	Manidae	na	na	Pholidota	Laurasiatheria	Other	432	Arboreal	A	NA
Manis javanica	Manidae	na	na	Pholidota	Laurasiatheria	Other	858	Arboreal	A	NA
Manis pentadactyla	Manidae	na	na	Pholidota	Laurasiatheria	Other	1102	Scansorial	A	NA
Marmota flaviventris	Sciuridae	na	Sciuromorpha	Rodentia	Euarchontoglires	Other	943	Ground	A	NA
Marmota himalayana	Sciuridae	na	Sciuromorpha	Rodentia	Euarchontoglires	Other	934	Ground	A	NA
Marmota monax	Sciuridae	na	Sciuromorpha	Rodentia	Euarchontoglires	Other	1183	Ground	A	NA
Marmota vancouverensis	Sciuridae	na	Sciuromorpha	Rodentia	Euarchontoglires	Other	867	Ground	A	NA
Martes flavigula	Mustelidae	na	Caniformia	Carnivora	Laurasiatheria	Other	1075	Arboreal	A	NA
Martes zibellina	Mustelidae	na	Caniformia	Carnivora	Laurasiatheria	Other	932	Ground	A	NA
Mastomys coucha	Muridae	na	Myomorpha	Rodentia	Euarchontoglires	Other	884	Ground	A	NA
Mastomys natalensis	Muridae	na	Myomorpha	Rodentia	Euarchontoglires	Other	541	Ground	A	NA
Megaderma lyra	Megadermatidae	na	Microchiroptera	Chiroptera	Laurasiatheria	Chiroptera	273	Ground	B	generalist, including aquatic
Megaptera novaeangliae	Balaenopteridae	Cetacea	Whippomorpha	Artiodactyla	Laurasiatheria	Cetacea	76	Marine	A	NA
Meles meles	Mustelidae	na	Caniformia	Carnivora	Laurasiatheria	Other	1221	Ground	A	NA
Mellivora capensis	Mustelidae	na	Caniformia	Carnivora	Laurasiatheria	Other	717	Ground	A	NA
Meriones unguiculatus	Muridae	na	Myomorpha	Rodentia	Euarchontoglires	Other	579	Ground	A	NA
Mesocricetus auratus	Cricetidae	na	Myomorpha	Rodentia	Euarchontoglires	Other	992	Ground	A	NA
Mesoplodon bidens	Ziphiidae	Cetacea	Whippomorpha	Artiodactyla	Laurasiatheria	Cetacea	31	Marine	A	NA
Mesoplodon densirostris	Ziphiidae	Cetacea	Whippomorpha	Artiodactyla	Laurasiatheria	Cetacea	36	Marine	A	NA
Microcebus griseorufus	Cheirogaleidae	Lemuriformes	Strepsirrhini	Primates	Euarchontoglires	Other	805	Arboreal	A	NA
Microcebus murinus	Cheirogaleidae	Lemuriformes	Strepsirrhini	Primates	Euarchontoglires	Other	786	Arboreal	A	NA
Microcebus ravelobensis	Cheirogaleidae	Lemuriformes	Strepsirrhini	Primates	Euarchontoglires	Other	767	Arboreal	A	NA
Microcebus tavaratra	Cheirogaleidae	Lemuriformes	Strepsirrhini	Primates	Euarchontoglires	Other	810	Arboreal	A	NA
Micronycteris hirsuta	Phyllostomidae	na	Microchiroptera	Chiroptera	Laurasiatheria	Chiroptera	507	Scansorial	B	surface vs. scansorial unknown
Microtus agrestis	Cricetidae	na	Myomorpha	Rodentia	Euarchontoglires	Other	1112	Ground	A	NA
Microtus arvalis	Cricetidae	na	Myomorpha	Rodentia	Euarchontoglires	Other	977	Ground	A	NA
Microtus californicus	Cricetidae	na	Myomorpha	Rodentia	Euarchontoglires	Other	1034	Ground	A	NA
Microtus fortis	Cricetidae	na	Myomorpha	Rodentia	Euarchontoglires	Other	935	Ground	A	NA
Microtus montanus	Cricetidae	na	Myomorpha	Rodentia	Euarchontoglires	Other	536	Ground	A	NA
Microtus ochrogaster	Cricetidae	na	Myomorpha	Rodentia	Euarchontoglires	Other	903	Ground	A	NA
Microtus oregoni	Cricetidae	na	Myomorpha	Rodentia	Euarchontoglires	Other	1218	Ground	A	NA
Microtus richardsoni	Cricetidae	na	Myomorpha	Rodentia	Euarchontoglires	Other	622	Ground	A	NA
Miniopterus natalensis	Vespertilionidae	na	Microchiroptera	Chiroptera	Laurasiatheria	Chiroptera	347	Aerial	A	NA
Miniopterus schreibersii	Vespertilionidae	na	Microchiroptera	Chiroptera	Laurasiatheria	Chiroptera	303	Aerial	A	NA
Miopithecus talapoin	Cercopithecidae	Simiiformes	Haplorrhini	Primates	Euarchontoglires	Haplorrhini	304	Arboreal	A	NA
Mirounga angustirostris	Phocidae	na	Caniformia	Carnivora	Laurasiatheria	Pinnipedia	256	Marine	A	NA
Mirounga leonina	Phocidae	na	Caniformia	Carnivora	Laurasiatheria	Pinnipedia	289	Marine	A	NA
Mirza coquereli	Cheirogaleidae	Lemuriformes	Strepsirrhini	Primates	Euarchontoglires	Other	726	Arboreal	A	NA
Molossus molossus	Molossidae	na	Microchiroptera	Chiroptera	Laurasiatheria	Chiroptera	400	Aerial	A	NA
Monodelphis domestica	Didelphidae	na	na	Didelphimorphia	na	Other	1173	Ground	A	NA
Monodon monoceros	Monodontidae	Cetacea	Whippomorpha	Artiodactyla	Laurasiatheria	Cetacea	19	Marine	A	NA
Mormoops blainvillei	Mormoopidae	na	Microchiroptera	Chiroptera	Laurasiatheria	Chiroptera	257	Aerial	A	NA
Moschus berezovskii	Moschidae	Pecora	Ruminantia	Artiodactyla	Laurasiatheria	Other	1092	Ground	A	NA
Moschus chrysogaster	Moschidae	Pecora	Ruminantia	Artiodactyla	Laurasiatheria	Other	456	Ground	A	NA
Moschus moschiferus	Moschidae	Pecora	Ruminantia	Artiodactyla	Laurasiatheria	Other	844	Ground	A	NA
Mungos mungo	Herpestidae	na	Feliformia	Carnivora	Laurasiatheria	Other	981	Ground	A	NA
Muntiacus crinifrons	Cervidae	Pecora	Ruminantia	Artiodactyla	Laurasiatheria	Other	1138	Ground	A	NA
Muntiacus muntjak	Cervidae	Pecora	Ruminantia	Artiodactyla	Laurasiatheria	Other	270	Ground	A	NA
Muntiacus reevesi	Cervidae	Pecora	Ruminantia	Artiodactyla	Laurasiatheria	Other	1279	Ground	A	NA
Mus caroli	Muridae	na	Myomorpha	Rodentia	Euarchontoglires	Other	1140	Ground	A	NA
Mus minutoides	Muridae	na	Myomorpha	Rodentia	Euarchontoglires	Other	1019	Ground	A	NA
Mus musculus	Muridae	na	Myomorpha	Rodentia	Euarchontoglires	Other	1124	Ground	A	NA
Mus pahari	Muridae	na	Myomorpha	Rodentia	Euarchontoglires	Other	1077	Ground	A	NA
Mus spicilegus	Muridae	na	Myomorpha	Rodentia	Euarchontoglires	Other	983	Ground	A	NA
Mus spretus	Muridae	na	Myomorpha	Rodentia	Euarchontoglires	Other	1116	Ground	A	NA
Muscardinus avellanarius	Gliridae	na	Sciuromorpha	Rodentia	Euarchontoglires	Other	722	Arboreal	A	NA
Mustela erminea	Mustelidae	na	Caniformia	Carnivora	Laurasiatheria	Other	926	Ground	A	NA
Mustela nigripes	Mustelidae	na	Caniformia	Carnivora	Laurasiatheria	Other	808	Ground	A	NA
Mustela nivalis	Mustelidae	na	Caniformia	Carnivora	Laurasiatheria	Other	786	Ground	A	NA
Myocastor coypus	Myocastoridae	na	Hystricomorpha	Rodentia	Euarchontoglires	Other	622	Ground	A	NA
Myodes glareolus	Cricetidae	na	Myomorpha	Rodentia	Euarchontoglires	Other	994	Ground	A	NA
Myotis brandtii	Vespertilionidae	na	Microchiroptera	Chiroptera	Laurasiatheria	Chiroptera	455	Aerial	B	and gleaners
Myotis davidii	Vespertilionidae	na	Microchiroptera	Chiroptera	Laurasiatheria	Chiroptera	328	Aerial	A	NA
Myotis lucifugus	Vespertilionidae	na	Microchiroptera	Chiroptera	Laurasiatheria	Chiroptera	528	Aerial	A	NA
Myotis myotis	Vespertilionidae	na	Microchiroptera	Chiroptera	Laurasiatheria	Chiroptera	457	Scansorial	A	NA
Myotis yumanensis	Vespertilionidae	na	Microchiroptera	Chiroptera	Laurasiatheria	Chiroptera	529	Aerial	A	NA
Myrmecobius fasciatus	Myrmecobiidae	na	na	Dasyuromorphia	na	Other	792	Ground	A	NA
Myrmecophaga tridactyla	Myrmecophagidae	na	Vermilingua	Pilosa	Xenarthra	Other	1160	Ground	A	NA
Nanger dama	Bovidae	Pecora	Ruminantia	Artiodactyla	Laurasiatheria	Other	432	Ground	A	NA
Nanger granti	Bovidae	Pecora	Ruminantia	Artiodactyla	Laurasiatheria	Other	741	Ground	A	NA
Nasalis larvatus	Cercopithecidae	Simiiformes	Haplorrhini	Primates	Euarchontoglires	Haplorrhini	184	Scansorial	A	NA
Neofelis nebulosa	Felidae	na	Feliformia	Carnivora	Laurasiatheria	Other	856	Scansorial	A	NA
Neotoma lepida	Cricetidae	na	Myomorpha	Rodentia	Euarchontoglires	Other	616	Ground	A	NA
Neotragus pygmaeus	Bovidae	Pecora	Ruminantia	Artiodactyla	Laurasiatheria	Other	690	Ground	A	NA
Noctilio leporinus	Noctilionidae	na	Microchiroptera	Chiroptera	Laurasiatheria	Chiroptera	369	Ground	B	aquatic
Nomascus leucogenys	Hylobatidae	Simiiformes	Haplorrhini	Primates	Euarchontoglires	Haplorrhini	265	Arboreal	A	NA
Nomascus siki	Hylobatidae	Simiiformes	Haplorrhini	Primates	Euarchontoglires	Haplorrhini	230	Arboreal	A	NA
Nyctereutes procyonoides	Canidae	na	Caniformia	Carnivora	Laurasiatheria	Other	848	Ground	A	NA
Nycticebus bengalensis	Lorisidae	Lorisiformes	Strepsirrhini	Primates	Euarchontoglires	Other	627	Arboreal	A	NA
Nycticebus coucang	Lorisidae	Lorisiformes	Strepsirrhini	Primates	Euarchontoglires	Other	775	Arboreal	A	NA
Nycticeius humeralis	Vespertilionidae	na	Microchiroptera	Chiroptera	Laurasiatheria	Chiroptera	371	Aerial	A	NA
Ochotona curzoniae	Ochotonidae	na	na	Lagomorpha	Euarchontoglires	Other	775	Ground	A	NA
Ochotona princeps	Ochotonidae	na	na	Lagomorpha	Euarchontoglires	Other	525	Ground	A	NA
Octodon degus	Octodontidae	na	Hystricomorpha	Rodentia	Euarchontoglires	Other	712	Ground	A	NA
Octomys mimax	Octodontidae	na	Hystricomorpha	Rodentia	Euarchontoglires	Other	374	Ground	A	NA
Odocoileus hemionus	Cervidae	Pecora	Ruminantia	Artiodactyla	Laurasiatheria	Other	974	Ground	A	NA
Okapia johnstoni	Giraffidae	Pecora	Ruminantia	Artiodactyla	Laurasiatheria	Other	665	Ground	A	NA
Ondatra zibethicus	Cricetidae	na	Myomorpha	Rodentia	Euarchontoglires	Other	750	Ground	A	NA
Onychomys torridus	Cricetidae	na	Myomorpha	Rodentia	Euarchontoglires	Other	951	Ground	A	NA
Orcinus orca	Delphinidae	Cetacea	Whippomorpha	Artiodactyla	Laurasiatheria	Cetacea	19	Marine	A	NA
Oreamnos americanus	Bovidae	Pecora	Ruminantia	Artiodactyla	Laurasiatheria	Other	607	Ground	A	NA
Oreotragus oreotragus	Bovidae	Pecora	Ruminantia	Artiodactyla	Laurasiatheria	Other	847	Ground	A	NA
Ornithorhynchus anatinus	Ornithorhynchidae	na	na	Monotremata	na	Other	334	Ground	A	NA
Oryctolagus cuniculus	Leporidae	na	na	Lagomorpha	Euarchontoglires	Other	851	Ground	A	NA
Oryx dammah	Bovidae	Pecora	Ruminantia	Artiodactyla	Laurasiatheria	Other	818	Ground	A	NA
Oryx gazella	Bovidae	Pecora	Ruminantia	Artiodactyla	Laurasiatheria	Other	797	Ground	A	NA
Otolemur garnettii	Galagidae	Lorisiformes	Strepsirrhini	Primates	Euarchontoglires	Other	750	Arboreal	A	NA
Ourebia ourebi	Bovidae	Pecora	Ruminantia	Artiodactyla	Laurasiatheria	Other	183	Ground	A	NA
Ovibos moschatus	Bovidae	Pecora	Ruminantia	Artiodactyla	Laurasiatheria	Other	846	Ground	A	NA
Ovis canadensis	Bovidae	Pecora	Ruminantia	Artiodactyla	Laurasiatheria	Other	759	Ground	A	NA
Pan paniscus	Hominidae	Simiiformes	Haplorrhini	Primates	Euarchontoglires	Haplorrhini	402	Scansorial	A	NA
Pan troglodytes	Hominidae	Simiiformes	Haplorrhini	Primates	Euarchontoglires	Haplorrhini	402	Scansorial	A	NA
Panthera leo	Felidae	na	Feliformia	Carnivora	Laurasiatheria	Other	862	Ground	A	NA
Panthera onca	Felidae	na	Feliformia	Carnivora	Laurasiatheria	Other	607	Ground	A	NA
Panthera pardus	Felidae	na	Feliformia	Carnivora	Laurasiatheria	Other	920	Ground	A	NA
Panthera tigris	Felidae	na	Feliformia	Carnivora	Laurasiatheria	Other	907	Ground	A	NA
Papio anubis	Cercopithecidae	Simiiformes	Haplorrhini	Primates	Euarchontoglires	Haplorrhini	380	Ground	A	NA
Papio hamadryas	Cercopithecidae	Simiiformes	Haplorrhini	Primates	Euarchontoglires	Haplorrhini	302	Ground	A	NA
Papio papio	Cercopithecidae	Simiiformes	Haplorrhini	Primates	Euarchontoglires	Haplorrhini	325	Ground	A	NA
Paradoxurus hermaphroditus	Viverridae	na	Feliformia	Carnivora	Laurasiatheria	Other	927	Arboreal	A	NA
Pedetes capensis	Pedetidae	na	Anomaluromorpha	Rodentia	Euarchontoglires	Other	666	Ground	A	NA
Peromyscus attwateri	Cricetidae	na	Myomorpha	Rodentia	Euarchontoglires	Other	885	Ground	A	NA
Peromyscus aztecus	Cricetidae	na	Myomorpha	Rodentia	Euarchontoglires	Other	874	Ground	A	NA
Peromyscus eremicus	Cricetidae	na	Myomorpha	Rodentia	Euarchontoglires	Other	992	Ground	A	NA
Peromyscus leucopus	Cricetidae	na	Myomorpha	Rodentia	Euarchontoglires	Other	1036	Ground	A	NA
Peromyscus melanophrys	Cricetidae	na	Myomorpha	Rodentia	Euarchontoglires	Other	860	Ground	A	NA
Petromus typicus	Petromuridae	na	Hystricomorpha	Rodentia	Euarchontoglires	Other	562	Ground	A	NA
Phacochoerus africanus	Suidae	na	Suina	Artiodactyla	Laurasiatheria	Other	1141	Ground	A	NA
Phalanger gymnotis	Phalangeridae	na	na	Diprotodontia	na	Other	1046	Arboreal	A	NA
Phascolarctos cinereus	Phascolarctidae	na	na	Diprotodontia	na	Other	639	Arboreal	A	NA
Philantomba maxwellii	Bovidae	Pecora	Ruminantia	Artiodactyla	Laurasiatheria	Other	445	Ground	A	NA
Phoca vitulina	Phocidae	na	Caniformia	Carnivora	Laurasiatheria	Pinnipedia	344	Marine	A	NA
Phocoena phocoena	Phocoenidae	Cetacea	Whippomorpha	Artiodactyla	Laurasiatheria	Cetacea	21	Marine	A	NA
Phocoena sinus	Phocoenidae	Cetacea	Whippomorpha	Artiodactyla	Laurasiatheria	Cetacea	22	Marine	A	NA
Phodopus roborovskii	Cricetidae	na	Myomorpha	Rodentia	Euarchontoglires	Other	781	Ground	A	NA
Phodopus sungorus	Cricetidae	na	Myomorpha	Rodentia	Euarchontoglires	Other	650	Ground	A	NA
Phyllostomus discolor	Phyllostomidae	na	Microchiroptera	Chiroptera	Laurasiatheria	Chiroptera	669	Scansorial	B	possibly also 3
Phyllostomus hastatus	Phyllostomidae	na	Microchiroptera	Chiroptera	Laurasiatheria	Chiroptera	527	Scansorial	B	possibly also 3
Pipistrellus kuhlii	Vespertilionidae	na	Microchiroptera	Chiroptera	Laurasiatheria	Chiroptera	439	Aerial	A	NA
Pipistrellus pipistrellus	Vespertilionidae	na	Microchiroptera	Chiroptera	Laurasiatheria	Chiroptera	484	Aerial	A	NA
Pithecia pithecia	Pitheciidae	Simiiformes	Haplorrhini	Primates	Euarchontoglires	Haplorrhini	314	Arboreal	A	NA
Platanista gangetica	Platanistidae	Cetacea	Whippomorpha	Artiodactyla	Laurasiatheria	Cetacea	19	Marine	A	Freshwater
Pongo abelii	Hominidae	Simiiformes	Haplorrhini	Primates	Euarchontoglires	Haplorrhini	301	Arboreal	A	NA
Pongo pygmaeus	Hominidae	Simiiformes	Haplorrhini	Primates	Euarchontoglires	Haplorrhini	337	Arboreal	A	NA
Pontoporia blainvillei	Pontoporiidae	Cetacea	Whippomorpha	Artiodactyla	Laurasiatheria	Cetacea	20	Marine	A	NA
Potos flavus	Procyonidae	na	Caniformia	Carnivora	Laurasiatheria	Other	624	Arboreal	A	NA
Praomys delectorum	Muridae	na	Myomorpha	Rodentia	Euarchontoglires	Other	917	Scansorial	A	NA
Prionailurus bengalensis	Felidae	na	Feliformia	Carnivora	Laurasiatheria	Other	865	Scansorial	A	NA
Prionailurus viverrinus	Felidae	na	Feliformia	Carnivora	Laurasiatheria	Other	879	Ground	A	NA
Procapra przewalskii	Bovidae	Pecora	Ruminantia	Artiodactyla	Laurasiatheria	Other	499	Ground	A	NA
Procavia capensis	Procaviidae	na	na	Hyracoidea	Afrotheria	Other	762	Ground	A	NA
Procyon lotor	Procyonidae	na	Caniformia	Carnivora	Laurasiatheria	Other	590	Ground	A	NA
Prolemur simus	Lemuridae	Lemuriformes	Strepsirrhini	Primates	Euarchontoglires	Other	575	Arboreal	A	NA
Propithecus coquereli	Indriidae	Lemuriformes	Strepsirrhini	Primates	Euarchontoglires	Other	612	Arboreal	A	NA
Psammomys obesus	Muridae	na	Myomorpha	Rodentia	Euarchontoglires	Other	586	Ground	A	NA
Pseudochirops corinnae	Pseudocheiridae	na	na	Diprotodontia	na	Other	797	Arboreal	A	NA
Pseudochirops cupreus	Pseudocheiridae	na	na	Diprotodontia	na	Other	824	Arboreal	A	NA
Pseudois nayaur	Bovidae	Pecora	Ruminantia	Artiodactyla	Laurasiatheria	Other	750	Ground	A	NA
Pteronura brasiliensis	Mustelidae	na	Caniformia	Carnivora	Laurasiatheria	Other	601	Ground	A	aquatic
Pteropus alecto	Pteropodidae	na	Megachiroptera	Chiroptera	Laurasiatheria	Chiroptera	407	Arboreal	A	NA
Pteropus giganteus	Pteropodidae	na	Megachiroptera	Chiroptera	Laurasiatheria	Chiroptera	679	Arboreal	A	NA
Pteropus vampyrus	Pteropodidae	na	Megachiroptera	Chiroptera	Laurasiatheria	Chiroptera	466	Arboreal	A	NA
Puma concolor	Felidae	na	Feliformia	Carnivora	Laurasiatheria	Other	614	Ground	A	NA
Puma yagouaroundi	Felidae	na	Feliformia	Carnivora	Laurasiatheria	Other	687	Ground	A	NA
Pusa sibirica	Phocidae	na	Caniformia	Carnivora	Laurasiatheria	Pinnipedia	332	Marine	A	Freshwater
Pygathrix nemaeus	Cercopithecidae	Simiiformes	Haplorrhini	Primates	Euarchontoglires	Haplorrhini	213	Arboreal	A	NA
Pygathrix nigripes	Cercopithecidae	Simiiformes	Haplorrhini	Primates	Euarchontoglires	Haplorrhini	202	Arboreal	A	NA
Raphicerus campestris	Bovidae	Pecora	Ruminantia	Artiodactyla	Laurasiatheria	Other	670	Ground	A	NA
Rattus norvegicus	Muridae	na	Myomorpha	Rodentia	Euarchontoglires	Other	1305	Ground	A	NA
Rattus rattus	Muridae	na	Myomorpha	Rodentia	Euarchontoglires	Other	1194	Ground	A	NA
Redunca redunca	Bovidae	Pecora	Ruminantia	Artiodactyla	Laurasiatheria	Other	810	Ground	A	NA
Rhinoceros unicornis	Rhinocerotidae	na	na	Perissodactyla	Laurasiatheria	Other	1117	Ground	A	NA
Rhinolophus ferrumequinum	Rhinolophidae	na	Microchiroptera	Chiroptera	Laurasiatheria	Chiroptera	393	Aerial	B	and gleaners
Rhinopithecus bieti	Cercopithecidae	Simiiformes	Haplorrhini	Primates	Euarchontoglires	Haplorrhini	206	Arboreal	A	NA
Rhinopithecus roxellana	Cercopithecidae	Simiiformes	Haplorrhini	Primates	Euarchontoglires	Haplorrhini	231	Arboreal	A	NA
Rhizomys pruinosus	Spalacidae	na	Myomorpha	Rodentia	Euarchontoglires	Other	1213	Ground	A	NA
Rhombomys opimus	Muridae	na	Myomorpha	Rodentia	Euarchontoglires	Other	604	Ground	A	NA
Rousettus aegyptiacus	Pteropodidae	na	Megachiroptera	Chiroptera	Laurasiatheria	Chiroptera	438	Arboreal	A	NA
Rousettus leschenaultii	Pteropodidae	na	Megachiroptera	Chiroptera	Laurasiatheria	Chiroptera	680	Arboreal	A	NA
Rousettus madagascariensis	Pteropodidae	na	Megachiroptera	Chiroptera	Laurasiatheria	Chiroptera	438	Arboreal	A	NA
Saguinus imperator	Cebidae	Simiiformes	Haplorrhini	Primates	Euarchontoglires	Haplorrhini	354	Arboreal	A	NA
Saguinus midas	Cebidae	Simiiformes	Haplorrhini	Primates	Euarchontoglires	Haplorrhini	281	Arboreal	A	NA
Saiga tatarica	Bovidae	Pecora	Ruminantia	Artiodactyla	Laurasiatheria	Other	418	Ground	A	NA
Sarcophilus harrisii	Dasyuridae	na	na	Dasyuromorphia	na	Other	1033	Ground	A	NA
Scalopus aquaticus	Talpidae	na	na	Eulipotyphla	Laurasiatheria	Other	1139	Ground	A	NA
Sciurus carolinensis	Sciuridae	na	Sciuromorpha	Rodentia	Euarchontoglires	Other	1401	Arboreal	A	NA
Sciurus niger	Sciuridae	na	Sciuromorpha	Rodentia	Euarchontoglires	Other	1652	Arboreal	A	NA
Sciurus vulgaris	Sciuridae	na	Sciuromorpha	Rodentia	Euarchontoglires	Other	1197	Arboreal	A	NA
Semnopithecus entellus	Cercopithecidae	Simiiformes	Haplorrhini	Primates	Euarchontoglires	Haplorrhini	186	Scansorial	A	NA
Sigmodon hispidus	Cricetidae	na	Myomorpha	Rodentia	Euarchontoglires	Other	1050	Ground	A	NA
Sorex araneus	Soricidae	na	na	Eulipotyphla	Laurasiatheria	Other	1072	Ground	A	NA
Sorex cinereus	Soricidae	na	na	Eulipotyphla	Laurasiatheria	Other	793	Ground	A	NA
Sousa chinensis	Delphinidae	Cetacea	Whippomorpha	Artiodactyla	Laurasiatheria	Cetacea	19	Marine	A	NA
Speothos venaticus	Canidae	na	Caniformia	Carnivora	Laurasiatheria	Other	610	Ground	A	NA
Spermophilus dauricus	Sciuridae	na	Sciuromorpha	Rodentia	Euarchontoglires	Other	1117	Ground	A	NA
Spilogale gracilis	Mephitidae	na	Caniformia	Carnivora	Laurasiatheria	Other	786	Ground	A	NA
Steno bredanensis	Delphinidae	Cetacea	Whippomorpha	Artiodactyla	Laurasiatheria	Cetacea	18	Marine	A	NA
Suncus etruscus	Soricidae	na	na	Eulipotyphla	Laurasiatheria	Other	900	Ground	A	NA
Suricata suricatta	Herpestidae	na	Feliformia	Carnivora	Laurasiatheria	Other	712	Ground	A	NA
Sus cebifrons	Suidae	na	Suina	Artiodactyla	Laurasiatheria	Other	957	Ground	A	NA
Sus scrofa	Suidae	na	Suina	Artiodactyla	Laurasiatheria	Other	1469	Ground	A	NA
Sylvicapra grimmia	Bovidae	Pecora	Ruminantia	Artiodactyla	Laurasiatheria	Other	788	Ground	A	NA
Symphalangus syndactylus	Hylobatidae	Simiiformes	Haplorrhini	Primates	Euarchontoglires	Haplorrhini	239	Arboreal	A	NA
Syncerus caffer	Bovidae	Pecora	Ruminantia	Artiodactyla	Laurasiatheria	Other	924	Ground	A	NA
Tachyglossus aculeatus	Tachyglossidae	na	na	Monotremata	na	Other	1816	Ground	A	NA
Tadarida brasiliensis	Molossidae	na	Microchiroptera	Chiroptera	Laurasiatheria	Chiroptera	327	Aerial	A	NA
Talpa occidentalis	Talpidae	na	na	Eulipotyphla	Laurasiatheria	Other	1388	Ground	A	NA
Tamandua tetradactyla	Myrmecophagidae	na	Vermilingua	Pilosa	Xenarthra	Other	1295	Scansorial	A	NA
Tamias sibiricus	Sciuridae	na	Sciuromorpha	Rodentia	Euarchontoglires	Other	932	Ground	A	NA
Tapirus indicus	Tapiridae	na	na	Perissodactyla	Laurasiatheria	Other	1017	Ground	A	NA
Tapirus terrestris	Tapiridae	na	na	Perissodactyla	Laurasiatheria	Other	953	Ground	A	NA
Theropithecus gelada	Cercopithecidae	Simiiformes	Haplorrhini	Primates	Euarchontoglires	Haplorrhini	371	Ground	A	NA
Thomomys bottae	Geomyidae	na	Castorimorpha	Rodentia	Euarchontoglires	Other	1109	Ground	A	NA
Thryonomys swinderianus	Thryonomyidae	na	Hystricomorpha	Rodentia	Euarchontoglires	Other	489	Ground	A	NA
Tokudaia osimensis	Muridae	na	Myomorpha	Rodentia	Euarchontoglires	Other	1208	Ground	A	NA
Tolypeutes matacus	Chlamyphoridae	na	na	Cingulata	Xenarthra	Other	1494	Ground	A	NA
Tonatia saurophila	Phyllostomidae	na	Microchiroptera	Chiroptera	Laurasiatheria	Chiroptera	454	Aerial	B	generalist
Trachops cirrhosus	Phyllostomidae	na	Microchiroptera	Chiroptera	Laurasiatheria	Chiroptera	321	Ground	A	NA
Trachypithecus francoisi	Cercopithecidae	Simiiformes	Haplorrhini	Primates	Euarchontoglires	Haplorrhini	222	Arboreal	A	NA
Tragelaphus buxtoni	Bovidae	Pecora	Ruminantia	Artiodactyla	Laurasiatheria	Other	227	Ground	A	NA
Tragelaphus eurycerus	Bovidae	Pecora	Ruminantia	Artiodactyla	Laurasiatheria	Other	1113	Ground	A	NA
Tragelaphus imberbis	Bovidae	Pecora	Ruminantia	Artiodactyla	Laurasiatheria	Other	1039	Ground	A	NA
Tragelaphus scriptus	Bovidae	Pecora	Ruminantia	Artiodactyla	Laurasiatheria	Other	1018	Ground	A	NA
Tragelaphus spekii	Bovidae	Pecora	Ruminantia	Artiodactyla	Laurasiatheria	Other	811	Ground	A	NA
Tragelaphus strepsiceros	Bovidae	Pecora	Ruminantia	Artiodactyla	Laurasiatheria	Other	1006	Ground	A	NA
Tragulus javanicus	Tragulidae	Tragulina	Ruminantia	Artiodactyla	Laurasiatheria	Other	1082	Ground	A	NA
Tragulus kanchil	Tragulidae	Tragulina	Ruminantia	Artiodactyla	Laurasiatheria	Other	1031	Ground	A	NA
Tremarctos ornatus	Ursidae	na	Caniformia	Carnivora	Laurasiatheria	Other	880	Ground	A	NA
Trichosurus vulpecula	Phalangeridae	na	na	Diprotodontia	na	Other	1289	Arboreal	A	NA
Tupaia belangeri	Tupaiidae	na	na	Scandentia	Euarchontoglires	Other	487	Ground	A	NA
Tupaia tana	Tupaiidae	na	na	Scandentia	Euarchontoglires	Other	1524	Ground	A	NA
Tursiops aduncus	Delphinidae	Cetacea	Whippomorpha	Artiodactyla	Laurasiatheria	Cetacea	13	Marine	A	NA
Tursiops truncatus	Delphinidae	Cetacea	Whippomorpha	Artiodactyla	Laurasiatheria	Cetacea	13	Marine	A	NA
Tympanoctomys barrerae	Octodontidae	na	Hystricomorpha	Rodentia	Euarchontoglires	Other	321	Ground	A	NA
Typhlomys cinereus	Platacanthomyidae	na	Myomorpha	Rodentia	Euarchontoglires	Other	975	Arboreal	A	NA
Uromys caudimaculatus	Muridae	na	Myomorpha	Rodentia	Euarchontoglires	Other	986	Scansorial	A	NA
Uropsilus gracilis	Talpidae	na	na	Eulipotyphla	Laurasiatheria	Other	960	Ground	A	NA
Ursus americanus	Ursidae	na	Caniformia	Carnivora	Laurasiatheria	Other	1289	Ground	A	NA
Ursus arctos	Ursidae	na	Caniformia	Carnivora	Laurasiatheria	Other	1310	Ground	A	NA
Ursus maritimus	Ursidae	na	Caniformia	Carnivora	Laurasiatheria	Other	1116	Ground	A	NA
Varecia variegata	Lemuridae	Lemuriformes	Strepsirrhini	Primates	Euarchontoglires	Other	551	Arboreal	A	NA
Vombatus ursinus	Vombatidae	na	na	Diprotodontia	na	Other	1154	Ground	A	NA
Vulpes vulpes	Canidae	na	Caniformia	Carnivora	Laurasiatheria	Other	747	Ground	A	NA
Xerus inauris	Sciuridae	na	Sciuromorpha	Rodentia	Euarchontoglires	Other	730	Ground	A	NA
Xerus rutilus	Sciuridae	na	Sciuromorpha	Rodentia	Euarchontoglires	Other	691	Ground	A	NA
Zalophus californianus	Otariidae	na	Caniformia	Carnivora	Laurasiatheria	Pinnipedia	398	Marine	A	NA
Zapus hudsonius	Dipodidae	na	Myomorpha	Rodentia	Euarchontoglires	Other	695	Ground	A	NA
Ziphius cavirostris	Ziphiidae	Cetacea	Whippomorpha	Artiodactyla	Laurasiatheria	Cetacea	27	Marine	A	NA

## Sheet: Supplementary-Table-5
Species name	Family	Infraorder	Suborder	Order	Superorder	Group	ForStrat	ForStratCertainty	ForStratComment	Lateral.Medial.Residuals
Ateles geoffroyi	Atelidae	Simiiformes	Haplorrhini	Primates	Euarchontoglires	Haplorrhini	Arboreal	A	NA	0.341106
Cebus albifrons	Cebidae	Simiiformes	Haplorrhini	Primates	Euarchontoglires	Haplorrhini	Arboreal	A	NA	-0.0100779
Cercopithecus mitis	Cercopithecidae	Simiiformes	Haplorrhini	Primates	Euarchontoglires	Haplorrhini	Arboreal	A	NA	-0.0053299
Crocuta crocuta	Hyaenidae	na	Feliformia	Carnivora	Laurasiatheria	Other	Ground	A	NA	-0.492275
Erythrocebus patas	Cercopithecidae	Simiiformes	Haplorrhini	Primates	Euarchontoglires	Haplorrhini	Ground	A	NA	-0.0870496
Eulemur mongoz	Lemuridae	Lemuriformes	Strepsirrhini	Primates	Euarchontoglires	Other	Arboreal	A	NA	-0.21505
Homo sapiens	Hominidae	Simiiformes	Haplorrhini	Primates	Euarchontoglires	Haplorrhini	Ground	A	NA	1.22555
Loxodonta africana	Elephantidae	na	na	Proboscidea	Afrotheria	Other	Ground	A	NA	0.594966
Macaca mulatta	Cercopithecidae	Simiiformes	Haplorrhini	Primates	Euarchontoglires	Haplorrhini	Scansorial	A	NA	-0.00456893
Mandrillus sphinx	Cercopithecidae	Simiiformes	Haplorrhini	Primates	Euarchontoglires	Haplorrhini	Scansorial	A	NA	0.470966
Miopithecus talapoin	Cercopithecidae	Simiiformes	Haplorrhini	Primates	Euarchontoglires	Haplorrhini	Arboreal	A	NA	0.1481
Mustela erminea	Mustelidae	na	Caniformia	Carnivora	Laurasiatheria	Other	Ground	A	NA	0.223435
Nasalis larvatus	Cercopithecidae	Simiiformes	Haplorrhini	Primates	Euarchontoglires	Haplorrhini	Scansorial	A	NA	-0.0885878
Nycticebus coucang	Lorisidae	Lorisiformes	Strepsirrhini	Primates	Euarchontoglires	Other	Arboreal	A	NA	-0.429215
Pan paniscus	Hominidae	Simiiformes	Haplorrhini	Primates	Euarchontoglires	Haplorrhini	Scansorial	A	NA	0.850612
Pan troglodytes	Hominidae	Simiiformes	Haplorrhini	Primates	Euarchontoglires	Haplorrhini	Scansorial	A	NA	1.1693
Panthera leo	Felidae	na	Feliformia	Carnivora	Laurasiatheria	Other	Ground	A	NA	-0.58463
Papio anubis	Cercopithecidae	Simiiformes	Haplorrhini	Primates	Euarchontoglires	Haplorrhini	Ground	A	NA	-0.046519
Phoca vitulina	Phocidae	na	Caniformia	Carnivora	Laurasiatheria	Pinnipedia	Marine	A	NA	0.782554
Phocoena phocoena	Phocoenidae	Cetacea	Whippomorpha	Artiodactyla	Laurasiatheria	Cetacea	Marine	A	NA	1.45041
Pithecia pithecia	Pitheciidae	Simiiformes	Haplorrhini	Primates	Euarchontoglires	Haplorrhini	Arboreal	A	NA	-0.00250866
Pongo pygmaeus	Hominidae	Simiiformes	Haplorrhini	Primates	Euarchontoglires	Haplorrhini	Arboreal	A	NA	1.22925
Sus scrofa	Suidae	na	Suina	Artiodactyla	Laurasiatheria	Other	Ground	A	NA	-0.811603
Tursiops truncatus	Delphinidae	Cetacea	Whippomorpha	Artiodactyla	Laurasiatheria	Cetacea	Marine	A	NA	1.0147
Ursus maritimus	Ursidae	na	Caniformia	Carnivora	Laurasiatheria	Other	Ground	A	NA	-0.194919
Vulpes vulpes	Canidae	na	Caniformia	Carnivora	Laurasiatheria	Other	Ground	A	NA	0.0193277
Zalophus californianus	Otariidae	na	Caniformia	Carnivora	Laurasiatheria	Pinnipedia	Marine	A	NA	1.04423

## Sheet: Supplementary-Table-6
Species name	Family	Infraorder	Suborder	Order	Superorder	Group	OR Functional	Cerebellum	Medial	Lateral	Lateral-Medial Residuals
Ateles geoffroyi	Atelidae	Simiiformes	Haplorrhini	Primates	Euarchontoglires	Haplorrhini	325	11.16	2.8	8.36	0.341106
Cebus albifrons	Cebidae	Simiiformes	Haplorrhini	Primates	Euarchontoglires	Haplorrhini	368	7.05	2.35	4.7	-0.0100779
Cercopithecus mitis	Cercopithecidae	Simiiformes	Haplorrhini	Primates	Euarchontoglires	Haplorrhini	279	5.84	2	3.84	-0.0053299
Crocuta crocuta	Hyaenidae	na	Feliformia	Carnivora	Laurasiatheria	Other	790	15.84	6.06	9.78	-0.492275
Erythrocebus patas	Cercopithecidae	Simiiformes	Haplorrhini	Primates	Euarchontoglires	Haplorrhini	324	7.9	2.7	5.2	-0.0870496
Eulemur mongoz	Lemuridae	Lemuriformes	Strepsirrhini	Primates	Euarchontoglires	Other	668	1.51	0.7	0.81	-0.21505
Gorilla gorilla gorilla	Hominidae	Simiiformes	Haplorrhini	Primates	Euarchontoglires	Haplorrhini	395	59.38	6.3	53.08	1.14937
Homo sapiens	Hominidae	Simiiformes	Haplorrhini	Primates	Euarchontoglires	Haplorrhini	413	139.16	11.75	127.41	1.22555
Lama guanicoe cacsilensis	Camelidae	na	Tylopoda	Artiodactyla	Laurasiatheria	Other	638	22.46	9.39	13.07	-0.763979
Loxodonta africana	Elephantidae	na	na	Proboscidea	Afrotheria	Other	1986	946.36	85.23	861.13	0.594966
Macaca mulatta	Cercopithecidae	Simiiformes	Haplorrhini	Primates	Euarchontoglires	Haplorrhini	382	8.09	2.63	5.46	-0.00456893
Mandrillus sphinx	Cercopithecidae	Simiiformes	Haplorrhini	Primates	Euarchontoglires	Haplorrhini	299	16.23	3.51	12.72	0.470966
Miopithecus talapoin	Cercopithecidae	Simiiformes	Haplorrhini	Primates	Euarchontoglires	Haplorrhini	304	3.7	1.25	2.45	0.1481
Mustela erminea	Mustelidae	na	Caniformia	Carnivora	Laurasiatheria	Other	926	0.4	0.18	0.22	0.223435
Mustela putorius furo	Mustelidae	na	Caniformia	Carnivora	Laurasiatheria	Other	960	1.12	0.54	0.58	-0.216214
Nasalis larvatus	Cercopithecidae	Simiiformes	Haplorrhini	Primates	Euarchontoglires	Haplorrhini	184	7.65	2.63	5.02	-0.0885878
Neogale vison	Mustelidae	na	Caniformia	Carnivora	Laurasiatheria	Other	921	1.17	0.51	0.66	-0.0136926
Nycticebus coucang	Lorisidae	Lorisiformes	Strepsirrhini	Primates	Euarchontoglires	Other	775	1.42	0.73	0.69	-0.429215
Odocoileus virginianus texanus	Cervidae	Pecora	Ruminantia	Artiodactyla	Laurasiatheria	Other	921	18.75	10.96	7.79	-1.47975
Pan paniscus	Hominidae	Simiiformes	Haplorrhini	Primates	Euarchontoglires	Haplorrhini	402	47.3	6.48	40.82	0.850612
Pan troglodytes	Hominidae	Simiiformes	Haplorrhini	Primates	Euarchontoglires	Haplorrhini	402	46.28	5.09	41.19	1.1693
Panthera leo	Felidae	na	Feliformia	Carnivora	Laurasiatheria	Other	862	26.54	9.87	16.67	-0.58463
Papio anubis	Cercopithecidae	Simiiformes	Haplorrhini	Primates	Euarchontoglires	Haplorrhini	380	17.71	5.19	12.52	-0.046519
Phoca vitulina	Phocidae	na	Caniformia	Carnivora	Laurasiatheria	Pinnipedia	344	24.01	3.93	20.08	0.782554
Phocoena phocoena	Phocoenidae	Cetacea	Whippomorpha	Artiodactyla	Laurasiatheria	Cetacea	21	70.46	5.81	64.65	1.45041
Pithecia pithecia	Pitheciidae	Simiiformes	Haplorrhini	Primates	Euarchontoglires	Haplorrhini	314	3.58	1.32	2.26	-0.00250866
Pongo pygmaeus	Hominidae	Simiiformes	Haplorrhini	Primates	Euarchontoglires	Haplorrhini	337	45.01	4.77	40.24	1.22925
Sapajus apella	Cebidae	Simiiformes	Haplorrhini	Primates	Euarchontoglires	Haplorrhini	406	6.45	1.83	4.62	0.293525
Sus scrofa	Suidae	na	Suina	Artiodactyla	Laurasiatheria	Other	1469	9.28	4.47	4.81	-0.811603
Tursiops truncatus	Delphinidae	Cetacea	Whippomorpha	Artiodactyla	Laurasiatheria	Cetacea	13	258.75	22.42	236.33	1.0147
Ursus maritimus	Ursidae	na	Caniformia	Carnivora	Laurasiatheria	Other	1116	51.95	13.87	38.08	-0.194919
Vulpes vulpes	Canidae	na	Caniformia	Carnivora	Laurasiatheria	Other	747	4.59	1.61	2.98	0.0193277
Zalophus californianus	Otariidae	na	Caniformia	Carnivora	Laurasiatheria	Pinnipedia	398	58.19	6.68	51.51	1.04423

## Sheet: Supplementary-Table-7
Species Name	Family	Infraorder	Suborder	Order	Superorder	Group	OR Functional	Endocranial Volume (cm3)	OB Volume (cm3)	Relative OB Volume (%)
Ateles geoffroyi	Atelidae	Simiiformes	Haplorrhini	Primates	Euarchontoglires	Haplorrhini	325	104.25	0.09	0.09
Callithrix jacchus	Cebidae	Simiiformes	Platyrrhini	Primates	Euarchontoglires	Other	379	7.34	0.02	0.32
Carollia perspicillata	Phyllostomidae	na	Microchiroptera	Chiroptera	Laurasiatheria	Chiroptera	359	0.55	0.02	4.31
Cercopithecus mitis	Cercopithecidae	Simiiformes	Haplorrhini	Primates	Euarchontoglires	Haplorrhini	279	72.39	0.12	0.16
Cheirogaleus medius	Cheirogaleidae	Lemuriformes	Strepsirrhini	Primates	Euarchontoglires	Other	604	3.03	0.1	3.45
Chrysochloris asiatica	Chrysochloridae	na	na	Afrosoricida	Afrotheria	Other	1053	0.68	0.06	8.68
Craseonycteris thonglongyai	Craseonycteridae	na	Microchiroptera	Chiroptera	Laurasiatheria	Chiroptera	151	0.09	0	0.76
Dasypus novemcinctus	Dasypodidae	na	na	Cingulata	Xenarthra	Other	1535	10.55	1.29	12.25
Daubentonia madagascariensis	Daubentoniidae	Chiromyiformes	Strepsirrhini	Primates	Euarchontoglires	Other	656	43.58	0.69	1.59
Desmodus rotundus	Phyllostomidae	na	Microchiroptera	Chiroptera	Laurasiatheria	Chiroptera	697	1	0.03	3.3
Echinops telfairi	Tenrecidae	na	na	Afrosoricida	Afrotheria	Other	895	0.6	0.07	11.94
Eidolon helvum	Pteropodidae	na	Megachiroptera	Chiroptera	Laurasiatheria	Chiroptera	317	4.29	0.21	4.86
Eonycteris spelaea	Pteropodidae	na	Megachiroptera	Chiroptera	Laurasiatheria	Chiroptera	256	1.31	0.07	5.11
Erinaceus europaeus	Erinaceidae	na	na	Eulipotyphla	Laurasiatheria	Other	971	3.23	0.33	10.33
Erythrocebus patas	Cercopithecidae	Simiiformes	Haplorrhini	Primates	Euarchontoglires	Haplorrhini	324	104.25	0.05	0.05
Eulemur fulvus	Lemuridae	Lemuriformes	Strepsirrhini	Primates	Euarchontoglires	Other	652	22.49	0.21	0.93
Galemys pyrenaicus	Talpidae	na	na	Eulipotyphla	Laurasiatheria	Other	607	1.28	0.04	3.05
Indri indri	Indriidae	Lemuriformes	Strepsirrhini	Primates	Euarchontoglires	Other	496	36.97	0.17	0.46
Loris tardigradus	Lorisidae	Lorisiformes	Strepsirrhini	Primates	Euarchontoglires	Other	647	6.37	0.09	1.38
Macaca mulatta	Cercopithecidae	Simiiformes	Haplorrhini	Primates	Euarchontoglires	Haplorrhini	382	89.77	0.08	0.09
Microcebus murinus	Cheirogaleidae	Lemuriformes	Strepsirrhini	Primates	Euarchontoglires	Other	786	1.72	0.04	2.6
Monodelphis domestica	Didelphidae	na	na	Didelphimorphia	na	Other	1173	0.97	0.08	8.18
Myotis myotis	Vespertilionidae	na	Microchiroptera	Chiroptera	Laurasiatheria	Chiroptera	457	0.19	0.01	2.75
Nasalis larvatus	Cercopithecidae	Simiiformes	Haplorrhini	Primates	Euarchontoglires	Haplorrhini	184	93.63	0.03	0.03
Nycticebus coucang	Lorisidae	Lorisiformes	Strepsirrhini	Primates	Euarchontoglires	Other	775	12.07	0.16	1.35
Ornithorhynchus anatinus	Ornithorhynchidae	na	na	Monotremata	na	Other	334	9.73	0.09	0.95
Pan troglodytes	Hominidae	Simiiformes	Haplorrhini	Primates	Euarchontoglires	Haplorrhini	402	390.93	0.26	0.07
Papio anubis	Cercopithecidae	Simiiformes	Haplorrhini	Primates	Euarchontoglires	Haplorrhini	380	194.02	0.29	0.15
Phascolarctos cinereus	Phascolarctidae	na	na	Diprotodontia	na	Other	639	26.28	0.67	2.56
Procavia capensis	Procaviidae	na	na	Hyracoidea	Afrotheria	Other	762	14.34	0.46	3.21
Pteropus vampyrus	Pteropodidae	na	Megachiroptera	Chiroptera	Laurasiatheria	Chiroptera	466	9.12	0.24	2.67
Pygathrix nemaeus	Cercopithecidae	Simiiformes	Haplorrhini	Primates	Euarchontoglires	Haplorrhini	213	74.32	0.01	0.01
Rattus norvegicus	Muridae	na	Myomorpha	Rodentia	Euarchontoglires	Other	1305	2.24	0.06	2.68
Rousettus aegyptiacus	Pteropodidae	na	Megachiroptera	Chiroptera	Laurasiatheria	Chiroptera	438	2.07	0.11	5.11
Sorex araneus	Soricidae	na	na	Eulipotyphla	Laurasiatheria	Other	1072	0.19	0.02	8.17
Suncus etruscus	Soricidae	na	na	Eulipotyphla	Laurasiatheria	Other	900	0.37	0.03	9.38
Tachyglossus aculeatus	Tachyglossidae	na	na	Monotremata	na	Other	1816	20.01	0.46	2.28
Trachops cirrhosus	Phyllostomidae	na	Microchiroptera	Chiroptera	Laurasiatheria	Chiroptera	321	1	0.02	2.34
Varecia variegata	Lemuridae	Lemuriformes	Strepsirrhini	Primates	Euarchontoglires	Other	551	30.41	0.37	1.23
Vombatus ursinus	Vombatidae	na	na	Diprotodontia	na	Other	1154	63.55	2	3.14

## Sheet: Supplementary-Table-8
Species	Common name	Taxid	Family	Suborder	Order	Superorder	Subclass	Deviation Value
Aepyceros melampus	Impala	9897	Bovidae	Ruminantia	Artiodactyla	Laurasiatheria	Eutheria	-77.32
Alcelaphus buselaphus	Hartebeest	59517	Bovidae	Ruminantia	Artiodactyla	Laurasiatheria	Eutheria	-153.32
Capra ibex	Alpine ibex	72542	Bovidae	Ruminantia	Artiodactyla	Laurasiatheria	Eutheria	-87.32
Madoqua kirkii	Kirk's dik-dik	66434	Bovidae	Ruminantia	Artiodactyla	Laurasiatheria	Eutheria	-26.32
Nanger dama	Dama gazelle	67940	Bovidae	Ruminantia	Artiodactyla	Laurasiatheria	Eutheria	-9.32
Ourebia ourebi	Oribi	59536	Bovidae	Ruminantia	Artiodactyla	Laurasiatheria	Eutheria	-99.32
Philantomba maxwellii	Maxwell's duiker	907741	Bovidae	Ruminantia	Artiodactyla	Laurasiatheria	Eutheria	-5.32
Raphicerus campestris	Steenbok	59544	Bovidae	Ruminantia	Artiodactyla	Laurasiatheria	Eutheria	-2.32
Saiga tatarica	Saiga antelope	34875	Bovidae	Ruminantia	Artiodactyla	Laurasiatheria	Eutheria	-26.32
Tragelaphus buxtoni	Mountain nyala	69296	Bovidae	Ruminantia	Artiodactyla	Laurasiatheria	Eutheria	-78.32
Tragelaphus oryx	Eland	9945	Bovidae	Ruminantia	Artiodactyla	Laurasiatheria	Eutheria	-95.32
Bradypus variegatus	Brown-throated sloth	9355	Bradypodidae	Folivora	Pilosa	Xenarthra	Eutheria	-158.32
Vicugna pacos	Alpaca	30538	Camelidae	Tylopoda	Artiodactyla	Laurasiatheria	Eutheria	-0.32
Cavia aperea	Brazilian guinea pig	37548	Caviidae	Hystricomorpha	Rodentia	Euarchontoglires	Eutheria	-55.32
Dolichotis patagonum	Patagonian cavy	29091	Caviidae	Hystricomorpha	Rodentia	Euarchontoglires	Eutheria	-2.32
Capreolus capreolus	Western roe deer	9858	Cervidae	Ruminantia	Artiodactyla	Laurasiatheria	Eutheria	-29.32
Muntiacus muntjak	Muntjak	9888	Cervidae	Ruminantia	Artiodactyla	Laurasiatheria	Eutheria	-113.32
Ellobius talpinus	Northern mole vole	329620	Cricetidae	Myomorpha	Rodentia	Euarchontoglires	Eutheria	-31.32
Microtus montanus	Montane vole	88450	Cricetidae	Myomorpha	Rodentia	Euarchontoglires	Eutheria	-2.32
Ctenodactylus gundi	Northern gundi	10166	Ctenodactylidae	Hystricomorpha	Rodentia	Euarchontoglires	Eutheria	-34.32
Antechinus flavipes	Yellow-footed antechinus	38775	Dasyuridae	na	Dasyuromorphia	na	Metatheria	-1.32
Jaculus jaculus	Lesser Egyptian jerboa	51337	Dipodidae	Myomorpha	Rodentia	Euarchontoglires	Eutheria	-3.32
Orientallactaga bullata	Gobi jerboa	1041416	Dipodidae	Myomorpha	Rodentia	Euarchontoglires	Eutheria	-6.32
Zapus hudsonius	Meadow jumping mouse	160400	Dipodidae	Myomorpha	Rodentia	Euarchontoglires	Eutheria	-5.32
Indri indri	Indri	34827	Indriidae	Strepsirrhini	Primates	Euarchontoglires	Eutheria	-0.32
Lepus americanus	Snowshoe hare	48086	Leporidae	na	Lagomorpha	Euarchontoglires	Eutheria	-5.32
Lepus timidus	Mountain hare	62621	Leporidae	na	Lagomorpha	Euarchontoglires	Eutheria	-2.32
Manis crassicaudata	Indian pangolin	1496684	Manidae	na	Pholidota	Laurasiatheria	Eutheria	-13.32
Phataginus tricuspis	Tree pangolin	358128	Manidae	na	Pholidota	Laurasiatheria	Eutheria	-11.32
Moschus chrysogaster	Alpine musk deer	68412	Moschidae	Ruminantia	Artiodactyla	Laurasiatheria	Eutheria	-11.32
Mastomys natalensis	African soft-furred rat	10112	Muridae	Myomorpha	Rodentia	Euarchontoglires	Eutheria	-12.32
Myrmecobius fasciatus	Numbat	55782	Myrmecobiidae	na	Dasyuromorphia	na	Metatheria	-2.32
Octomys mimax	Viscacha rat	135583	Octodontidae	Hystricomorpha	Rodentia	Euarchontoglires	Eutheria	-23.32
Tympanoctomys barrerae	Plains viscacha rat	61882	Octodontidae	Hystricomorpha	Rodentia	Euarchontoglires	Eutheria	-48.32
Ornithorhynchus anatinus	Platypus	9258	Ornithorhynchidae	na	Monotremata	na	Prototheria	-71.32
Pseudochirops corinnae	Golden ringtail possum	65629	Pseudocheiridae	na	Diprotodontia	na	Metatheria	-8.32
Pseudochirops cupreus	Coppery ringtail possum	37702	Pseudocheiridae	na	Diprotodontia	na	Metatheria	-2.32
Crocidura indochinensis	Indochinese shrew	876679	Soricidae	na	Eulipotyphla	Laurasiatheria	Eutheria	-10.32
Cryptotis parvus	Least shrew	183661	Soricidae	na	Eulipotyphla	Laurasiatheria	Eutheria	-99.32
Condylura cristata	Star-nosed mole	143302	Talpidae	na	Eulipotyphla	Laurasiatheria	Eutheria	-7.32
Thryonomys swinderianus	Greater cane rat	10169	Thryonomyidae	Hystricomorpha	Rodentia	Euarchontoglires	Eutheria	-16.32
Thylacinus cynocephalus	Tasmanian wolf	9275	Thylacinidae	na	Dasyuromorphia	na	Metatheria	-5.32
Tupaia belangeri	Northern tree shrew	37347	Tupaiidae	na	Scandentia	Euarchontoglires	Eutheria	-39.32
							Average (outliers)	-34.7386
							Average (target Groups)	-75.5321
